# Supplementary material for: Effect of carbohydrate substrates on growth and enterotoxin gene expression in Bacillus cereus (pacificus)
Source: Sci Rep. 2025 Dec 10;16:1917. doi: 10.1038/s41598-025-31689-5 (PMC12804731; doi:10.1038/s41598-025-31689-5)
Supplement: Supplementary file 1 — Supplementary Material 1 [file 41598_2025_31689_MOESM1_ESM.xlsx]

## Sheet: Supplementary Table S1
Supplementary Table S1. Reference genome dataset used for strain identification.
Accession	Name
GCA_000003645	CM000714.1 Bacillus cereus m1293 chromosome, whole genome shotgun sequence
GCA_000003955	CM000741.1 Bacillus cereus AH1273 chromosome, whole genome shotgun sequence
GCA_000007825	AE016877.1 Bacillus cereus ATCC 14579, complete genome
GCA_000008005	AE017194.1 Bacillus cereus ATCC 10987, complete genome
GCA_000011625	CP000001.1 Bacillus cereus E33L, complete genome
GCA_000013065	CP000227.1 Bacillus cereus Q1, complete genome
GCA_000021205	CP001176.1 Bacillus cereus B4264, complete genome
GCA_000021225	CP001177.1 Bacillus cereus AH187, complete genome
GCA_000021305	CP001186.1 Bacillus cereus G9842, complete genome
GCA_000021785	CP001283.1 Bacillus cereus AH820, complete genome
GCA_000022505	CP001407.1 Bacillus cereus 03BB102, complete genome
GCA_000143605	CP001746.1 Bacillus cereus biovar anthracis str. CI, complete genome
GCA_000160895	CM000715.1 Bacillus cereus ATCC 10876 chromosome, whole genome shotgun sequence
GCA_000160915	CM000716.1 Bacillus cereus BGSC 6E1 chromosome, whole genome shotgun sequence
GCA_000160935	CM000717.1 Bacillus cereus 172560W chromosome, whole genome shotgun sequence
GCA_000160995	CM000720.1 Bacillus cereus R309803 chromosome, whole genome shotgun sequence
GCA_000161015	CM000721.1 Bacillus cereus ATCC 4342 chromosome, whole genome shotgun sequence
GCA_000161035	CM000722.1 Bacillus cereus m1550 chromosome, whole genome shotgun sequence
GCA_000161055	CM000723.1 Bacillus cereus BDRD-ST24 chromosome, whole genome shotgun sequence
GCA_000161075	CM000724.1 Bacillus cereus BDRD-ST26 chromosome, whole genome shotgun sequence
GCA_000161095	CM000725.1 Bacillus cereus BDRD-ST196 chromosome, whole genome shotgun sequence
GCA_000161115	CM000726.1 Bacillus cereus BDRD-Cer4 chromosome, whole genome shotgun sequence
GCA_000161135	CM000727.1 Bacillus cereus 95/8201 chromosome, whole genome shotgun sequence
GCA_000161155	CM000728.1 Bacillus cereus Rock1-3 chromosome, whole genome shotgun sequence
GCA_000161175	CM000729.1 Bacillus cereus Rock1-15 chromosome, whole genome shotgun sequence
GCA_000161195	CM000730.1 Bacillus cereus Rock3-28 chromosome, whole genome shotgun sequence
GCA_000161215	CM000731.1 Bacillus cereus Rock3-29 chromosome, whole genome shotgun sequence
GCA_000161235	CM000732.1 Bacillus cereus Rock3-42 chromosome, whole genome shotgun sequence
GCA_000161255	CM000733.1 Bacillus cereus Rock3-44 chromosome, whole genome shotgun sequence
GCA_000161275	CM000734.1 Bacillus cereus Rock4-2 chromosome, whole genome shotgun sequence
GCA_000161295	CM000735.1 Bacillus cereus Rock4-18 chromosome, whole genome shotgun sequence
GCA_000161315	CM000736.1 Bacillus cereus F65185 chromosome, whole genome shotgun sequence
GCA_000161355	CM000738.1 Bacillus cereus AH676 chromosome, whole genome shotgun sequence
GCA_000161375	CM000739.1 Bacillus cereus AH1271 chromosome, whole genome shotgun sequence
GCA_000161395	CM000740.1 Bacillus cereus AH1272 chromosome, whole genome shotgun sequence
GCA_000239195	CP003187.1 Bacillus cereus F837/76, complete genome
GCA_000283675	AP007209.1 Bacillus cereus NC7401 genomic DNA, complete genome
GCA_000292415	CP003747.1 Bacillus cereus FRI-35, complete genome
GCA_000338315	CM001787.1 Bacillus cereus F chromosome, whole genome shotgun sequence
GCA_000635895	CP015727.1 Bacillus cereus strain A1, complete genome
GCA_000724585	CP008712.1 Bacillus cereus strain FT9, complete genome
GCA_000789315	CP009941.1 Bacillus cereus strain 03BB87, complete genome
GCA_000832385	CP009300.1 Bacillus cereus D17, complete genome
GCA_000832405	CP009318.1 Bacillus cereus 03BB102, complete genome
GCA_000832525	CP009369.1 Bacillus cereus strain FM1, complete genome
GCA_000832765	CP009596.1 Bacillus cereus strain 3a, complete genome
GCA_000832805	CP009590.1 Bacillus cereus G9241, complete genome
GCA_000832845	CP009628.1 Bacillus cereus ATCC 4342, complete genome
GCA_000832865	CP009641.1 Bacillus cereus 03BB108, complete genome
GCA_000833045	CP009968.1 Bacillus cereus E33L, complete genome
GCA_000835185	CP009605.1 Bacillus cereus strain S2-8, complete genome
GCA_000978375	CP009686.1 Bacillus cereus strain FORC_005, complete genome
GCA_001277915	CP012483.1 Bacillus cereus strain NJ-W, complete genome
GCA_001518875	CP011145.1 Bacillus cereus strain FORC_013, complete sequence
GCA_001635915	CP011151.1 Bacillus cereus strain CMCC P0021, complete genome
GCA_001635955	CP011153.1 Bacillus cereus strain CMCC P0011, complete genome
GCA_001635995	CP011155.1 Bacillus cereus strain HN001, complete genome
GCA_001721145	CP012691.1 Bacillus cereus strain FORC_024, complete genome
GCA_001880305	CP015589.1 Bacillus cereus strain AR156 chromosome, complete genome
GCA_001941885	CP018933.1 Bacillus cereus strain ISSFR-9F chromosome, complete genome
GCA_001941905	CP018931.1 Bacillus cereus strain ISSFR-3F chromosome, complete genome
GCA_001941925	CP018935.1 Bacillus cereus strain JEM-2 chromosome, complete genome
GCA_002000005	CP014486.1 Bacillus cereus strain FORC021, complete genome
GCA_002117465	CP020937.1 Bacillus cereus strain BC-AK genomic sequence
GCA_002117835	CP020803.1 Bacillus cereus strain 25 genome
GCA_002117855	CP020804.1 Bacillus cereus strain 29 genome
GCA_002214705	CP016315.1 Bacillus cereus strain D12_2, complete sequence
GCA_002214725	CP016316.1 Bacillus cereus strain M3, complete sequence
GCA_002214765	CP017234.1 Bacillus cereus strain FORC_048, complete genome
GCA_002215175	CP016595.1 Bacillus cereus strain K8, complete sequence
GCA_002216125	CP016360.1 Bacillus cereus strain M13 chromosome, complete genome
GCA_002220285	CP017060.1 Bacillus cereus strain FORC_047 chromosome, complete genome
GCA_002224345	CP022445.1 Bacillus cereus C1L chromosome, complete genome
GCA_002290105	CP023179.1 Bacillus cereus strain CC-1 chromosome, complete genome
GCA_002504205	CP023727.1 Bacillus cereus strain BHU1 chromosome
GCA_002504225	CP023726.1 Bacillus cereus strain BHU2 chromosome
GCA_002813875	CP024655.1 Bacillus cereus strain MLY1 chromosome MLY1.0, complete sequence
GCA_002952795	CP026375.1 Bacillus cereus ATCC 10987 chromosome
GCA_002952815	CP026376.1 Bacillus cereus strain G9241 chromosome
GCA_002953495	CP026523.1 Bacillus cereus strain MBGJa3 chromosome
GCA_003013315	CP026678.1 Bacillus cereus strain TG1-6 chromosome, complete genome
GCA_003020845	CP020383.1 Bacillus cereus strain FORC60 chromosome, complete genome
GCA_003568565	CP023245.1 Bacillus cereus strain HBL-AI chromosome, complete genome
GCA_004006495	CP030982.1 Bacillus cereus strain ZB201708 chromosome, complete genome
GCA_004771155	CP028516.1 Bacillus cereus strain 1000305 chromosome, complete genome
GCA_004801195	CP039269.1 Bacillus cereus strain MH19 chromosome, complete genome
GCA_005707595	CP029468.1 Bacillus cereus strain FORC_086 chromosome, complete genome
GCA_006094295	CP034551.1 Bacillus cereus ATCC 14579 chromosome, complete genome
GCA_006349715	CP085498.1 Bacillus cereus strain A22 chromosome, complete genome
GCA_006349735	CP085501.1 Bacillus cereus strain A24 chromosome, complete genome
GCA_006384875	CP029454.1 Bacillus cereus strain FORC087 chromosome, complete genome
GCA_007923085	CP031778.1 Bacillus cereus strain Co1-1 chromosome
GCA_008041975	CP042929.1 Bacillus cereus strain G1-1 chromosome, complete genome
GCA_009497015	CP045606.2 Bacillus cereus strain SB1 chromosome, complete genome
GCA_009738575	CP046511.1 Bacillus cereus strain JHU chromosome, complete genome
GCA_009739925	CP040334.1 Bacillus cereus strain DLOU-Changhai chromosome, complete genome
GCA_009739965	CP040340.1 Bacillus cereus strain DLOU-Tangshan chromosome, complete genome
GCA_009739985	CP040342.1 Bacillus cereus strain DLOU-Weihai chromosome, complete genome
GCA_010223795	CP027920.1 Bacillus cereus strain SGAir0263 chromosome, complete genome
GCA_010232525	CP028009.1 Bacillus cereus strain SGAir0260 chromosome
GCA_013112375	CP053289.1 Bacillus cereus strain WPySW2 chromosome, complete genome
GCA_013177495	CP053656.2 Bacillus cereus strain CTMA_1571 chromosome, complete genome
GCA_013267235	CP053965.1 Bacillus cereus strain FDAARGOS_802 chromosome, complete genome
GCA_013267255	CP053951.1 Bacillus cereus strain FDAARGOS_799 chromosome, complete genome
GCA_013267275	CP053954.1 Bacillus cereus strain FDAARGOS_798 chromosome, complete genome
GCA_013267455	CP053991.1 Bacillus cereus strain FDAARGOS_781 chromosome, complete genome
GCA_013267475	CP053997.1 Bacillus cereus strain FDAARGOS_780 chromosome, complete genome
GCA_013267775	CP053931.1 Bacillus cereus strain FDAARGOS_797 chromosome, complete genome
GCA_013284455	CP085506.1 Bacillus cereus strain HD2.4 chromosome, complete genome
GCA_013284505	CP085510.1 Bacillus cereus strain HD1.4B chromosome, complete genome
GCA_013394245	CP043966.1 Bacillus cereus strain H2 chromosome, complete genome
GCA_015209805	CP063651.1 Bacillus cereus strain 39 chromosome
GCA_015335145	CP064072.1 Bacillus cereus strain EFR-1 chromosome
GCA_016027015	CP065650.1 Bacillus cereus strain FDAARGOS_918 chromosome, complete genome
GCA_016117775	CP065881.1 Bacillus cereus strain FDAARGOS_919 chromosome
GCA_016727405	CP068135.1 Bacillus cereus strain FDAARGOS_1084 chromosome, complete genome
GCA_016774535	CP068717.1 Bacillus cereus strain CH chromosome, complete genome
GCA_016774555	CP068719.1 Bacillus cereus strain 21155 chromosome, complete genome
GCA_016774575	CP068724.1 Bacillus cereus strain AFA01 chromosome, complete genome
GCA_016917795	CP070339.1 Bacillus cereus strain VKM B-370 chromosome, complete genome
GCA_018309125	CP072766.1 Bacillus cereus strain BC06 chromosome, complete genome
GCA_018309145	CP072769.1 Bacillus cereus strain BC07 chromosome, complete genome
GCA_018309165	CP072774.1 Bacillus cereus strain BC33 chromosome, complete genome
GCA_018884185	CP063158.1 Bacillus cereus strain CF4-51 chromosome, complete genome
GCA_019704155	AP024504.2 Bacillus cereus HT18 DNA, complete genome
GCA_021391515	CP090081.1 Bacillus cereus strain CPT56D-587-MTF chromosome, complete genome
GCA_021442085	CP090421.1 Bacillus cereus strain NR1 chromosome, complete genome
GCA_021496685	CP090940.1 Bacillus cereus strain FS2 chromosome
GCA_021654875	AP022857.1 Bacillus cereus MRY14-0045 DNA, complete genome
GCA_021654895	AP022874.1 Bacillus cereus MRY14-0057 DNA, complete genome
GCA_021654915	AP022877.1 Bacillus cereus MRY14-0060 DNA, complete genome
GCA_021654935	AP022886.1 Bacillus cereus MRY14-0074 DNA, complete genome
GCA_021654955	AP022894.1 Bacillus cereus MRY14-0075 DNA, complete genome
GCA_021654975	AP022903.1 Bacillus cereus MRY14-0079 DNA, complete genome
GCA_021654995	AP022907.1 Bacillus cereus MRY14-0100 DNA, complete genome
GCA_021655015	AP022915.1 Bacillus cereus MRY14-0105 DNA, complete genome
GCA_021655035	AP022921.1 Bacillus cereus J1 DNA, complete genome
GCA_021655055	AP022927.1 Bacillus cereus J2 DNA, complete genome
GCA_021655135	AP022934.1 Bacillus cereus J7 DNA, complete genome
GCA_021655155	AP022946.1 Bacillus cereus J10 DNA, complete genome
GCA_021655175	AP022952.1 Bacillus cereus J39 DNA, complete genome
GCA_021655195	AP022956.1 Bacillus cereus J51 DNA, complete genome
GCA_021655215	AP022964.1 Bacillus cereus J62 DNA, complete genome
GCA_021655235	AP022970.1 Bacillus cereus J75 DNA, complete genome
GCA_021655255	AP022975.1 Bacillus cereus 30040 DNA, complete genome
GCA_021655275	AP022978.1 Bacillus cereus 30043 DNA, complete genome
GCA_021655295	AP022981.1 Bacillus cereus 30048 DNA, complete genome
GCA_021655315	AP022986.1 Bacillus cereus 30052 DNA, complete genome
GCA_021655335	AP022994.1 Bacillus cereus 30075 DNA, complete genome
GCA_021655355	AP023000.1 Bacillus cereus 30077 DNA, complete genome
GCA_021655375	AP023005.1 Bacillus cereus 30090 DNA, complete genome
GCA_021655395	AP023014.1 Bacillus cereus 30102 DNA, complete genome
GCA_022406835	CP068984.1 Bacillus cereus strain IIPK35 chromosome
GCA_022699365	CP093928.1 Bacillus cereus strain AH7-7 chromosome, complete genome
GCA_022700995	CP063975.1 Bacillus cereus strain N435-1 chromosome, complete genome
GCA_023008425	CP095377.1 Bacillus cereus strain SEM-15 chromosome, complete genome
GCA_023094015	CP095767.1 Bacillus cereus strain CDHWZ7 chromosome, complete genome
GCA_023516415	CP097351.1 Bacillus cereus strain DQ01 chromosome, complete genome
GCA_023824275	CP098734.1 Bacillus cereus strain MV19 chromosome
GCA_024299105	CP091971.1 Bacillus cereus strain MB1 chromosome, complete genome
GCA_024498915	CP091476.1 Bacillus cereus strain GSICC 30237 chromosome, complete genome
GCA_024584625	CP089601.1 Bacillus cereus strain C-1 chromosome, complete genome
GCA_025035865	CP010272.1 Bacillus cereus strain FORC_010, complete genome
GCA_025502485	CP106675.1 Bacillus cereus strain SRCM116293 chromosome, complete genome

## Sheet: Supplementary Table S2
Supplementary Table S2. Growth kinetics derived from Gompertz model for different carbohydrate substrates.
37 °C	control	fructose	galactose	glucose	lactose	sucrose	xylitol
λ (h)	2.14	1.35	1.45	1.87	1.41	1.67	2.45
µmax (h-1)	0.07	0.13	0.09	0.13	0.11	0.14	0.08
Td (h)	9.98	5.49	7.49	5.27	6.08	5.10	8.16
Ymax (OD600)	0.40	0.47	0.37	0.67	0.44	0.62	0.57
30 °C	control	fructose	galactose	glucose	lactose	sucrose	xylitol
λ (h)	3.12	2.61	2.65	2.57	2.53	2.92	2.44
µmax (h-1)	0.05	0.10	0.05	0.11	0.06	0.08	0.07
Td (h)	12.94	6.92	12.98	6.42	10.69	8.19	9.71
Ymax (OD600)	0.45	0.71	0.38	0.75	0.45	0.67	0.47
25 °C	control	fructose	galactose	glucose	lactose	sucrose	xylitol
λ (h)	20.36	277.90	958.10	269.60	36.16	28.28	30.34
µmax (h-1)	0.03	–	–	–	0.08	0.06	0.05
Td (h)	21.53	0.00	0.00	0.00	9.02	10.94	14.61
Ymax (OD600)	1.78	–	–	–	7.55	4.87	3.91
20 °C	control	fructose	galactose	glucose	lactose	sucrose	xylitol
λ (h)	20.35	556.00	414.00	257.90	20.09	35.44	15.85
µmax (h-1)	0.03	–	–	–	0.03	0.06	0.02
Td (h)	25.78	0.00	0.00	0.00	27.55	11.63	29.13
Ymax (OD600)	1.49	–	–	–	1.37	5.74	1.03
15 °C	control	fructose	galactose	glucose	lactose	sucrose	xylitol
λ (h)	1705.00	7068.00	–	7650.00	499.80	3078.00	1670.00
µmax (h-1)	–	–	–	–	0.02	–	–
Td (h)	–	0.00	–	0.00	30.14	–	–
Ymax (OD600)	–	–	0.20	–	31.24	–	–
Note: λ, lag phase duration; μₘₐₓ, maximum specific growth rate; Td, doubling time; Yₘₐₓ, maximum bacterial population determined by OD₆₀₀; “–”, parameter could not be calculated due to poor fit to the Gompertz model.

## Sheet: Supplementary Table S3
Supplementary Table S3. Statistical evaluation of the Gompertz model fit to experimental growth data.
37 °C	control	fructose	galactose	glucose	lactose	sucrose	xylitol
DF	36.000	36.000	36.000	36.000	36.000	36.000	36.000
R2	0.893	0.810	0.909	0.931	0.857	0.870	0.869
SS	0.022	0.071	0.011	0.075	0.041	0.128	0.086
Sy.x	0.025	0.044	0.017	0.046	0.034	0.060	0.049
30 °C	control	fructose	galactose	glucose	lactose	sucrose	xylitol
DF	36.000	36.000	36.000	36.000	36.000	36.000	36.000
R2	0.944	0.982	0.957	0.982	0.919	0.986	0.947
SS	0.024	0.028	0.010	0.033	0.036	0.019	0.028
Sy.x	0.026	0.028	0.017	0.030	0.032	0.023	0.028
25 °C	control	fructose	galactose	glucose	lactose	sucrose	xylitol
DF	36.000	–	–	–	36.000	36.000	36.000
R2	0.931	–	–	–	0.899	0.951	0.918
SS	0.022	–	–	–	0.034	0.019	0.024
Sy.x	0.025	–	–	–	0.031	0.023	0.026
20 °C	control	fructose	galactose	glucose	lactose	sucrose	xylitol
DF	36.000	–	–	–	36.000	36.000	36.000
R2	0.942	–	–	–	0.951	0.954	0.943
SS	0.016	–	–	–	0.013	0.013	0.016
Sy.x	0.021	–	–	–	0.019	0.019	0.021
15 °C	control	fructose	galactose	glucose	lactose	sucrose	xylitol
DF	36.000	–	36.000	–	36.000	36.000	36.000
R2	0.675	–	0.138	–	0.489	0.746	0.715
SS	0.002	–	0.001	–	0.002	0.001	0.002
Sy.x	0.007	–	0.005	–	0.007	0.005	0.006
Note: DF, degrees of freedom; R2, coefficient of determination; SS, residual sum of square; and Sy.x, standard error of the estimate. ”–”, indicates parameters not calculated due to insufficient fit to the Gompertz model.

## Sheet: Supplementary Table S4
Supplementary Table S4. Complete RNA-seq results for B. cereus grown with different carbohydrates.
gene_id	baseMean	log2FoldChange	lfcSE	pvalue	padj	substrate
LMD38_RS00005	42.2088	-0.441669	0.621916	0.324425	0.518344	fru
LMD38_RS00010	10.1732	-0.536659	0.758726	0.227399	1	fru
LMD38_RS00015	137.065	-1.03232	0.419078	0.00490336	0.0279209	fru
LMD38_RS00020	38.4381	0.216918	0.597622	0.624303	0.74864	fru
LMD38_RS00025	204.046	-1.72683	0.437296	3.59395e-06	6.54324e-05	fru
LMD38_RS00030	2157.79	1.26297	0.268022	6.55459e-07	1.52029e-05	fru
LMD38_RS00035	328.236	0.165981	0.286564	0.539692	0.693576	fru
LMD38_RS00040	97.0525	-0.261555	0.751545	0.54532	0.697542	fru
LMD38_RS00045	97.6474	-0.762224	0.634299	0.0936435	0.241699	fru
LMD38_RS00050	96.7869	-0.491993	0.361921	0.135195	0.307503	fru
LMD38_RS00055	127.112	0.109494	0.395527	0.756332	0.845459	fru
LMD38_RS00060	100.165	-0.431716	0.584431	0.327839	0.520992	fru
LMD38_RS00065	278.522	-0.55433	0.333331	0.0718432	0.203264	fru
LMD38_RS00070	26.2369	0.343563	0.729653	0.436571	1	fru
LMD38_RS00075	247.469	-0.708813	0.528435	0.0948219	0.243504	fru
LMD38_RS00080	94.7953	-0.825956	0.492308	0.0431156	0.142432	fru
LMD38_RS00085	150.28	-0.643672	0.61974	0.152917	0.332892	fru
LMD38_RS00090	906.289	-2.01235	0.368964	6.62492e-10	3.28014e-08	fru
LMD38_RS00095	294.383	-0.979735	0.262492	8.80242e-05	0.000998263	fru
LMD38_RS00100	245.307	-0.78763	0.35834	0.015817	0.0680985	fru
LMD38_RS00105	224.63	-1.06402	0.368642	0.00140007	0.00995495	fru
LMD38_RS00110	559.573	-1.60391	0.294923	5.00416e-09	1.98084e-07	fru
LMD38_RS00115	91.6921	-0.817281	0.432046	0.029542	0.109136	fru
LMD38_RS00120	1258.67	-0.52983	0.407486	0.141734	0.315656	fru
LMD38_RS00125	1648.83	0.158582	0.388556	0.648761	0.765911	fru
LMD38_RS00135	53.4086	-0.827442	0.610226	0.0664295	0.192371	fru
LMD38_RS00140	319.581	0.0804366	0.412381	0.825041	0.891875	fru
LMD38_RS00145	3299.14	1.18255	0.444892	0.00195421	0.0129642	fru
LMD38_RS00150	1863.1	0.906833	0.36412	0.00604687	0.0322606	fru
LMD38_RS00155	1547.41	0.936782	0.377525	0.00582768	0.0315053	fru
LMD38_RS00160	1445.95	-0.207791	0.365532	0.531451	0.68782	fru
LMD38_RS00170	3409.57	0.15767	0.505533	0.703407	0.808527	fru
LMD38_RS00175	67.1933	-0.6138	0.63287	0.17442	0.359384	fru
LMD38_RS00180	655.696	0.775524	0.300207	0.00587966	0.0316283	fru
LMD38_RS00185	208.963	0.524278	0.315038	0.074226	0.207546	fru
LMD38_RS00190	131.483	-0.712819	0.500075	0.083656	0.225078	fru
LMD38_RS00195	50.8198	-1.54032	0.501123	0.000171038	0.00175801	fru
LMD38_RS00200	367.035	0.671334	0.289442	0.0138735	0.0616937	fru
LMD38_RS00205	83.6551	-0.0239044	0.568633	0.956293	0.976742	fru
LMD38_RS00210	85.2401	-0.164272	0.558414	0.704702	0.809248	fru
LMD38_RS00215	229.749	0.477197	0.364469	0.149613	0.328162	fru
LMD38_RS00220	81.1672	-0.627345	0.42355	0.090545	0.236255	fru
LMD38_RS00225	76.5725	-0.411652	0.746103	NA	1	fru
LMD38_RS00230	1929.61	-0.21828	0.44197	0.567549	0.711664	fru
LMD38_RS00235	316.224	0.293601	0.390849	0.401131	0.584018	fru
LMD38_RS00240	561.708	0.0121196	0.281276	0.963692	0.981007	fru
LMD38_RS00245	875.991	1.27869	0.33253	2.85267e-05	0.000384779	fru
LMD38_RS00250	1352.31	-0.111232	0.322768	0.710711	0.81373	fru
LMD38_RS00255	652.452	0.915568	0.357761	0.00493831	0.0280413	fru
LMD38_RS00260	14.1872	-1.47266	0.910953	0.00448801	1	fru
LMD38_RS00265	273.572	-0.420234	0.412868	0.24843	0.445288	fru
LMD38_RS00270	147.029	-0.0366283	0.376685	0.914204	0.950238	fru
LMD38_RS00275	1331.93	0.499025	0.340858	0.111682	0.270542	fru
LMD38_RS00280	110.472	-0.155463	0.436738	0.681492	0.792863	fru
LMD38_RS00285	1046.7	0.478302	0.477732	0.233205	0.425657	fru
LMD38_RS00290	564.971	0.688436	0.43317	0.0674292	0.194439	fru
LMD38_RS00295	2562.33	0.414976	0.348519	0.194029	0.38525	fru
LMD38_RS00300	4248.73	1.60814	0.486651	6.26798e-05	0.000757381	fru
LMD38_RS00305	10886.6	0.726565	0.491567	0.0749798	0.209366	fru
LMD38_RS00310	6064.26	-0.0275199	0.514918	0.947514	0.972177	fru
LMD38_RS00315	34.8317	-0.356415	0.610463	0.424016	0.604461	fru
LMD38_RS00320	83.8838	-1.01919	0.412893	0.00499956	0.0282338	fru
LMD38_RS00325	236.971	-0.81743	0.533672	0.0553509	0.16922	fru
LMD38_RS00330	67.17	-0.485103	0.720914	0.279582	0.475535	fru
LMD38_RS00335	25.0211	-0.417396	0.816011	0.316287	1	fru
LMD38_RS00340	20.9328	-0.968522	0.788151	0.0404388	1	fru
LMD38_RS00345	97.6392	-0.0991888	0.646268	0.824489	0.891875	fru
LMD38_RS00350	57.0914	0.00579595	0.685584	0.989602	0.99524	fru
LMD38_RS00355	27.5071	-0.692436	0.711651	0.130736	0.300932	fru
LMD38_RS00360	46.9005	-0.431349	0.774315	0.31987	0.5148	fru
LMD38_RS00365	9.43913	-0.621399	0.877051	0.135914	1	fru
LMD38_RS00370	160.524	-0.727379	0.571917	0.0980494	0.248956	fru
LMD38_RS00375	101.211	-0.681928	0.691513	0.136414	0.309063	fru
LMD38_RS00380	78.0761	-0.529405	0.678163	0.242737	0.438981	fru
LMD38_RS00385	41.4317	-0.944858	0.618072	0.0375023	0.128164	fru
LMD38_RS00390	762.088	-0.518555	0.443376	0.175294	0.360351	fru
LMD38_RS00395	1052.37	-0.0595628	0.381765	0.862342	0.916281	fru
LMD38_RS00400	124.847	-0.386596	0.511429	0.353688	0.544947	fru
LMD38_RS00405	66.6386	-0.245007	0.729537	NA	1	fru
LMD38_RS00410	70.7982	-0.244642	0.637102	0.58483	0.722144	fru
LMD38_RS00415	7.44651	-0.118657	0.914493	0.696887	1	fru
LMD38_RS00420	310.875	-1.26616	0.45608	0.00109267	0.00815488	fru
LMD38_RS00425	20.9551	-0.569614	0.802423	0.191506	1	fru
LMD38_RS00430	39.1356	-0.917412	0.638211	0.0452639	0.147461	fru
LMD38_RS00435	428.265	0.281521	0.387066	0.417359	0.60024	fru
LMD38_RS00440	452.263	0.356154	0.358329	0.275768	0.471021	fru
LMD38_RS00445	174.255	0.298184	0.385323	0.388694	0.573506	fru
LMD38_RS00450	37.5734	0.605746	0.540238	0.157553	0.337836	fru
LMD38_RS00455	33.8054	0.126443	0.466705	0.749181	0.841578	fru
LMD38_RS00460	20.8382	-0.184551	0.624761	0.679351	1	fru
LMD38_RS00465	6.61507	-0.0416006	0.825627	0.914258	1	fru
LMD38_RS00505	8.49985	1.84851	1.36366	0.000996777	1	fru
LMD38_RS00510	114.41	-0.332486	0.409544	0.358381	0.547827	fru
LMD38_RS00545	94.0913	0.321033	0.578393	0.46484	0.638513	fru
LMD38_RS00550	691.459	-0.348734	0.301558	0.217731	0.409633	fru
LMD38_RS00555	103.665	-0.213291	0.410488	0.55642	0.704136	fru
LMD38_RS00575	171.64	-0.164648	0.609051	0.711111	0.813958	fru
LMD38_RS00580	243.127	-0.434155	0.564592	NA	1	fru
LMD38_RS00585	32.1607	-0.0433604	0.547524	0.919679	0.954473	fru
LMD38_RS00590	128.97	-0.137994	0.574501	0.752591	0.842153	fru
LMD38_RS00595	140.983	-0.651441	0.542878	0.129495	0.298864	fru
LMD38_RS00600	785.047	-0.479427	0.239136	0.0370317	0.127306	fru
LMD38_RS00605	214.158	0.527063	0.338571	0.0911242	0.236914	fru
LMD38_RS00610	710.881	0.711342	0.2596	0.00407226	0.023789	fru
LMD38_RS00625	123.531	-0.459542	0.689906	0.308145	0.50143	fru
LMD38_RS00630	62.7181	-0.0845334	0.647599	0.850076	0.907761	fru
LMD38_RS00635	177.976	-0.05421	0.381681	0.874585	0.925683	fru
LMD38_RS00640	8.24199	-0.0784578	0.856363	0.828715	1	fru
LMD38_RS00645	12.606	-0.109028	0.777975	0.793632	1	fru
LMD38_RS00650	58.1392	0.634038	0.659028	0.163549	0.346638	fru
LMD38_RS00655	764.154	0.596778	0.286322	0.0272612	0.102767	fru
LMD38_RS00660	141.523	-0.427373	0.453691	0.271258	0.467152	fru
LMD38_RS00665	0.296383	0.097833	0.985238	0.591979	1	fru
LMD38_RS00675	1.54312	0.198025	0.993138	0.314022	1	fru
LMD38_RS00680	64.1453	-0.959419	0.453006	0.0132759	0.0599362	fru
LMD38_RS00685	937.556	0.45168	0.412287	0.214292	0.405795	fru
LMD38_RS00690	180.457	-0.491674	0.492174	0.228486	0.420799	fru
LMD38_RS00695	147.694	-0.780176	0.401215	0.028496	0.106336	fru
LMD38_RS00700	134.755	-1.12624	0.393619	0.00129222	0.00937136	fru
LMD38_RS00705	196.433	0.168471	0.523286	0.689343	0.797949	fru
LMD38_RS00710	3687.78	1.43236	0.389839	3.37452e-05	0.000446272	fru
LMD38_RS00715	154.223	-0.671131	0.455369	0.0847077	0.226408	fru
LMD38_RS00720	1668.67	-0.213096	0.40779	0.554887	0.703365	fru
LMD38_RS00725	142.335	-0.338139	0.330961	0.269499	0.466487	fru
LMD38_RS00730	220.349	-0.329185	0.434945	0.383462	0.570069	fru
LMD38_RS00735	61.4645	-0.245723	0.510601	0.55507	0.703365	fru
LMD38_RS00740	803.947	-0.802055	0.324579	0.00768822	0.0389408	fru
LMD38_RS00750	259.356	0.121851	0.351017	0.704641	0.809248	fru
LMD38_RS00755	109.063	-0.363199	0.75168	0.405588	0.587893	fru
LMD38_RS00760	88.9832	-0.717712	0.654884	0.115993	0.277913	fru
LMD38_RS00765	68.163	-0.472777	0.758536	0.283386	0.479594	fru
LMD38_RS00770	63.9541	-0.21545	0.598148	0.62672	0.749921	fru
LMD38_RS00775	135.018	-0.515588	0.450539	0.182406	0.370079	fru
LMD38_RS00780	40.1983	-1.21583	0.59954	0.00711619	0.0367781	fru
LMD38_RS00785	204.806	-0.755262	0.59307	0.0902366	0.235752	fru
LMD38_RS00790	567.189	-1.11295	0.375575	0.000983133	0.00744687	fru
LMD38_RS00795	435.495	-1.99557	0.339518	6.1575e-11	4.31025e-09	fru
LMD38_RS00800	106.144	-0.656011	0.691208	0.151152	0.330769	fru
LMD38_RS00805	30.7629	0.0818902	0.513625	0.844508	0.903717	fru
LMD38_RS00810	133.56	-0.855485	0.428283	0.0218859	0.0873715	fru
LMD38_RS00815	166.657	-0.592593	0.609245	0.185722	0.37458	fru
LMD38_RS00820	37.4977	-0.512228	0.824658	0.225612	0.417496	fru
LMD38_RS00825	215.308	-1.45921	0.510503	0.000438662	0.00376749	fru
LMD38_RS00830	177.646	-0.865916	0.321668	0.0037245	0.0221993	fru
LMD38_RS00835	7339.56	-0.366696	0.456675	0.347231	0.538281	fru
LMD38_RS00840	2906.6	-0.48094	0.472188	0.22734	0.419355	fru
LMD38_RS00845	1106.3	3.97368	0.764287	4.81606e-10	2.50682e-08	fru
LMD38_RS00850	4107.93	3.07235	0.63795	2.10894e-09	9.30683e-08	fru
LMD38_RS00855	604.944	5.04135	0.789818	NA	1	fru
LMD38_RS00860	14173	3.52709	0.682778	4.89159e-10	2.51391e-08	fru
LMD38_RS00865	720.862	4.36819	0.484877	1.86257e-21	6.87456e-19	fru
LMD38_RS00870	125.228	-0.582485	0.673254	0.200019	0.392308	fru
LMD38_RS00875	57.7512	-0.581269	0.669774	0.200831	0.392952	fru
LMD38_RS00880	552.24	-0.55134	0.219163	0.00932059	0.0454827	fru
LMD38_RS00885	69.9345	-0.567172	0.702628	0.211151	0.402744	fru
LMD38_RS00890	835.103	-0.253527	0.395186	0.472147	0.644775	fru
LMD38_RS00895	178.953	-0.236984	0.671085	0.596594	0.730295	fru
LMD38_RS00900	852.061	0.645321	0.38875	0.0637183	0.185712	fru
LMD38_RS00905	356.228	0.479466	0.245218	0.0415358	0.138795	fru
LMD38_RS00910	180.928	0.294309	0.347669	0.356111	0.54637	fru
LMD38_RS00915	282.525	-0.282872	0.334717	0.360162	0.549927	fru
LMD38_RS00920	514.12	0.14056	0.44329	0.713331	0.81558	fru
LMD38_RS00925	448.536	0.738709	0.367	0.0264099	0.10025	fru
LMD38_RS00930	141.667	-0.519813	0.682142	0.251058	0.446637	fru
LMD38_RS00935	77.3569	-0.652378	0.623519	0.148128	0.325786	fru
LMD38_RS00940	119.464	-0.936778	0.44916	0.0150507	0.0654163	fru
LMD38_RS00945	49970.4	-0.781083	0.492028	0.0557196	0.169836	fru
LMD38_RS00985	7617.28	0.759471	0.464992	0.0541878	0.16743	fru
LMD38_RS00990	2062.27	1.3415	0.337514	1.41109e-05	0.000212187	fru
LMD38_RS00995	201.542	1.3133	0.371777	8.40946e-05	0.000961758	fru
LMD38_RS01000	206.101	0.514756	0.418184	0.1612	0.343554	fru
LMD38_RS01005	576.056	0.795644	0.321211	0.00764414	0.0388912	fru
LMD38_RS01010	1445.76	1.00757	0.315884	0.000601919	0.00491708	fru
LMD38_RS01015	312.594	-0.224328	0.272582	0.386238	0.571475	fru
LMD38_RS01020	206.142	-0.651586	0.482864	0.106601	0.262544	fru
LMD38_RS01025	17.5554	-0.391554	0.760111	0.368769	1	fru
LMD38_RS01030	43.3871	0.0375546	0.586393	0.932037	0.960757	fru
LMD38_RS01035	58.3642	0.326284	0.601678	0.462577	0.636416	fru
LMD38_RS01040	27.3025	0.0626926	0.648979	0.888501	0.934053	fru
LMD38_RS01045	106.741	-0.63683	0.573398	0.14739	0.325175	fru
LMD38_RS01050	1887.27	0.701607	0.403846	0.0500434	0.159007	fru
LMD38_RS01055	54.0902	-0.496039	0.476504	0.215619	0.407549	fru
LMD38_RS01065	40.7623	-0.740015	0.633554	0.103214	0.257559	fru
LMD38_RS01070	33.1484	-0.50806	0.56561	0.244564	0.441106	fru
LMD38_RS01075	195.538	-1.62949	0.331439	7.03145e-08	2.05379e-06	fru
LMD38_RS01080	119.976	-0.903865	0.315685	0.00209159	0.0137855	fru
LMD38_RS01100	1721.02	0.286772	0.382723	0.404677	0.586991	fru
LMD38_RS01105	10018	0.0571908	0.456818	0.883468	0.931106	fru
LMD38_RS01115	23.264	0.0415163	0.700116	0.925249	1	fru
LMD38_RS01120	91.6855	0.0217697	0.538497	0.959337	0.97862	fru
LMD38_RS01125	338.965	0.462159	0.277968	0.0793213	0.217598	fru
LMD38_RS01130	436.206	0.325615	0.244553	0.165324	0.348683	fru
LMD38_RS01135	50.6454	0.617621	0.548943	0.152543	0.332612	fru
LMD38_RS01140	100.487	-0.435577	0.409233	0.22858	0.420799	fru
LMD38_RS01145	787.738	0.281291	0.258713	0.254833	0.450619	fru
LMD38_RS01150	1380.4	0.718332	0.337883	0.0210097	0.0846226	fru
LMD38_RS01155	80.3935	-0.35345	0.66134	0.431837	0.610254	fru
LMD38_RS01160	541.986	0.436256	0.407542	0.226453	0.418594	fru
LMD38_RS01165	1203.05	1.22913	0.265495	1.06124e-06	2.29182e-05	fru
LMD38_RS01170	1104.04	0.924328	0.34193	0.00323882	0.0198173	fru
LMD38_RS01175	317.622	1.09546	0.306825	0.000129852	0.00140212	fru
LMD38_RS01180	85.9809	2.14976	0.770567	4.24207e-05	0.000545025	fru
LMD38_RS01185	1404.86	-0.226025	0.401958	0.526776	0.685925	fru
LMD38_RS01190	33.2663	-0.290119	0.756176	0.501877	0.668304	fru
LMD38_RS01195	7.04935	0.0658371	0.857547	0.855347	1	fru
LMD38_RS01200	5.87596	0.227278	0.921652	0.466541	1	fru
LMD38_RS01205	55.4164	-0.508276	0.769351	0.248285	0.445247	fru
LMD38_RS01210	14.749	0.0137861	0.820059	0.971809	1	fru
LMD38_RS01215	74.2767	-0.397548	0.728246	0.370484	0.559585	fru
LMD38_RS01220	11.1845	-0.303037	0.830051	0.446765	1	fru
LMD38_RS01235	0.460851	-0.077186	0.984162	0.669649	1	fru
LMD38_RS01290	2110.1	0.399988	0.41811	0.276311	0.471156	fru
LMD38_RS01295	1220.14	0.441563	0.505379	0.286479	0.482984	fru
LMD38_RS01300	9495.86	2.32448	0.380794	3.13628e-12	2.65277e-10	fru
LMD38_RS01305	20846.5	2.48219	0.643079	3.24557e-07	8.03476e-06	fru
LMD38_RS01310	30099.4	2.92277	0.634843	5.99809e-09	2.21384e-07	fru
LMD38_RS01315	19569.7	2.10018	0.651183	1.17582e-05	0.000181514	fru
LMD38_RS01320	62688.4	2.17488	0.638228	4.72658e-06	8.20082e-05	fru
LMD38_RS01325	29069.6	1.7001	0.575004	0.000127519	0.00138429	fru
LMD38_RS01330	84.6608	-0.26668	0.619766	0.55027	0.701046	fru
LMD38_RS01335	96.3903	-0.471474	0.538424	0.27017	0.466487	fru
LMD38_RS01340	95.6746	1.16043	0.513854	0.00550107	0.0304551	fru
LMD38_RS01345	66.0276	-0.290525	0.537886	0.496268	0.664308	fru
LMD38_RS01350	369.543	0.221535	0.356903	0.496493	0.664391	fru
LMD38_RS01355	1864.04	0.189195	0.374485	0.576122	0.715089	fru
LMD38_RS01360	86.7653	0.540065	0.635566	0.231256	0.42331	fru
LMD38_RS01365	1395474	-2.01408	0.71051	5.66008e-05	0.000692167	fru
LMD38_RS01370	130.448	-0.913778	0.453256	0.0184307	0.0764275	fru
LMD38_RS01375	365.552	0.761434	0.430765	0.0422449	0.140701	fru
LMD38_RS01380	278.476	-0.120716	0.445674	0.753219	0.842443	fru
LMD38_RS01385	161.855	-0.455794	0.505217	0.271164	0.467152	fru
LMD38_RS01390	167.505	-0.538808	0.336349	0.0824558	0.223478	fru
LMD38_RS01395	92.9673	-0.94491	0.582458	0.0334603	0.118514	fru
LMD38_RS01400	25.0007	-0.073705	0.733603	0.865227	1	fru
LMD38_RS01420	165.675	-1.20807	0.46744	0.00219087	0.0143931	fru
LMD38_RS01425	29.4061	-0.597704	0.724922	0.187152	0.37653	fru
LMD38_RS01430	14.4653	0.0850987	0.758465	0.841395	1	fru
LMD38_RS01435	41.22	0.15159	0.691526	0.733189	0.830616	fru
LMD38_RS01440	34.2549	0.142605	0.701679	0.747488	0.840971	fru
LMD38_RS01445	169.537	-0.813497	0.518915	0.0530477	0.165037	fru
LMD38_RS01450	105.675	-0.572633	0.403641	0.109751	0.267536	fru
LMD38_RS01455	97.0036	-0.820928	0.356643	0.0115638	0.0538406	fru
LMD38_RS01460	1207.33	0.379919	0.412886	0.296779	0.492207	fru
LMD38_RS01465	4381.43	0.254898	0.457615	0.514055	0.678059	fru
LMD38_RS01470	1455.17	0.0190964	0.40579	0.957651	0.977836	fru
LMD38_RS01475	590.092	-0.768443	0.4652	0.0514655	0.161977	fru
LMD38_RS01480	45.1716	0.0786546	0.673206	NA	1	fru
LMD38_RS01485	133.66	-0.0542734	0.515389	0.896753	0.938784	fru
LMD38_RS01490	719.987	1.40838	0.383369	3.67592e-05	0.000480727	fru
LMD38_RS01495	64.7322	-0.504226	0.611806	0.259665	0.45638	fru
LMD38_RS01500	302.564	-1.31229	0.479642	0.00104513	0.00784328	fru
LMD38_RS01505	91.8849	-0.473056	0.620137	0.29133	0.48695	fru
LMD38_RS01510	231.475	0.40576	0.350057	0.205743	0.398149	fru
LMD38_RS01515	1183.16	0.328002	0.255985	0.180044	0.366038	fru
LMD38_RS01520	135.819	-0.536293	0.617488	0.231918	0.42433	fru
LMD38_RS01525	920.742	-1.96276	0.341118	1.52477e-10	9.67274e-09	fru
LMD38_RS01530	17.489	-0.426778	0.759888	0.329511	1	fru
LMD38_RS01535	515.043	-0.218599	0.456843	0.57533	0.714518	fru
LMD38_RS01540	147.834	-0.732704	0.524884	0.0831844	0.224404	fru
LMD38_RS01545	373.39	1.3692	0.390898	7.82285e-05	0.000907451	fru
LMD38_RS01550	19.7419	-0.0906981	0.814277	0.818546	1	fru
LMD38_RS01555	26.7847	-1.88287	0.664804	9.04551e-05	1	fru
LMD38_RS01560	3520.24	-2.79487	0.495932	2.22249e-11	1.70251e-09	fru
LMD38_RS01565	244.519	0.108131	0.38038	0.752257	0.842153	fru
LMD38_RS01570	99.2517	-0.458212	0.641235	0.309051	0.502182	fru
LMD38_RS01575	200.509	-1.0211	0.538245	0.0172371	0.0723711	fru
LMD38_RS01580	51.1483	-0.680255	0.69792	0.13737	0.309673	fru
LMD38_RS01585	155.374	-1.64297	0.403456	3.12721e-06	5.82407e-05	fru
LMD38_RS01590	157.899	-1.59249	0.452976	3.24903e-05	0.000432493	fru
LMD38_RS01595	655.329	-1.44292	0.248365	1.06693e-09	5.09615e-08	fru
LMD38_RS01600	21.8912	0.219543	0.751737	0.610469	1	fru
LMD38_RS01605	365.273	-0.125949	0.232459	0.573971	0.713947	fru
LMD38_RS01610	1821.85	1.05242	0.358236	0.00122975	0.00902858	fru
LMD38_RS01615	119.205	-0.61584	0.505404	0.137291	0.309673	fru
LMD38_RS01620	276.856	-0.665419	0.394254	0.0585146	0.176238	fru
LMD38_RS01625	7.18086	-0.153343	0.842132	0.685123	1	fru
LMD38_RS01630	71.848	-0.249813	0.725507	0.569948	0.712655	fru
LMD38_RS01635	187.863	-0.438264	0.385138	0.204942	0.397166	fru
LMD38_RS01640	160.495	-0.785651	0.391553	0.0246749	0.0960407	fru
LMD38_RS01645	41.503	-0.460505	0.691966	0.307019	0.500062	fru
LMD38_RS01650	24.4822	-0.508019	0.763754	0.250001	1	fru
LMD38_RS01655	374.112	1.02424	0.26119	3.80423e-05	0.000495037	fru
LMD38_RS01660	58.6956	0.36006	0.479124	0.370288	0.559585	fru
LMD38_RS01665	371.862	0.491189	0.263764	0.0506528	0.160289	fru
LMD38_RS01670	356.282	0.228029	0.402973	0.52389	0.68519	fru
LMD38_RS01675	44.0699	1.00261	0.687115	0.0323527	0.115933	fru
LMD38_RS01705	349.011	-1.19908	0.480237	0.00280702	0.0176144	fru
LMD38_RS01710	245.101	-0.688279	0.336231	0.0264204	0.10025	fru
LMD38_RS01715	57.5053	-0.198575	0.619474	0.656157	0.772173	fru
LMD38_RS01720	623.361	0.347859	0.325907	0.249858	0.445704	fru
LMD38_RS01730	285.988	0.230695	0.312445	0.429054	0.60929	fru
LMD38_RS01735	224.34	-0.0285361	0.553317	0.947311	0.972177	fru
LMD38_RS01740	155.154	-1.4642	0.555047	0.000772276	0.00607643	fru
LMD38_RS01750	98.3826	-1.13924	0.46098	0.00359001	0.0216574	fru
LMD38_RS01755	299.073	-0.438582	0.493306	0.283313	0.479594	fru
LMD38_RS01760	135.024	-0.00214837	0.412859	0.995293	0.997768	fru
LMD38_RS01765	24.8884	0.0116918	0.787802	0.977269	1	fru
LMD38_RS01770	657.897	-2.50967	0.48438	4.3895e-10	2.34491e-08	fru
LMD38_RS01775	117.252	-1.05082	0.354458	0.0011361	0.00846342	fru
LMD38_RS01780	23.6722	-0.458888	0.793585	0.284975	1	fru
LMD38_RS01785	1606.35	-0.613789	0.321803	0.0400586	0.13486	fru
LMD38_RS01790	727.475	-0.53242	0.357612	0.102602	0.25698	fru
LMD38_RS01795	4541.97	-0.120106	0.510823	0.772998	0.857244	fru
LMD38_RS01800	61.582	-0.296406	0.640716	0.508628	0.674185	fru
LMD38_RS01805	80.9453	-0.418644	0.680492	0.352635	0.544003	fru
LMD38_RS01810	55.7581	0.283946	0.677163	0.526202	0.685616	fru
LMD38_RS01825	27.7075	-0.27565	0.62682	0.537671	0.692243	fru
LMD38_RS01830	26.2732	-0.761673	0.75692	0.0973959	1	fru
LMD38_RS01835	18716.7	0.445694	0.542846	0.298933	0.494366	fru
LMD38_RS01840	9280.22	1.06733	0.483081	0.0081333	0.0408173	fru
LMD38_RS01845	217.503	1.28317	0.625075	NA	1	fru
LMD38_RS01850	160.75	0.410625	0.362687	0.213285	0.404832	fru
LMD38_RS01860	484.256	-0.0802949	0.34796	0.801377	0.875869	fru
LMD38_RS01865	662.918	0.400282	0.40827	0.267727	0.464915	fru
LMD38_RS01870	89.5815	0.36762	0.431228	0.327546	0.520992	fru
LMD38_RS01875	160.935	0.89622	0.452916	0.0207529	0.0838375	fru
LMD38_RS01880	72.3753	-0.285674	0.609135	0.521026	0.682906	fru
LMD38_RS01885	628.755	0.618967	0.29777	0.0269099	0.101726	fru
LMD38_RS01890	256.837	0.169629	0.351921	0.598467	0.730877	fru
LMD38_RS01895	843.667	1.73136	0.394744	5.53514e-07	1.30655e-05	fru
LMD38_RS01900	151.907	0.872161	0.438073	0.0213923	0.085738	fru
LMD38_RS01905	746.039	0.466433	0.409254	0.197286	0.389354	fru
LMD38_RS01910	2539.04	0.994543	0.468102	0.0119508	0.0551995	fru
LMD38_RS01915	2740.08	2.08766	0.405545	2.45224e-09	1.0371e-07	fru
LMD38_RS01920	3398.93	1.58597	0.522789	0.000160871	0.00167043	fru
LMD38_RS01925	4748.37	1.63995	0.451453	1.75387e-05	0.00025073	fru
LMD38_RS01930	91.7395	-0.252893	0.533292	0.552096	0.701926	fru
LMD38_RS01935	63.8808	-0.0892993	0.593526	0.839825	0.900367	fru
LMD38_RS01940	322.413	0.533064	0.405019	0.137561	0.309884	fru
LMD38_RS01945	102.576	1.78342	0.613973	0.000106689	0.00118026	fru
LMD38_RS01950	59.635	-0.491672	0.722008	0.273248	0.468689	fru
LMD38_RS01955	64.0483	-0.398987	0.600558	0.369317	0.558862	fru
LMD38_RS01960	3299.01	1.1852	0.412296	0.00105701	0.00791781	fru
LMD38_RS01965	150.323	0.469946	0.372731	0.163269	0.346638	fru
LMD38_RS01970	176.595	-0.203684	0.343807	0.519276	0.681844	fru
LMD38_RS01975	53.7994	-0.705863	0.637906	0.120175	0.285627	fru
LMD38_RS01980	97.5717	-0.290042	0.504975	0.483526	0.652631	fru
LMD38_RS01985	137.452	-0.0599821	0.347842	0.850895	0.908397	fru
LMD38_RS01990	49.1682	-0.155261	0.645951	0.728633	0.826788	fru
LMD38_RS01995	26.7647	-0.0520801	0.764222	0.901871	1	fru
LMD38_RS02000	27.2937	-0.654975	0.715647	0.151282	0.330769	fru
LMD38_RS02005	151.355	0.852686	0.375779	0.0118276	0.0548172	fru
LMD38_RS02010	512.554	0.717451	0.273977	0.00576943	0.0313154	fru
LMD38_RS02015	1043.58	-0.275158	0.455523	0.479894	0.65054	fru
LMD38_RS02020	304.527	-0.119921	0.326733	0.692262	0.799597	fru
LMD38_RS02025	230.778	-0.77577	0.36218	0.018448	0.0764275	fru
LMD38_RS02030	244.533	0.437134	0.325309	0.147503	0.325175	fru
LMD38_RS02035	99.3812	-1.3518	0.448541	0.000413534	0.00363408	fru
LMD38_RS02040	132.9	-0.630282	0.570678	0.150824	0.330462	fru
LMD38_RS02045	97.5351	-0.266705	0.641702	0.551808	0.701926	fru
LMD38_RS02050	153.038	-0.938979	0.54866	0.0299964	0.110014	fru
LMD38_RS02055	36.8656	0.245226	0.723595	0.577356	0.715745	fru
LMD38_RS02060	47.3666	0.0875577	0.617781	0.844166	0.903717	fru
LMD38_RS02065	97.3296	-0.435486	0.584718	0.323732	0.518201	fru
LMD38_RS02070	32.4578	-0.446664	0.684405	0.321864	0.516551	fru
LMD38_RS02075	1037.8	1.28777	0.40351	0.000292848	0.00272074	fru
LMD38_RS02080	257.976	-0.564851	0.30828	0.0500519	0.159007	fru
LMD38_RS02085	130.279	-0.595002	0.559354	0.171451	0.355692	fru
LMD38_RS02090	92.8751	-1.26021	0.516828	0.00263662	0.0166999	fru
LMD38_RS02120	108.223	-0.600183	0.663144	0.186724	0.375899	fru
LMD38_RS02130	79.6131	-0.517336	0.46611	0.190512	0.380649	fru
LMD38_RS02135	53.5459	-0.126136	0.70914	0.774997	0.859227	fru
LMD38_RS02140	71.2733	0.122408	0.625769	0.783879	0.865276	fru
LMD38_RS02145	5.79007	-0.0550145	0.862693	0.877238	1	fru
LMD38_RS02150	203.567	-0.434147	0.283531	0.105324	0.260682	fru
LMD38_RS02155	49.0174	-0.291894	0.66941	0.515204	0.679106	fru
LMD38_RS02160	462.747	0.855488	0.254501	0.000433539	0.00375655	fru
LMD38_RS02165	638.591	0.545805	0.370985	0.104072	0.258904	fru
LMD38_RS02170	36.4642	-0.436385	0.642549	0.332434	0.523742	fru
LMD38_RS02175	47.0798	0.278672	0.796371	0.501632	0.668304	fru
LMD38_RS02180	93.1876	0.090485	0.680317	NA	1	fru
LMD38_RS02185	574.57	0.748932	0.478711	0.0622392	0.183126	fru
LMD38_RS02190	24.1975	0.249204	0.722443	0.571523	1	fru
LMD38_RS02195	90.6822	-0.236892	0.664482	0.596986	0.730489	fru
LMD38_RS02200	86.4259	-0.255465	0.515692	0.541558	0.694261	fru
LMD38_RS02205	754.034	-0.477549	0.488208	0.239941	0.435671	fru
LMD38_RS02210	290.632	0.520488	0.299756	0.0643629	0.186919	fru
LMD38_RS02215	180.049	-0.709961	0.32112	0.0173201	0.0725693	fru
LMD38_RS02220	121.434	-1.08543	0.559239	0.0130069	0.0590694	fru
LMD38_RS02225	52.5281	-0.484048	0.470352	0.223241	0.415	fru
LMD38_RS02230	86.8386	-0.589301	0.647106	0.193445	0.384732	fru
LMD38_RS02235	1442.53	0.27783	0.412758	0.445395	0.621615	fru
LMD38_RS02240	47.3934	-0.229924	0.792528	0.578521	0.716533	fru
LMD38_RS02245	187.426	0.674235	0.378747	0.0480942	0.154847	fru
LMD38_RS02250	1413.27	0.293505	0.437942	0.439263	0.617333	fru
LMD38_RS02255	50.6142	-0.108274	0.607659	0.807422	0.880745	fru
LMD38_RS02260	65.2717	-0.670829	0.699263	0.142592	0.317218	fru
LMD38_RS02265	127.861	-0.370844	0.333884	0.229276	0.421395	fru
LMD38_RS02270	1781.8	0.522741	0.441304	0.170486	0.354961	fru
LMD38_RS02275	104.724	-0.0360222	0.495016	0.929888	0.959427	fru
LMD38_RS02280	46.8358	-0.110157	0.704255	0.80324	0.877598	fru
LMD38_RS02285	166.067	0.0425586	0.36066	0.896932	0.938784	fru
LMD38_RS02290	82.2939	-0.773902	0.661126	0.0915377	0.23732	fru
LMD38_RS02295	26.0983	0.501776	0.573484	0.252833	1	fru
LMD38_RS02300	28.8757	-0.424234	0.717237	0.34243	0.533462	fru
LMD38_RS02305	96.7293	-1.11841	0.474332	0.00501263	0.0282657	fru
LMD38_RS02310	133.405	-0.617515	0.345789	0.0516655	0.16248	fru
LMD38_RS02315	33.3792	-0.50024	0.690879	0.268439	0.465554	fru
LMD38_RS02320	43.1907	-0.558665	0.700093	0.217913	0.409784	fru
LMD38_RS02325	292.276	0.500195	0.370926	0.136321	0.309024	fru
LMD38_RS02330	129.949	-0.429935	0.379515	0.208527	0.401242	fru
LMD38_RS02335	179.625	0.391955	0.347833	0.21921	0.410387	fru
LMD38_RS02340	832.811	0.374263	0.333027	0.224018	0.415993	fru
LMD38_RS02345	18.4453	-0.2434	0.632562	0.586483	1	fru
LMD38_RS02350	3022.25	0.944022	0.445334	0.0137329	0.0613372	fru
LMD38_RS02355	43.828	-0.14312	0.624584	0.74844	0.841258	fru
LMD38_RS02360	77.4558	-0.571093	0.656429	0.207946	0.400504	fru
LMD38_RS02365	58.8045	-0.341538	0.713409	NA	1	fru
LMD38_RS02370	0.72764	-0.0618154	0.983572	0.73105	1	fru
LMD38_RS02375	0.796847	0.0391301	0.982052	0.828731	1	fru
LMD38_RS02390	194.368	-0.850795	0.646295	0.0634262	0.185126	fru
LMD38_RS02395	47.4015	-0.23942	0.587157	0.587136	0.723433	fru
LMD38_RS02400	49.3298	-1.28218	0.68114	0.00698222	0.0362504	fru
LMD38_RS02405	366.982	-2.37498	0.679848	1.90427e-06	3.82738e-05	fru
LMD38_RS02415	0.630398	-0.0516973	0.981772	0.777468	1	fru
LMD38_RS02420	8.08097	0.349369	0.745878	0.424788	1	fru
LMD38_RS02425	2.40725	-0.168785	0.960678	0.495286	1	fru
LMD38_RS02430	2.76761	-0.262898	0.965722	0.322551	1	fru
LMD38_RS02435	109.158	-0.904817	0.511019	0.0300475	0.110077	fru
LMD38_RS02440	28.7637	-0.888069	0.594126	0.0471123	0.152127	fru
LMD38_RS02445	4.94578	-0.625248	0.942111	0.106842	1	fru
LMD38_RS02450	1.47406	-0.0797824	0.957253	0.736578	1	fru
LMD38_RS02455	2.11042	-0.175621	0.927851	0.552521	1	fru
LMD38_RS02460	4.40029	0.708196	0.971115	0.0718471	1	fru
LMD38_RS02465	28.7802	-0.752761	0.811782	0.0956332	0.244811	fru
LMD38_RS02470	2.26102	-0.226282	0.989138	0.294187	1	fru
LMD38_RS02480	8.57435	0.107136	0.807393	0.788956	1	fru
LMD38_RS02485	10.3025	0.518211	0.848324	0.21028	1	fru
LMD38_RS02490	5.44719	-0.357359	0.841512	0.368188	1	fru
LMD38_RS02495	26.3988	-0.418737	0.737685	0.344336	1	fru
LMD38_RS02500	12973.9	0.566875	0.501431	0.169482	0.353778	fru
LMD38_RS02505	496.087	-1.50397	0.437587	6.06861e-05	0.000737681	fru
LMD38_RS02510	40.2659	-0.402847	0.736646	0.362449	0.55176	fru
LMD38_RS02515	394.176	-0.298093	0.309945	0.303504	0.498675	fru
LMD38_RS02520	251.926	0.536533	0.403647	0.134043	0.305911	fru
LMD38_RS02525	106.653	-0.592536	0.412272	0.103186	0.257559	fru
LMD38_RS02530	225.34	0.161143	0.469367	0.684719	0.794956	fru
LMD38_RS02535	1259.58	0.308443	0.339277	0.323792	0.518201	fru
LMD38_RS28580	8.05467	-0.554381	0.941412	0.135339	1	fru
LMD38_RS02540	52.2791	-0.435691	0.588814	0.324539	0.518344	fru
LMD38_RS02545	7.31267	-0.350715	0.89956	0.324857	1	fru
LMD38_RS02550	294.376	0.333864	0.310295	0.24959	0.445422	fru
LMD38_RS02555	491.538	-0.175756	0.48631	0.664583	0.779153	fru
LMD38_RS02560	56.4793	-0.063306	0.72423	0.884812	0.931864	fru
LMD38_RS02565	120.789	-1.03404	0.425215	0.00528628	0.029388	fru
LMD38_RS02570	392.667	1.2541	0.348041	7.7263e-05	0.000898819	fru
LMD38_RS02575	554.996	1.56746	0.240272	7.87768e-12	6.27125e-10	fru
LMD38_RS02580	236.314	0.94309	0.294561	0.000653946	0.00527838	fru
LMD38_RS02585	832.341	1.73258	0.376331	2.03418e-07	5.45926e-06	fru
LMD38_RS02590	208.856	0.143775	0.378784	0.673689	0.786649	fru
LMD38_RS02595	145.175	0.525764	0.39272	0.133983	0.305911	fru
LMD38_RS02600	103.552	-0.618086	0.519782	0.141723	0.315656	fru
LMD38_RS02605	137.631	-0.00169713	0.51055	0.996747	0.99783	fru
LMD38_RS02610	165.327	0.118414	0.562605	0.785263	0.865738	fru
LMD38_RS02615	67.8127	-0.819387	0.613715	0.0695484	0.19899	fru
LMD38_RS02620	23.6665	-0.340643	0.801632	0.413435	1	fru
LMD38_RS02625	208.568	-0.273372	0.328202	0.368692	0.558332	fru
LMD38_RS02630	510.618	1.49166	0.335039	1.09722e-06	2.34459e-05	fru
LMD38_RS02635	465.644	1.55534	0.373241	3.00948e-06	5.69705e-05	fru
LMD38_RS02640	192.772	0.463437	0.358164	0.155924	0.335836	fru
LMD38_RS02645	336.602	0.236291	0.438677	0.533971	0.689542	fru
LMD38_RS02650	65.7888	0.0639893	0.532054	0.880234	0.929454	fru
LMD38_RS02655	27.1845	-0.274288	0.537162	0.520371	1	fru
LMD38_RS02660	57.457	-1.20703	0.475323	0.00246333	0.0157746	fru
LMD38_RS02665	22.6139	-0.489408	0.770981	0.264414	1	fru
LMD38_RS02670	88.6595	-0.734732	0.510936	0.0780694	0.215295	fru
LMD38_RS02675	63.7642	0.141383	0.655293	0.752023	0.842153	fru
LMD38_RS02680	143.958	-1.03227	0.577932	0.0199207	0.0811242	fru
LMD38_RS02685	39.3226	-0.463408	0.660142	0.304756	0.499617	fru
LMD38_RS02690	232.442	0.329005	0.314124	0.261543	0.458023	fru
LMD38_RS02695	41.0774	-0.196419	0.657604	0.660938	0.776391	fru
LMD38_RS02700	31.6069	-0.227918	0.710123	0.606616	0.736943	fru
LMD38_RS02705	101.453	-0.421976	0.500741	0.305954	0.499667	fru
LMD38_RS02710	79.2548	-0.720416	0.578856	0.102859	0.257325	fru
LMD38_RS02715	169.78	0.798607	0.632905	NA	1	fru
LMD38_RS02720	773.52	1.50005	0.313226	2.18049e-07	5.78613e-06	fru
LMD38_RS02725	38.2927	-0.320018	0.73119	0.46746	0.640159	fru
LMD38_RS02730	80.2455	-0.457078	0.630171	0.309101	0.502182	fru
LMD38_RS02750	11.4098	-0.286016	0.867161	0.441332	1	fru
LMD38_RS02755	88.0727	0.248936	0.586358	0.572243	0.713285	fru
LMD38_RS02760	91.8844	-0.321201	0.655382	0.474553	0.646715	fru
LMD38_RS02765	44.6961	-0.0370107	0.643114	0.934018	0.962465	fru
LMD38_RS02770	244.137	0.869952	0.34267	0.005693	0.0311896	fru
LMD38_RS02775	225.005	0.226064	0.383281	0.511738	0.676761	fru
LMD38_RS02780	85.1101	-0.932624	0.461786	0.0174698	0.0730458	fru
LMD38_RS02785	3634.54	0.537989	0.466079	0.173389	0.358588	fru
LMD38_RS02790	551.023	-0.981738	0.337663	0.00157299	0.0109731	fru
LMD38_RS02795	106.246	-0.817275	0.487381	0.0440952	0.144622	fru
LMD38_RS02800	110.794	-0.444745	0.656221	0.324159	0.518344	fru
LMD38_RS02805	72.0764	-0.284563	0.660384	NA	1	fru
LMD38_RS02810	231.079	-0.641281	0.427759	0.0857554	0.227564	fru
LMD38_RS02815	114.769	-0.634978	0.60154	0.155141	0.335754	fru
LMD38_RS02820	46.5675	-0.12575	0.456382	0.747089	0.840971	fru
LMD38_RS02825	738.033	-0.653361	0.259669	0.00835561	0.0417266	fru
LMD38_RS02830	19.9911	-0.315266	0.780663	0.457185	1	fru
LMD38_RS02835	1329.33	0.910321	0.437243	0.0161543	0.0689659	fru
LMD38_RS02840	2843.78	1.00984	0.473531	0.0112765	0.0528058	fru
LMD38_RS02845	45.4716	-0.716821	0.437781	0.0586775	0.176333	fru
LMD38_RS02850	306.12	0.972427	0.311852	0.000818442	0.00638192	fru
LMD38_RS02855	347.473	0.418239	0.326656	0.167291	0.351083	fru
LMD38_RS02860	64.762	-0.113458	0.452775	0.769942	0.854789	fru
LMD38_RS02865	120.325	-0.370855	0.354844	0.252696	0.448012	fru
LMD38_RS02870	94.8943	-0.510999	0.565306	0.241763	0.438001	fru
LMD38_RS02875	8.96977	0.207478	0.868618	0.565694	1	fru
LMD38_RS02880	19.7766	0.74153	0.93308	0.0752324	1	fru
LMD38_RS02885	861.26	-0.0140595	0.323119	0.962643	0.980738	fru
LMD38_RS02890	845.66	-0.321337	0.31782	0.277603	0.472764	fru
LMD38_RS02895	184.042	1.37209	0.391265	7.63594e-05	0.00089086	fru
LMD38_RS02900	24.9551	0.196451	0.598279	0.657398	1	fru
LMD38_RS02905	428.187	1.56325	0.691583	0.00124599	0.00911482	fru
LMD38_RS02910	60.7874	-0.98947	0.621016	0.0298508	0.109778	fru
LMD38_RS02915	8.93841	0.363774	0.702229	0.415884	1	fru
LMD38_RS02920	9.46554	0.126108	0.803138	0.75462	1	fru
LMD38_RS02925	25.927	-0.417245	0.771882	NA	1	fru
LMD38_RS02930	182.038	-0.5064	0.368104	0.129212	0.298437	fru
LMD38_RS02935	25.4313	-1.22636	0.667835	0.0092107	1	fru
LMD38_RS02940	91.877	-0.0429698	0.727154	0.921496	0.955191	fru
LMD38_RS02945	59.8369	-0.682494	0.476772	0.0885269	0.232696	fru
LMD38_RS02950	30.4536	-0.816708	0.796042	0.0757545	0.211093	fru
LMD38_RS02955	38.1864	-0.418268	0.714319	0.349513	0.540374	fru
LMD38_RS02960	76.5481	-0.246568	0.67557	0.581693	0.719365	fru
LMD38_RS02965	133.425	-0.971062	0.624156	NA	1	fru
LMD38_RS02970	55.2242	0.936332	0.720135	0.0460269	0.149018	fru
LMD38_RS02975	29.8911	-0.534258	0.562623	0.22026	0.411051	fru
LMD38_RS02980	2.01657	0.380129	0.970112	0.202304	1	fru
LMD38_RS02985	124.123	-0.734935	0.417651	0.0451325	0.147297	fru
LMD38_RS02990	348.342	-0.194557	0.23529	0.39043	0.574739	fru
LMD38_RS02995	90.0196	-0.395485	0.716464	0.375196	0.563181	fru
LMD38_RS03000	151.339	-1.39898	0.483639	0.000498701	0.00418332	fru
LMD38_RS03005	135.917	-0.944214	0.477802	0.0185169	0.0766332	fru
LMD38_RS03010	56.0847	-0.710815	0.569844	0.105362	0.260682	fru
LMD38_RS28685	4.15091	-0.734498	0.946751	0.0732814	1	fru
LMD38_RS03025	7.85309	-0.349181	0.739338	0.426872	1	fru
LMD38_RS03030	67.138	-0.383094	0.604957	0.389416	0.574085	fru
LMD38_RS03035	15.5053	-0.265226	0.768137	0.534072	1	fru
LMD38_RS03040	30.4149	-0.676699	0.748801	0.136858	0.309206	fru
LMD38_RS03045	61.8196	-0.295961	0.524052	0.48296	0.652631	fru
LMD38_RS03050	23.1537	-0.12328	0.768342	0.770002	1	fru
LMD38_RS03055	49.9046	-0.664078	0.661294	0.145273	0.322124	fru
LMD38_RS03060	23.1868	0.197267	0.585531	0.654239	1	fru
LMD38_RS03065	4046.32	-1.174	0.529855	0.00575694	0.0312934	fru
LMD38_RS03070	3756.62	0.886475	0.470534	0.0256387	0.0983867	fru
LMD38_RS03075	60.0463	-0.985126	0.478252	0.014036	0.0622442	fru
LMD38_RS03080	21.9703	-1.36326	0.61036	0.00281812	1	fru
LMD38_RS03085	15.1891	-0.880363	0.752033	0.0595203	1	fru
LMD38_RS03090	82.3823	-0.57999	0.532811	0.17311	0.358401	fru
LMD38_RS03095	99.9488	0.511713	0.593465	0.248909	0.445355	fru
LMD38_RS03100	81.4749	-0.571994	0.737968	0.203988	0.396643	fru
LMD38_RS03105	42.9263	-0.428082	0.690037	0.341527	0.532511	fru
LMD38_RS03110	43.8086	-0.134588	0.530988	0.751113	0.842153	fru
LMD38_RS03115	121.371	-0.547251	0.448643	0.155825	0.335836	fru
LMD38_RS03120	252.052	0.243415	0.33512	0.43151	0.61005	fru
LMD38_RS03125	23.1786	0.0780848	0.706534	0.859586	1	fru
LMD38_RS03130	136.954	0.262095	0.492973	0.52116	0.682906	fru
LMD38_RS03140	90.9881	-0.678107	0.524618	0.10868	0.266127	fru
LMD38_RS03145	8.35152	-0.712568	0.94223	0.0801429	1	fru
LMD38_RS03150	40.7058	-0.347433	0.582621	0.43012	0.61005	fru
LMD38_RS03155	173.487	1.69349	0.614132	0.00023023	0.00226327	fru
LMD38_RS03160	135.365	-0.136333	0.490529	0.737859	0.8341	fru
LMD38_RS03165	23.4951	-0.0563567	0.812884	0.886686	1	fru
LMD38_RS03170	10.4093	-0.628172	0.851001	0.141545	1	fru
LMD38_RS03175	94.0203	-0.660232	0.719076	0.148077	0.325786	fru
LMD38_RS03180	302.86	0.671186	0.25487	0.00586003	0.0315959	fru
LMD38_RS03185	1644.26	1.78466	0.310221	3.76336e-10	2.18275e-08	fru
LMD38_RS03190	72.753	-0.474708	0.548121	0.270681	0.466652	fru
LMD38_RS03195	23.3986	-0.434858	0.694892	0.333729	1	fru
LMD38_RS03200	96.6119	-0.598537	0.445566	0.118881	0.283467	fru
LMD38_RS03205	150.054	-0.458095	0.620734	0.306773	0.5	fru
LMD38_RS03210	9902.33	-0.0931018	0.483669	0.817766	0.887498	fru
LMD38_RS03215	12.7115	1.71515	1.27853	0.00166784	1	fru
LMD38_RS03220	51.6721	-0.452969	0.756184	0.303429	0.498675	fru
LMD38_RS03225	77.4457	0.0766049	0.364817	0.817273	0.887498	fru
LMD38_RS03230	8.89198	-0.230539	0.809171	0.569148	1	fru
LMD38_RS03235	65.4838	-0.728225	0.658087	0.111209	0.270041	fru
LMD38_RS03240	89.0549	-0.812379	0.667487	0.0776271	0.214399	fru
LMD38_RS03245	211.918	-0.856665	0.587684	0.0543422	0.167591	fru
LMD38_RS03250	128.596	-0.3108	0.669857	NA	1	fru
LMD38_RS03255	8.48337	-0.704048	1.00449	NA	1	fru
LMD38_RS03260	78.6256	-1.02795	0.388489	0.00305104	0.018883	fru
LMD38_RS03265	17.4221	-0.0955194	0.792945	0.815136	1	fru
LMD38_RS03270	37.2571	-0.769648	0.695971	0.0951314	0.243858	fru
LMD38_RS03275	51.8222	-0.257442	0.643859	0.565711	0.71134	fru
LMD38_RS03280	138.472	-0.128208	0.453299	0.741233	0.836178	fru
LMD38_RS03285	119.416	-0.191222	0.449726	0.620553	0.746061	fru
LMD38_RS03290	114.442	0.38466	0.389703	0.270224	0.466487	fru
LMD38_RS03295	243.923	0.589227	0.380968	0.0856006	0.227564	fru
LMD38_RS03300	42.0212	0.110952	0.708791	0.801442	0.875869	fru
LMD38_RS03305	11.6037	-0.442703	0.750394	0.315485	1	fru
LMD38_RS03310	83.8603	-0.65309	0.372749	0.0525842	0.164467	fru
LMD38_RS03315	20.8418	0.579862	0.705921	0.201393	1	fru
LMD38_RS03320	7.76719	0.246004	0.849959	0.517106	1	fru
LMD38_RS03325	72.6151	-0.443893	0.658149	0.325132	0.518678	fru
LMD38_RS03330	77.0623	-0.506987	0.608928	0.25656	0.452491	fru
LMD38_RS03335	2342.07	-1.5324	0.55278	0.000418135	0.00365868	fru
LMD38_RS03340	28.3314	0.308733	0.714272	0.486566	0.655542	fru
LMD38_RS03345	43.6124	-0.504609	0.624061	0.261308	0.458004	fru
LMD38_RS03350	36.448	0.514597	0.675343	0.255783	0.451644	fru
LMD38_RS03355	213.845	-1.25246	0.436121	0.000871096	0.00672367	fru
LMD38_RS03360	942.598	-0.577436	0.464683	0.143191	0.318377	fru
LMD38_RS03365	243.871	0.580905	0.544023	0.176591	0.361811	fru
LMD38_RS03370	195.239	0.707008	0.534665	0.0975822	0.24808	fru
LMD38_RS03375	234.11	-0.375979	0.346744	0.237387	0.431631	fru
LMD38_RS03380	166.783	-0.341605	0.318455	0.249209	0.445355	fru
LMD38_RS03385	1747.41	0.933691	0.496292	0.0228287	0.0905122	fru
LMD38_RS03390	1878.53	-0.326964	0.426556	0.380282	0.567724	fru
LMD38_RS03395	56.0584	-0.30069	0.620802	0.500949	0.667932	fru
LMD38_RS03400	342.311	0.524377	0.396706	0.137984	0.310345	fru
LMD38_RS03405	258.569	-0.500829	0.33178	0.102572	0.25698	fru
LMD38_RS03410	62.8049	-0.34788	0.391104	0.320038	0.5148	fru
LMD38_RS03415	211.435	-0.586253	0.332653	0.056501	0.171702	fru
LMD38_RS03420	130.608	-0.210295	0.419378	0.56796	0.711664	fru
LMD38_RS03425	71.79	-0.128365	0.387264	0.711663	0.814132	fru
LMD38_RS03430	433.982	1.25845	0.266178	6.14482e-07	1.43379e-05	fru
LMD38_RS03435	96.3435	0.413467	0.435262	0.273873	0.469088	fru
LMD38_RS03440	472.377	0.106912	0.480386	0.790505	0.869896	fru
LMD38_RS03445	314.341	0.638935	0.326881	0.0349054	0.122569	fru
LMD38_RS03450	314.682	0.512576	0.310595	0.0772917	0.213909	fru
LMD38_RS03455	90.0451	-0.656367	0.413807	0.0717592	0.203257	fru
LMD38_RS03460	1.45035	-0.112873	0.961285	0.630888	1	fru
LMD38_RS03465	2421.74	0.88683	0.304727	0.00186384	0.0125078	fru
LMD38_RS03470	2413.87	0.504281	0.495307	0.218438	0.410202	fru
LMD38_RS03475	1027.7	0.509306	0.425449	0.17087	0.355315	fru
LMD38_RS03480	144.711	-0.583106	0.459549	0.136523	0.309138	fru
LMD38_RS03485	67.4397	0.52498	0.485781	0.195131	0.386832	fru
LMD38_RS03490	123.304	0.582915	0.421892	0.11483	0.276313	fru
LMD38_RS03495	6.35879	-0.0325493	0.845926	0.929973	1	fru
LMD38_RS03500	326.442	0.775787	0.437042	0.040465	0.135775	fru
LMD38_RS03505	493.667	0.209498	0.36168	0.524604	0.685294	fru
LMD38_RS03510	313.452	0.327238	0.353293	0.311146	0.504695	fru
LMD38_RS03515	74.6685	0.609354	0.463529	0.121765	0.28751	fru
LMD38_RS03520	256.182	-0.00212594	0.309757	0.994143	0.99709	fru
LMD38_RS03525	752.929	0.820092	0.366038	0.0134776	0.0603962	fru
LMD38_RS03530	4795.15	0.949062	0.534166	0.0262448	0.0999566	fru
LMD38_RS03535	142.824	0.349816	0.569581	0.423499	0.60408	fru
LMD38_RS03540	13.6016	-0.275629	0.885306	0.438208	1	fru
LMD38_RS03545	173.676	-0.938782	0.394477	0.00753711	0.0384914	fru
LMD38_RS03550	83.4212	0.129423	0.426344	0.728296	0.826637	fru
LMD38_RS03555	64.5129	0.0417294	0.699319	0.924892	0.957293	fru
LMD38_RS03560	38.3814	-0.874283	0.498053	0.0334398	0.118514	fru
LMD38_RS03565	13.7846	-0.178435	0.797043	0.662658	1	fru
LMD38_RS03570	1.79743	-0.080778	0.949765	0.746765	1	fru
LMD38_RS03575	70.8078	-0.555978	0.529718	0.190298	0.380408	fru
LMD38_RS03580	54.7916	-0.147119	0.635984	0.742122	0.836484	fru
LMD38_RS03585	87.3916	-0.632416	0.487502	0.119383	0.284444	fru
LMD38_RS03590	427.714	-1.05244	0.295048	0.000144097	0.00152352	fru
LMD38_RS03600	500.914	0.484532	0.272639	0.0612636	0.18129	fru
LMD38_RS03605	6.8445	0.165597	0.820323	0.674549	1	fru
LMD38_RS03610	213.947	2.06736	0.578547	3.6795e-06	6.66909e-05	fru
LMD38_RS03630	2195.5	1.982	0.574079	8.02853e-06	0.000129864	fru
LMD38_RS03635	104.167	-0.597002	0.451591	0.12314	0.289648	fru
LMD38_RS03640	98.9038	0.322343	0.403161	0.367736	0.557093	fru
LMD38_RS03645	191.584	0.860868	0.346342	0.00668356	0.0351383	fru
LMD38_RS03650	47.2828	-0.871394	0.627793	0.0556297	0.169689	fru
LMD38_RS03655	85.4756	-0.525222	0.686827	0.246195	0.443054	fru
LMD38_RS03660	607.603	-0.521352	0.347285	0.101692	0.255805	fru
LMD38_RS03665	344.736	0.16233	0.240283	0.482145	0.652631	fru
LMD38_RS03670	1537	-0.0790012	0.397728	0.823567	0.891875	fru
LMD38_RS03675	101.921	-0.478241	0.577273	0.276742	0.471693	fru
LMD38_RS03680	164.949	-1.40087	0.562086	0.00139877	0.00995495	fru
LMD38_RS03685	941.995	-1.17911	0.551278	0.00660379	0.03482	fru
LMD38_RS03690	490.95	-0.489817	0.333167	0.111598	0.270542	fru
LMD38_RS03695	397.659	0.0735994	0.366886	0.825094	0.891875	fru
LMD38_RS03700	71.3156	-1.22266	0.688652	0.0101119	0.0487584	fru
LMD38_RS03705	56.4022	-0.410921	0.699765	0.359797	0.549577	fru
LMD38_RS03710	242.225	0.773165	0.49966	0.0604977	0.179942	fru
LMD38_RS03715	127.243	0.331209	0.450877	0.391965	0.576586	fru
LMD38_RS03720	983.25	0.349299	0.422685	0.345509	0.536636	fru
LMD38_RS03725	26.9094	-0.918469	0.578084	0.0380557	1	fru
LMD38_RS03730	69.4943	-0.320538	0.67546	0.475001	0.646715	fru
LMD38_RS03735	168.078	0.161237	0.376279	0.635024	0.756513	fru
LMD38_RS03740	420.12	-0.314488	0.361927	0.339739	0.530728	fru
LMD38_RS03745	10.3202	-0.0424034	0.835101	0.910978	1	fru
LMD38_RS03750	29.7414	0.0190971	0.672759	0.965856	0.982154	fru
LMD38_RS03755	5724.66	2.39017	0.552837	4.9643e-08	1.5269e-06	fru
LMD38_RS03760	10892.4	2.09844	0.593249	3.76686e-06	6.76702e-05	fru
LMD38_RS03765	13.374	-0.370708	0.875185	0.32621	1	fru
LMD38_RS03770	58.1367	-0.742458	0.697141	0.106663	0.262544	fru
LMD38_RS03780	849.521	-0.1658	0.476635	0.678953	0.790766	fru
LMD38_RS03785	249.802	0.433795	0.330101	0.155656	0.335792	fru
LMD38_RS03790	13610.8	3.01959	0.761309	1.09075e-07	3.0541e-06	fru
LMD38_RS03805	28.2255	-0.0065994	0.77134	0.987429	0.994579	fru
LMD38_RS03810	14.6476	-0.482977	0.802494	0.259224	1	fru
LMD38_RS03815	78.83	-0.447122	0.595758	0.313727	0.508475	fru
LMD38_RS03820	23.1324	0.188191	0.74477	0.663478	1	fru
LMD38_RS03825	56.8104	-0.262261	0.716781	0.55297	0.702239	fru
LMD38_RS03830	8.76444	-0.289145	0.870692	0.433521	1	fru
LMD38_RS03835	4.36564	-0.0868	0.889313	0.793141	1	fru
LMD38_RS03840	65.671	-0.842203	0.726973	0.0701632	0.199763	fru
LMD38_RS03845	40.4373	-0.396731	0.712624	0.374388	0.562344	fru
LMD38_RS03850	908.079	1.52865	0.382782	6.84599e-06	0.000112987	fru
LMD38_RS03855	221.587	0.706193	0.372336	0.0358902	0.124862	fru
LMD38_RS03860	9.33169	-0.379023	0.873615	0.318446	1	fru
LMD38_RS03865	201.02	-0.610926	0.347675	0.0552895	0.16916	fru
LMD38_RS03870	44.6048	0.769582	0.685656	0.0947886	0.243504	fru
LMD38_RS03875	122.416	-0.014075	0.45305	0.97107	0.985144	fru
LMD38_RS03880	227.665	-0.195011	0.430601	0.603167	0.73429	fru
LMD38_RS03885	28.7177	-0.43609	0.669721	0.333659	0.524984	fru
LMD38_RS03890	470.483	0.611695	0.385924	0.0772052	0.213815	fru
LMD38_RS03895	29.4791	-0.849247	0.71504	0.0678751	0.195303	fru
LMD38_RS03900	29.3192	-0.0635421	0.733984	0.883613	0.931106	fru
LMD38_RS03905	527.541	-0.378039	0.218334	0.0736442	0.206346	fru
LMD38_RS03910	1557.18	0.881034	0.411959	0.0152006	0.0658637	fru
LMD38_RS03915	637.037	0.868363	0.377968	0.0107023	0.0508885	fru
LMD38_RS03920	1275.22	0.9042	0.437193	0.0168797	0.0710909	fru
LMD38_RS03925	2722.57	0.875949	0.489667	0.0313932	0.113395	fru
LMD38_RS03930	2898.95	1.3185	0.380806	0.000106273	0.00117888	fru
LMD38_RS03935	31079.2	-0.00423066	0.524145	0.991996	0.99666	fru
LMD38_RS03940	238.102	-0.355462	0.299452	0.206221	0.398694	fru
LMD38_RS03945	77.4561	-0.00343121	0.636426	0.993873	0.997065	fru
LMD38_RS03950	46.7869	-0.930114	0.695158	0.0464085	0.150134	fru
LMD38_RS03955	1063.54	-0.644159	0.36482	0.0518487	0.162804	fru
LMD38_RS03960	3034.02	0.727308	0.478287	0.0700385	0.199548	fru
LMD38_RS03965	2605.86	0.716014	0.473241	0.0726349	0.204223	fru
LMD38_RS03970	43.9318	-0.2452	0.541252	0.566814	0.711664	fru
LMD38_RS03975	5.98288	-0.25642	0.903965	0.444918	1	fru
LMD38_RS03980	150.622	0.210629	0.333907	0.494798	0.662996	fru
LMD38_RS03985	302.316	-0.0931343	0.317143	0.752603	0.842153	fru
LMD38_RS03990	3006.05	0.610713	0.387947	0.0788708	0.216654	fru
LMD38_RS03995	1177.06	1.00756	0.415668	0.00575767	0.0312934	fru
LMD38_RS04000	319.863	1.79059	0.444577	1.96709e-06	3.9149e-05	fru
LMD38_RS04005	159.19	-0.308608	0.302203	0.276284	0.471156	fru
LMD38_RS04010	4671.86	-0.852495	0.486878	0.0356049	0.124131	fru
LMD38_RS04015	454.843	0.315584	0.353734	0.329185	0.522121	fru
LMD38_RS04020	177.171	0.0817216	0.315585	0.78121	0.863604	fru
LMD38_RS04025	500.288	-0.163545	0.286255	0.545277	0.697542	fru
LMD38_RS04030	321.659	0.41403	0.328228	0.173334	0.358588	fru
LMD38_RS04035	72.2315	-0.737711	0.742206	0.108074	0.264963	fru
LMD38_RS04040	4722.14	0.981887	0.442996	0.0100834	0.0486785	fru
LMD38_RS04045	869.215	0.345066	0.407163	0.33843	0.529694	fru
LMD38_RS04050	89.278	0.279078	0.52325	0.507937	0.673709	fru
LMD38_RS04055	271.007	0.646078	0.329429	0.0340678	0.120274	fru
LMD38_RS04060	329.582	-0.27282	0.314735	0.352664	0.544003	fru
LMD38_RS04065	1461.74	1.31003	0.335386	2.04622e-05	0.000289465	fru
LMD38_RS04070	50.5543	-0.870864	0.472487	0.0287788	0.107096	fru
LMD38_RS04075	150.582	0.367891	0.324929	0.222442	0.414082	fru
LMD38_RS04080	572.392	1.06841	0.289819	8.86335e-05	0.00100237	fru
LMD38_RS04085	42.236	-0.815391	0.674867	0.0770826	0.213731	fru
LMD38_RS04090	92.3274	-0.384557	0.592485	0.385068	0.570221	fru
LMD38_RS04095	41.7643	0.125174	0.720415	0.775348	0.859381	fru
LMD38_RS04100	140.524	0.622978	0.413876	0.0875132	0.231167	fru
LMD38_RS04105	7.41317	-0.193233	0.8419	0.612109	1	fru
LMD38_RS04110	385.846	0.0737629	0.302132	0.794676	0.872414	fru
LMD38_RS04115	952.019	1.06972	0.321443	0.000329152	0.0029763	fru
LMD38_RS04120	5986.2	0.305885	0.477326	0.445542	0.621615	fru
LMD38_RS04125	2067.39	0.7211	0.42814	0.053434	0.165673	fru
LMD38_RS04130	56.178	-0.398675	0.513226	0.339745	0.530728	fru
LMD38_RS04135	22.4903	-0.872597	0.672526	0.0592784	1	fru
LMD38_RS04140	10.9185	-0.929935	0.958256	0.0368476	1	fru
LMD38_RS04145	76.1453	-0.0217664	0.613997	0.960981	0.979817	fru
LMD38_RS04150	61.1876	-0.804656	0.540815	0.0609172	0.180397	fru
LMD38_RS04155	58.6222	-0.204905	0.510379	0.622516	0.747535	fru
LMD38_RS04160	495.672	0.592909	0.269892	0.0208078	0.0838925	fru
LMD38_RS04165	2352.26	1.4194	0.418407	9.67026e-05	0.00108457	fru
LMD38_RS04170	59.3995	-0.529293	0.666508	0.242712	0.438981	fru
LMD38_RS04175	106.601	-0.281374	0.59651	0.525306	0.685477	fru
LMD38_RS04180	31.8669	-0.664544	0.671864	0.145621	0.322368	fru
LMD38_RS04185	56.3456	0.207196	0.63603	0.643322	0.762595	fru
LMD38_RS04190	20.9631	-0.475873	0.704935	0.290511	1	fru
LMD38_RS04195	68.29	-0.452071	0.5222	0.283321	0.479594	fru
LMD38_RS04200	88.4073	-0.774216	0.468319	0.0507034	0.160324	fru
LMD38_RS04205	88.8318	-1.15215	0.471177	0.00368127	0.0219879	fru
LMD38_RS04210	74.5757	-0.790447	0.516306	0.0594524	0.177613	fru
LMD38_RS04215	245.77	-0.152386	0.290792	0.578312	0.716498	fru
LMD38_RS04220	17.6815	0.0715345	0.765168	0.865449	1	fru
LMD38_RS04225	33.6161	-0.0343113	0.725025	NA	1	fru
LMD38_RS04230	106.736	-0.258571	0.485747	0.523286	0.684674	fru
LMD38_RS04235	168.29	-0.847385	0.327286	0.00515391	0.0289018	fru
LMD38_RS04240	82.0078	-0.528449	0.650034	0.242622	0.438981	fru
LMD38_RS04245	31.1681	-0.320861	0.670038	0.474812	0.646715	fru
LMD38_RS04250	57.9273	-0.249861	0.596286	0.57256	0.713285	fru
LMD38_RS04255	178.318	-0.546387	0.341945	0.0823382	0.223309	fru
LMD38_RS04260	41.9125	0.203761	0.684379	0.64792	0.765911	fru
LMD38_RS04265	123.292	-0.730957	0.434774	0.0527316	0.164635	fru
LMD38_RS04275	26.3324	-0.0067322	0.747107	0.987486	1	fru
LMD38_RS04280	307.623	-1.23982	0.32253	3.19066e-05	0.000426122	fru
LMD38_RS04285	883.405	-0.193792	0.471416	0.626264	0.749921	fru
LMD38_RS04290	757.242	-0.132209	0.316345	0.65385	0.769905	fru
LMD38_RS04295	1473.48	0.231098	0.441042	0.544456	0.697073	fru
LMD38_RS04300	1414.5	0.447323	0.360927	0.173465	0.358588	fru
LMD38_RS04305	960.19	1.20205	0.483577	0.00285695	0.0179	fru
LMD38_RS04310	488.232	0.209607	0.271345	0.416281	0.598902	fru
LMD38_RS04315	57.839	0.163235	0.435701	0.666	0.780364	fru
LMD38_RS04320	792.836	0.238244	0.337962	0.444549	0.621076	fru
LMD38_RS04325	10687.4	1.14856	0.483577	0.00439586	0.0253872	fru
LMD38_RS04330	3397.66	1.08378	0.451382	0.00499684	0.0282338	fru
LMD38_RS04335	151.329	-0.200265	0.467518	0.612978	0.741198	fru
LMD38_RS04340	209.293	0.355988	0.316265	0.227099	0.419171	fru
LMD38_RS04345	147.689	-1.23986	0.49601	0.00244165	0.0156605	fru
LMD38_RS04350	280.159	0.485332	0.379276	0.155464	0.335783	fru
LMD38_RS04355	643.425	1.1111	0.385047	0.00125002	0.00912785	fru
LMD38_RS04360	421.095	0.542057	0.322049	0.0700313	0.199548	fru
LMD38_RS04365	949.778	0.943202	0.352636	0.00338648	0.0206133	fru
LMD38_RS04370	427.346	-0.0677486	0.432966	0.857216	0.912131	fru
LMD38_RS04375	77.1657	-0.0656862	0.52022	0.875777	0.926193	fru
LMD38_RS04380	71.0052	-0.498337	0.685012	0.270471	0.466487	fru
LMD38_RS04385	80.0743	0.395995	0.433596	0.293401	0.488553	fru
LMD38_RS04390	11.8155	-0.305115	0.821923	0.449207	1	fru
LMD38_RS04395	131.103	-0.170822	0.502949	0.679163	0.790766	fru
LMD38_RS04400	42.7437	-0.291948	0.74802	0.501886	0.668304	fru
LMD38_RS04405	131.611	-0.303397	0.625137	0.497579	0.664967	fru
LMD38_RS04545	0.84142	-0.0694613	0.983028	0.70329	1	fru
LMD38_RS04555	66.4101	-0.23649	0.734253	0.588429	0.724165	fru
LMD38_RS04560	43.5414	-0.51909	0.480632	0.197362	0.389354	fru
LMD38_RS04565	45.4487	-0.330254	0.57535	0.451372	0.62652	fru
LMD38_RS04570	158.089	-0.377814	0.648489	0.400886	0.584018	fru
LMD38_RS04575	280.516	0.338087	0.227507	0.123643	0.29	fru
LMD38_RS04580	115.231	-0.848951	0.669928	0.0659277	0.19119	fru
LMD38_RS04585	404.179	0.211677	0.286163	0.433567	0.611847	fru
LMD38_RS04590	417.091	0.859298	0.377472	0.0114699	0.0535879	fru
LMD38_RS04595	293.824	0.866505	0.384815	0.012011	0.0554145	fru
LMD38_RS04600	112.028	-1.08596	0.447836	0.00468583	0.0269851	fru
LMD38_RS04615	0.976033	0.0852858	0.96971	0.690747	1	fru
LMD38_RS04620	31.5147	-0.648553	0.600996	0.146517	0.323645	fru
LMD38_RS04625	126.731	0.292928	0.360837	0.372737	0.561246	fru
LMD38_RS04630	39.7206	-0.342356	0.730239	NA	1	fru
LMD38_RS04635	57.6306	-0.252454	0.496078	0.538024	0.692355	fru
LMD38_RS04640	303.234	-0.408917	0.385628	0.237397	0.431631	fru
LMD38_RS04645	3981.68	1.07704	0.444814	0.00484436	0.0277016	fru
LMD38_RS04650	4728.18	0.611875	0.468944	0.122946	0.289536	fru
LMD38_RS04655	128.124	-0.223298	0.663508	0.618115	0.744399	fru
LMD38_RS04660	1558.36	1.1636	0.279843	1.05243e-05	0.000163711	fru
LMD38_RS04665	751.645	1.72097	0.456615	7.45546e-06	0.000122053	fru
LMD38_RS04670	35.8202	0.00390328	0.656833	0.993033	0.996715	fru
LMD38_RS04675	74.359	0.314512	0.670861	0.483465	0.652631	fru
LMD38_RS04680	630.844	-0.0634561	0.304493	0.824018	0.891875	fru
LMD38_RS04685	153.511	0.436865	0.437163	0.249033	0.445355	fru
LMD38_RS04690	298.285	0.760961	0.272828	0.00328828	0.0200758	fru
LMD38_RS04695	127.979	0.155104	0.340467	0.620818	0.746158	fru
LMD38_RS04700	804.504	1.41376	0.331394	3.28474e-06	6.06183e-05	fru
LMD38_RS04705	1214.69	0.892824	0.401008	0.0120933	0.0557309	fru
LMD38_RS04710	130.1	-0.472197	0.585409	0.285035	0.481182	fru
LMD38_RS04715	108.618	-0.52615	0.534891	0.217236	0.408892	fru
LMD38_RS04720	11441.5	0.0944555	0.492371	0.817005	0.887498	fru
LMD38_RS04725	203.56	-0.135737	0.346284	0.669416	0.783116	fru
LMD38_RS04730	113.686	-0.414264	0.634174	0.356486	0.54637	fru
LMD38_RS04735	137.186	-0.366944	0.334704	0.235166	0.428533	fru
LMD38_RS04740	72.8369	-0.244227	0.651479	0.585874	0.722774	fru
LMD38_RS04745	966.301	1.11237	0.343477	0.000405477	0.00357878	fru
LMD38_RS04750	2148.48	1.50209	0.393449	1.51824e-05	0.000222528	fru
LMD38_RS04755	177.962	0.978559	0.379249	0.00408872	0.023799	fru
LMD38_RS04760	1567.48	0.612638	0.389909	0.0790738	0.217065	fru
LMD38_RS04765	567.749	0.629904	0.298958	0.0248185	0.0963319	fru
LMD38_RS04770	23.6278	0.201256	0.687946	0.651635	1	fru
LMD38_RS04775	107.051	-0.563045	0.536737	0.187492	0.37698	fru
LMD38_RS04780	216.753	-0.00623956	0.326276	0.983551	0.992844	fru
LMD38_RS04785	1760.72	1.19506	0.407251	0.000860633	0.00665556	fru
LMD38_RS04790	10377.5	0.809719	0.477884	0.0435572	0.143541	fru
LMD38_RS04795	1454.81	0.393157	0.458783	0.314976	0.509717	fru
LMD38_RS04800	190.829	0.316051	0.302165	0.264811	0.461298	fru
LMD38_RS04805	661.021	0.919632	0.318022	0.00186205	0.0125078	fru
LMD38_RS04810	145.238	0.0708815	0.411494	0.845308	0.904335	fru
LMD38_RS04815	151.558	0.0365056	0.423269	0.921548	0.955191	fru
LMD38_RS04820	53.3696	-0.69958	0.495307	0.0878248	0.231839	fru
LMD38_RS04825	137.886	-0.284164	0.584025	0.518777	0.681409	fru
LMD38_RS04830	111.345	-0.533868	0.759124	NA	1	fru
LMD38_RS04835	153.801	0.591502	0.451544	0.126608	0.294132	fru
LMD38_RS04845	40.0638	0.0276289	0.660698	0.950702	0.974709	fru
LMD38_RS04850	101.135	-0.754334	0.376124	0.0261441	0.0998543	fru
LMD38_RS04855	126.503	-0.660298	0.475962	0.099045	0.250856	fru
LMD38_RS04860	84.2936	-0.184069	0.750156	NA	1	fru
LMD38_RS04865	77.7493	-0.649909	0.695676	0.154798	0.33519	fru
LMD38_RS04870	77.5333	-0.202306	0.631332	0.65093	0.768026	fru
LMD38_RS04875	195.557	-0.311151	0.601245	0.483429	0.652631	fru
LMD38_RS04880	27.0172	0.437432	0.797057	0.304664	1	fru
LMD38_RS04885	45.5218	-0.538016	0.581338	0.222571	0.414132	fru
LMD38_RS04890	64.6207	-0.031632	0.589334	0.942812	0.969804	fru
LMD38_RS04895	72.9775	0.574598	0.544222	0.181387	0.3684	fru
LMD38_RS04900	339.923	0.874706	0.245564	0.000201671	0.00201987	fru
LMD38_RS04905	66.0126	0.216683	0.472994	0.58685	0.723433	fru
LMD38_RS04910	805.386	1.38413	0.283118	1.95612e-07	5.29456e-06	fru
LMD38_RS04915	402.029	0.781169	0.357213	0.0164271	0.069473	fru
LMD38_RS04920	46.0546	0.0497517	0.43742	0.895612	0.938172	fru
LMD38_RS04925	40.8475	-0.897098	0.519932	0.0331004	0.11778	fru
LMD38_RS04930	37.5217	0.745575	0.765108	0.1033	0.257612	fru
LMD38_RS04935	121.719	-0.567349	0.645351	0.209996	0.401972	fru
LMD38_RS04940	202.206	0.0611552	0.386281	0.859953	0.91446	fru
LMD38_RS04945	1118.27	0.460311	0.250824	0.0552701	0.16916	fru
LMD38_RS04950	168.64	-0.547718	0.49355	0.180468	0.366717	fru
LMD38_RS04955	1118.6	0.78663	0.346408	0.0132538	0.0599362	fru
LMD38_RS04960	693.713	-0.24016	0.439646	0.52791	0.687141	fru
LMD38_RS04965	1306.64	0.44083	0.278553	0.0948226	0.243504	fru
LMD38_RS04970	597.887	0.728967	0.366237	0.0282092	0.105557	fru
LMD38_RS04975	119.264	-0.171686	0.362524	0.60275	0.734108	fru
LMD38_RS04980	10.8625	0.0964194	0.777462	0.817043	1	fru
LMD38_RS04985	18.0397	-0.345924	0.799666	0.407699	1	fru
LMD38_RS04990	1325.74	1.40125	0.373678	2.82489e-05	0.000382301	fru
LMD38_RS04995	3478.82	0.485481	0.450292	0.209137	0.401464	fru
LMD38_RS05000	288.236	0.257866	0.296767	0.355435	0.546202	fru
LMD38_RS05005	113.816	1.54792	0.495875	0.000143333	0.0015194	fru
LMD38_RS05010	173.614	1.06949	0.285273	6.93766e-05	0.000821192	fru
LMD38_RS05015	334.18	1.60941	0.36981	1.08925e-06	2.33988e-05	fru
LMD38_RS05020	491.372	1.86771	0.374643	1.67054e-08	5.69949e-07	fru
LMD38_RS05025	2035.71	1.16332	0.415188	0.00138812	0.00990469	fru
LMD38_RS05030	262.435	-0.388433	0.305323	0.17436	0.359384	fru
LMD38_RS05035	1120.25	1.2235	0.281753	4.05754e-06	7.16244e-05	fru
LMD38_RS05040	143.646	1.4049	0.474304	0.000399455	0.0035333	fru
LMD38_RS05045	18.7633	3.55976	1.56712	8.09612e-06	1	fru
LMD38_RS05050	9.29731	-0.313408	0.883131	0.387906	1	fru
LMD38_RS05055	81.3916	-0.828046	0.58456	0.0622447	0.183126	fru
LMD38_RS05060	66.4474	-0.371954	0.412925	0.307058	0.500062	fru
LMD38_RS05065	9383.94	0.0896829	0.497353	0.827053	0.893136	fru
LMD38_RS05070	383.574	0.60397	0.490261	0.138217	0.310549	fru
LMD38_RS05075	1406.96	0.562979	0.46907	0.155906	0.335836	fru
LMD38_RS05080	586.164	0.587311	0.432568	0.118465	0.282756	fru
LMD38_RS05085	160.285	0.237192	0.357073	0.466732	0.639748	fru
LMD38_RS05090	156.196	-0.513673	0.398438	0.14753	0.325175	fru
LMD38_RS05095	429.736	-0.15239	0.260714	0.54016	0.693783	fru
LMD38_RS05100	1358.44	-0.451226	0.384663	0.191435	0.381956	fru
LMD38_RS05105	377.232	-0.824261	0.365029	0.0128121	0.0583151	fru
LMD38_RS05110	356.751	1.02829	0.424798	0.00551504	0.0304551	fru
LMD38_RS05115	161.079	-0.804833	0.53538	0.059603	0.177932	fru
LMD38_RS05120	921.577	0.255835	0.459694	0.513725	0.678059	fru
LMD38_RS05125	2.65822	0.510091	0.982965	0.121233	1	fru
LMD38_RS05130	369.335	2.24873	0.493682	2.56999e-08	8.55261e-07	fru
LMD38_RS05135	1682.63	2.29183	0.526864	5.91415e-08	1.77863e-06	fru
LMD38_RS05140	3116.89	2.5044	0.520911	3.33178e-09	1.36637e-07	fru
LMD38_RS05145	5164.31	1.17884	0.533562	0.00573903	0.0312934	fru
LMD38_RS05150	12792.5	0.714341	0.529378	0.0925717	0.239389	fru
LMD38_RS05155	25.1591	-0.590436	0.713421	0.19322	1	fru
LMD38_RS05160	209.422	-2.14124	0.394274	4.01859e-10	2.26604e-08	fru
LMD38_RS05165	107.205	-1.34414	0.54084	0.00175478	0.0119537	fru
LMD38_RS05170	61.7492	-1.22705	0.523338	0.00365321	0.0219409	fru
LMD38_RS05175	42.0544	0.15609	0.620773	0.726332	0.8251	fru
LMD38_RS05180	95.8018	-0.446553	0.648988	0.32189	0.516551	fru
LMD38_RS05185	39.6773	0.00404497	0.712419	0.992662	0.996715	fru
LMD38_RS05190	27.1674	-0.309205	0.743831	0.478889	1	fru
LMD38_RS05195	38.9292	-0.0927724	0.581326	0.832747	0.896793	fru
LMD38_RS05200	28.9859	-0.174874	0.681872	0.695079	0.802395	fru
LMD38_RS05205	193.754	0.121606	0.34161	0.69892	0.805226	fru
LMD38_RS05210	23.628	-0.525342	0.80116	0.224377	1	fru
LMD38_RS05215	169.808	-1.40165	0.380911	3.67742e-05	0.000480727	fru
LMD38_RS05220	233.938	-0.839258	0.511114	0.0442146	0.144767	fru
LMD38_RS05225	141.265	-0.801351	0.573848	0.0690197	0.197906	fru
LMD38_RS05230	6.18187	-0.355758	0.932108	0.279852	1	fru
LMD38_RS05235	12.6675	-0.195331	0.787157	0.637835	1	fru
LMD38_RS05240	95.0674	-0.43447	0.56341	0.318622	0.513539	fru
LMD38_RS05245	52.1367	-0.205546	0.661532	0.646228	0.765146	fru
LMD38_RS05250	59.3555	0.15771	0.674974	0.724	0.823373	fru
LMD38_RS05255	271.722	0.455903	0.33114	0.136661	0.309152	fru
LMD38_RS05260	107.406	-0.151239	0.540841	0.723725	0.823373	fru
LMD38_RS05265	163.642	-0.945815	0.517703	0.024338	0.0950118	fru
LMD38_RS05270	57.6676	-0.748436	0.611167	0.0962908	0.245875	fru
LMD38_RS05275	1820.77	1.65822	0.513653	6.54201e-05	0.000785815	fru
LMD38_RS05280	105.968	-1.76925	0.974193	0.001287	0.00936577	fru
LMD38_RS05285	100.338	-0.936084	0.562776	0.0325042	0.116168	fru
LMD38_RS05290	18.8714	0.647533	0.712022	0.155847	1	fru
LMD38_RS05295	120.792	-0.895613	0.577697	0.0429825	0.142413	fru
LMD38_RS05300	206.173	-0.208918	0.268581	0.413545	0.595811	fru
LMD38_RS05305	16.6758	0.0489313	0.747518	0.909242	1	fru
LMD38_RS05310	183.033	-0.0420758	0.281744	0.874611	0.925683	fru
LMD38_RS05315	336.152	1.22249	0.299174	1.2394e-05	0.000189885	fru
LMD38_RS05320	247.366	1.22547	0.33676	7.31564e-05	0.000855951	fru
LMD38_RS05325	154.287	1.6471	0.54409	0.000128089	0.00138677	fru
LMD38_RS05330	193.723	0.54258	0.288217	0.0459961	0.149018	fru
LMD38_RS05335	147.678	0.942337	0.409382	0.00906421	0.0444453	fru
LMD38_RS05340	91.3627	0.420973	0.431036	0.262054	0.458199	fru
LMD38_RS05345	541.291	1.39005	0.323856	3.16483e-06	5.86723e-05	fru
LMD38_RS05350	61.1875	-0.470228	0.691614	0.297238	0.492365	fru
LMD38_RS05355	47.5278	-0.356416	0.771521	0.407101	0.589455	fru
LMD38_RS05360	137.939	0.333814	0.516487	0.425504	0.605943	fru
LMD38_RS05365	279.155	-0.57554	0.551095	0.183079	0.370539	fru
LMD38_RS05370	20.5563	-0.286756	0.767596	0.502605	1	fru
LMD38_RS05375	285.455	-0.528207	0.254093	0.0297098	0.109557	fru
LMD38_RS05380	73.4599	0.750353	0.496339	0.0674465	0.194439	fru
LMD38_RS05385	124.249	-0.450576	0.630354	0.31597	0.510594	fru
LMD38_RS05390	47.4942	-0.391679	0.55976	0.36725	0.556564	fru
LMD38_RS05395	2179.59	-0.476589	0.423909	0.198915	0.390897	fru
LMD38_RS05400	32.3506	0.10983	0.6035	0.804442	0.878203	fru
LMD38_RS05405	217.38	-0.209313	0.266025	0.40865	0.590731	fru
LMD38_RS05410	2487.88	0.0584978	0.37181	0.862007	0.916164	fru
LMD38_RS05415	2246.01	0.23895	0.473737	0.549392	0.700775	fru
LMD38_RS05420	27789.9	0.102234	0.542337	0.811348	0.883129	fru
LMD38_RS05425	3584.13	0.93083	0.462117	0.0177413	0.0739524	fru
LMD38_RS05430	3259.95	1.44585	0.391123	2.95817e-05	0.000396375	fru
LMD38_RS05435	495.074	1.24104	0.412282	0.000597993	0.00489487	fru
LMD38_RS05440	1430.67	1.20159	0.431694	0.00130921	0.00945799	fru
LMD38_RS05445	4544.03	0.835588	0.560135	0.055551	0.1696	fru
LMD38_RS05450	5124.87	2.68381	0.576538	5.41519e-09	2.09388e-07	fru
LMD38_RS05455	50.4116	-0.342861	0.677715	0.445074	0.621389	fru
LMD38_RS05460	140.26	-0.749001	0.579805	0.0902559	0.235752	fru
LMD38_RS05465	276.127	-0.0932773	0.334448	0.762718	0.850023	fru
LMD38_RS05470	514.179	0.20271	0.244599	0.38786	0.572623	fru
LMD38_RS05475	175.578	0.104422	0.356065	0.748119	0.841258	fru
LMD38_RS05480	31.5921	0.189778	0.700149	0.66894	0.782905	fru
LMD38_RS05485	241.481	-0.264908	0.480089	0.510263	0.675471	fru
LMD38_RS05490	342.05	-0.0780113	0.391096	0.823567	0.891875	fru
LMD38_RS05495	120.734	0.147583	0.500801	0.720216	0.820678	fru
LMD38_RS05500	136.33	0.264205	0.328434	0.38525	0.570221	fru
LMD38_RS05505	281.007	0.82466	0.439225	0.0299184	0.109827	fru
LMD38_RS05510	1591.42	0.335701	0.452713	0.386832	0.571937	fru
LMD38_RS05515	2217.38	0.231509	0.403495	0.517973	0.680928	fru
LMD38_RS05520	1102.45	0.492648	0.378304	0.148516	0.326462	fru
LMD38_RS05525	75.4034	-1.34597	0.401297	0.000141657	0.00150952	fru
LMD38_RS05530	140.422	-0.0664408	0.358124	0.838842	0.899629	fru
LMD38_RS05535	285.036	0.493821	0.323072	0.0997803	0.252399	fru
LMD38_RS05540	262.417	0.196863	0.351131	0.540356	0.693816	fru
LMD38_RS05545	118.212	-0.662042	0.61369	0.140761	0.314524	fru
LMD38_RS05550	606.903	0.375877	0.286824	0.165164	0.348683	fru
LMD38_RS05555	323.79	1.51982	0.34679	1.35313e-06	2.80291e-05	fru
LMD38_RS05560	5.53546	-0.366754	0.882377	0.324128	1	fru
LMD38_RS05565	150.387	-0.736484	0.466776	0.0625429	0.183471	fru
LMD38_RS05570	241.183	-0.714433	0.394753	0.0423942	0.140967	fru
LMD38_RS05575	496.331	-0.634857	0.42134	0.0855807	0.227564	fru
LMD38_RS05580	193.51	-0.576203	0.492333	0.158271	0.339092	fru
LMD38_RS05585	2174.91	0.743872	0.400436	0.036519	0.126077	fru
LMD38_RS05590	13.4717	-0.343208	0.88711	0.346584	1	fru
LMD38_RS05595	65.4203	-0.515075	0.45501	0.185667	0.37458	fru
LMD38_RS05600	4.21808	-0.289133	0.870181	0.434025	1	fru
LMD38_RS05605	3510.76	0.868274	0.446356	0.0237098	0.0931865	fru
LMD38_RS05610	158.939	-0.34593	0.629825	0.440143	0.617478	fru
LMD38_RS05615	2677.42	0.32533	0.421577	0.378741	0.566403	fru
LMD38_RS05620	419.949	-0.485997	0.276937	0.0641269	0.186635	fru
LMD38_RS05625	55.6244	-0.690039	0.502537	0.0949157	0.243589	fru
LMD38_RS05630	201.845	-0.145769	0.418304	0.691697	0.799171	fru
LMD38_RS05635	370.294	-0.953642	0.281471	0.000335124	0.00302357	fru
LMD38_RS05640	76.8001	-0.294394	0.588553	0.50484	0.671161	fru
LMD38_RS05645	202.715	-0.558231	0.605529	0.211443	0.403033	fru
LMD38_RS05650	650.129	-0.011595	0.568358	0.978788	0.989019	fru
LMD38_RS05655	129.918	-1.20418	0.378564	0.0003876	0.00344345	fru
LMD38_RS05660	37.4118	-0.170205	0.665809	0.703578	0.808527	fru
LMD38_RS05665	1806.45	0.55968	0.379163	0.101267	0.255328	fru
LMD38_RS05670	32.0628	-1.15232	0.647874	0.0131525	0.059664	fru
LMD38_RS05675	107.288	-0.300241	0.423214	0.417877	0.60064	fru
LMD38_RS05680	191.486	0.184117	0.316194	0.532139	0.688052	fru
LMD38_RS05685	143.122	0.235368	0.516067	0.573945	0.713947	fru
LMD38_RS05690	16.6813	-0.126211	0.718895	0.773738	1	fru
LMD38_RS05695	208.357	0.863528	0.527124	0.0416981	0.139222	fru
LMD38_RS05700	173.944	0.456628	0.32151	0.12649	0.294132	fru
LMD38_RS05705	283.771	0.815644	0.367916	0.0143842	0.0632931	fru
LMD38_RS05710	1369.23	1.01096	0.246354	1.81798e-05	0.000258983	fru
LMD38_RS05715	680.325	1.00903	0.369983	0.00253523	0.0161586	fru
LMD38_RS05720	71.2398	-0.748248	0.41759	0.0413461	0.138275	fru
LMD38_RS05725	32.3913	-1.23626	0.53489	0.00380865	0.02264	fru
LMD38_RS05730	86.0247	-0.323412	0.51597	0.439824	0.617478	fru
LMD38_RS05735	106.176	-1.01782	0.450524	0.00834102	0.0417051	fru
LMD38_RS05740	39.565	-0.12717	0.738801	0.769118	0.854414	fru
LMD38_RS05745	2.81858	0.0637781	0.963164	0.776248	1	fru
LMD38_RS05750	119.15	0.860945	0.379162	0.0115969	0.053933	fru
LMD38_RS05755	82.1521	-0.441374	0.470081	0.266578	0.463714	fru
LMD38_RS05760	1182.12	0.205445	0.383383	0.551069	0.70158	fru
LMD38_RS05765	84.7369	-0.356918	0.690288	0.425944	0.606358	fru
LMD38_RS05770	52.7569	-0.346912	0.72892	0.432409	0.610637	fru
LMD38_RS05775	20.133	-0.543434	0.7122	0.229241	1	fru
LMD38_RS05780	31.7181	-0.311004	0.798885	0.45432	0.629106	fru
LMD38_RS05785	25.478	-0.381209	0.85876	0.328008	1	fru
LMD38_RS05790	40.5831	-0.983541	0.653852	0.0334817	0.118514	fru
LMD38_RS05795	21.419	-1.2289	0.869255	0.0129534	1	fru
LMD38_RS05800	106.057	-2.10243	0.610809	5.31806e-06	9.11027e-05	fru
LMD38_RS05805	34.3235	-0.700604	0.56579	0.109396	0.267399	fru
LMD38_RS05810	9.97186	-0.509245	0.867471	0.20685	1	fru
LMD38_RS05815	85.7796	-0.287988	0.510595	0.489163	0.658052	fru
LMD38_RS05820	27.6392	-2.23641	0.940909	0.000108444	0.00119607	fru
LMD38_RS05825	50.1111	-2.29443	0.7289	8.5893e-06	0.000137836	fru
LMD38_RS05840	47.5808	-0.41978	0.740327	0.342546	0.533462	fru
LMD38_RS05845	62.4171	-0.368866	0.685159	0.411351	0.593914	fru
LMD38_RS05850	5443.58	0.525551	0.502113	0.203067	0.3958	fru
LMD38_RS05855	5077.31	0.801158	0.517366	0.0563585	0.171397	fru
LMD38_RS05860	11134	0.349142	0.498751	0.395876	0.580237	fru
LMD38_RS05865	32.9429	0.159003	0.623069	0.72158	0.822002	fru
LMD38_RS05870	22.9219	-0.0910443	0.708565	0.836464	1	fru
LMD38_RS05875	46.4035	-0.0401296	0.592556	0.927591	0.957795	fru
LMD38_RS05880	214.342	0.429034	0.425475	0.248743	0.445355	fru
LMD38_RS05890	51.1959	0.142176	0.669242	0.750388	0.842153	fru
LMD38_RS05895	48.4237	-0.615934	0.544754	0.152263	0.332211	fru
LMD38_RS05900	7.83583	0.0930114	0.83719	0.806137	1	fru
LMD38_RS05905	7.20974	-0.406253	0.877313	NA	1	fru
LMD38_RS05910	1.65664	-0.134191	0.957862	0.583519	1	fru
LMD38_RS05920	44.6875	0.218524	0.690766	0.623882	0.74864	fru
LMD38_RS05925	35.3828	-0.120174	0.750333	0.779407	0.862703	fru
LMD38_RS05930	73.0479	-1.07191	0.460841	0.006173	0.0328466	fru
LMD38_RS05935	159.709	1.3901	0.546723	0.0012926	0.00937136	fru
LMD38_RS05940	68.1429	0.233867	0.602994	0.598302	0.730877	fru
LMD38_RS05945	504.091	0.363961	0.377317	0.284915	0.481179	fru
LMD38_RS05950	106.982	-0.98379	0.327113	0.00114564	0.00851885	fru
LMD38_RS05955	83.3893	-0.214519	0.708998	0.627908	0.7509	fru
LMD38_RS05960	161.069	-0.266572	0.374692	0.431048	0.61005	fru
LMD38_RS05965	74.4226	-0.0633674	0.36824	0.849527	0.907414	fru
LMD38_RS05970	39.9171	-0.820222	0.534738	0.0547654	0.168256	fru
LMD38_RS05975	134.364	-0.867424	0.296964	0.00186262	0.0125078	fru
LMD38_RS05980	37.7011	-0.467785	0.78828	0.278567	0.474007	fru
LMD38_RS05985	55.5825	-0.692795	0.421658	0.0607342	0.180333	fru
LMD38_RS05990	883.61	-0.0330426	0.410629	0.92742	0.957795	fru
LMD38_RS05995	1150.04	0.355888	0.447959	0.355601	0.546251	fru
LMD38_RS06000	12.984	-0.480968	0.813626	0.256351	1	fru
LMD38_RS06005	46.4915	-0.330163	0.73805	0.452066	0.62684	fru
LMD38_RS06010	25.0813	-0.204514	0.806406	0.613597	1	fru
LMD38_RS06015	78.2846	-0.262396	0.684421	0.557233	0.704348	fru
LMD38_RS06020	29.9494	-0.549139	0.712917	0.224555	0.416489	fru
LMD38_RS06025	11.9986	0.172509	0.879801	0.61972	1	fru
LMD38_RS06030	19.4354	-0.244989	0.831246	0.53252	1	fru
LMD38_RS06035	98.7735	-0.971906	0.601724	0.0308858	0.112255	fru
LMD38_RS06040	97.2948	-1.00396	0.670304	0.0312001	0.113	fru
LMD38_RS06045	59.2118	-0.423564	0.669778	0.347457	0.538426	fru
LMD38_RS06050	87.0424	-1.00242	0.444218	0.00873238	0.043236	fru
LMD38_RS06055	54.0622	-0.374276	0.682801	0.404821	0.586991	fru
LMD38_RS06060	874.585	1.32965	0.429079	0.00034351	0.00309235	fru
LMD38_RS06065	7139.18	1.4195	0.510055	0.000626624	0.00507803	fru
LMD38_RS06070	3028.89	0.63243	0.492673	0.121645	0.287473	fru
LMD38_RS06075	210.993	0.37256	0.428248	0.318762	0.513562	fru
LMD38_RS06080	1134.4	1.23453	0.373578	0.000235741	0.00230074	fru
LMD38_RS06085	857.708	0.448037	0.309423	0.121377	0.287007	fru
LMD38_RS06090	53.4945	0.412194	0.496825	0.315196	0.509839	fru
LMD38_RS06095	399.158	-0.176766	0.392214	0.614169	0.741797	fru
LMD38_RS06100	2440.14	1.01847	0.403438	0.00433037	0.0250803	fru
LMD38_RS06105	1873.54	0.823139	0.36273	0.0124886	0.0570347	fru
LMD38_RS06110	296.045	-0.524291	0.397398	0.138563	0.310669	fru
LMD38_RS06115	387.773	0.4479	0.249472	0.0608971	0.180397	fru
LMD38_RS06120	154.463	-0.253037	0.363936	0.444434	0.621076	fru
LMD38_RS06125	381.152	-0.961167	0.399249	0.00669013	0.0351383	fru
LMD38_RS06220	5.07564	-0.219539	0.873716	0.539901	1	fru
LMD38_RS06225	19.0885	-0.0472932	0.752978	0.911832	1	fru
LMD38_RS06230	200.095	0.341074	0.307951	0.236455	0.430497	fru
LMD38_RS06235	22.9317	-0.112036	0.767381	0.79056	1	fru
LMD38_RS06240	351.414	-0.329959	0.373152	0.328164	0.521262	fru
LMD38_RS06245	2809.01	0.41936	0.520072	0.318571	0.513539	fru
LMD38_RS06250	5663.96	0.675964	0.509613	0.104479	0.25944	fru
LMD38_RS06255	2398.97	0.592447	0.467436	0.134517	0.306819	fru
LMD38_RS06260	3962.75	0.646836	0.469847	0.103362	0.257612	fru
LMD38_RS06265	3861.44	0.478409	0.512072	0.251511	0.446886	fru
LMD38_RS06270	3665.88	0.25747	0.483858	0.524117	0.68519	fru
LMD38_RS06275	6222.63	0.207767	0.504	0.615333	0.742178	fru
LMD38_RS06280	341.706	-0.384456	0.271326	0.135893	0.308399	fru
LMD38_RS06285	51.4948	0.177596	0.700521	0.688887	0.797928	fru
LMD38_RS06290	172.832	0.344034	0.519405	0.412807	0.595363	fru
LMD38_RS06295	1999.99	-0.0960023	0.513077	0.818051	0.88757	fru
LMD38_RS06300	160.7	0.267146	0.373492	0.428904	0.60929	fru
LMD38_RS06305	1592.67	-0.621509	0.41898	0.0910832	0.236914	fru
LMD38_RS06310	441.228	-0.550943	0.40061	0.121802	0.28751	fru
LMD38_RS06315	1692.67	0.80591	0.421139	0.0289147	0.107306	fru
LMD38_RS06320	125.513	-0.509872	0.34154	0.10467	0.259755	fru
LMD38_RS06325	72.5155	-0.0802816	0.522456	0.848793	0.907078	fru
LMD38_RS06330	11.8168	-0.497952	0.839321	0.230185	1	fru
LMD38_RS06335	5.58507	-0.376495	0.920393	0.274239	1	fru
LMD38_RS06340	373.522	-0.922557	0.420961	0.0122953	0.0564694	fru
LMD38_RS06345	7599.59	1.13306	0.529203	0.00766536	0.0389408	fru
LMD38_RS06350	19.6777	-0.303305	0.791822	0.468554	1	fru
LMD38_RS06355	242.975	-0.481272	0.319309	0.10523	0.260682	fru
LMD38_RS06360	43.5869	-0.203441	0.493417	0.61865	0.744655	fru
LMD38_RS06365	220.705	0.234864	0.511475	0.573019	0.713418	fru
LMD38_RS06370	41.9817	-0.0304541	0.65874	0.945677	0.971275	fru
LMD38_RS06375	91.9707	-0.0372519	0.344348	0.906299	0.947123	fru
LMD38_RS06380	57.2539	-0.544147	0.470147	0.170826	0.355315	fru
LMD38_RS06385	198.961	-0.944608	0.342687	0.00266686	0.0168539	fru
LMD38_RS06390	850.182	-0.00190311	0.441966	0.996023	0.99783	fru
LMD38_RS06395	44.9251	-0.365802	0.71688	0.410988	0.5936	fru
LMD38_RS06400	115.5	0.632027	0.564913	0.148095	0.325786	fru
LMD38_RS06405	155.073	0.700698	0.409123	0.0525615	0.164467	fru
LMD38_RS06410	13.4956	0.319468	0.740111	0.465879	1	fru
LMD38_RS06415	321.102	1.50196	0.441623	6.91869e-05	0.000821192	fru
LMD38_RS06420	562.212	1.36309	0.281832	2.70355e-07	7.01747e-06	fru
LMD38_RS06425	183.883	1.53963	0.592922	0.000638848	0.00516678	fru
LMD38_RS06430	428.983	2.33104	0.372899	1.18625e-12	1.14671e-10	fru
LMD38_RS06435	1416.16	3.3173	0.366502	4.80947e-22	1.95264e-19	fru
LMD38_RS06440	75.0331	0.662458	0.521699	0.116025	0.277913	fru
LMD38_RS06445	6.79307	0.60585	0.949417	0.110073	1	fru
LMD38_RS06450	321.61	1.25583	0.447765	0.0010435	0.00784328	fru
LMD38_RS06455	76.0812	-0.23448	0.428198	0.530332	0.687744	fru
LMD38_RS06460	1889.16	-0.499917	0.463535	0.204301	0.396875	fru
LMD38_RS06465	153.929	-0.496099	0.414103	0.173909	0.359142	fru
LMD38_RS06470	92.682	-0.589866	0.360159	0.0720964	0.203554	fru
LMD38_RS06475	74.6281	-0.199814	0.724458	NA	1	fru
LMD38_RS06480	58.0828	-0.335056	0.779911	0.431034	0.61005	fru
LMD38_RS06485	124.358	-0.385536	0.72693	0.384908	0.570221	fru
LMD38_RS06490	63.4398	-0.146315	0.715677	0.739519	0.835174	fru
LMD38_RS06495	38.9074	-0.159595	0.686959	0.7201	0.820678	fru
LMD38_RS06500	106.335	-0.647072	0.521971	0.124819	0.291748	fru
LMD38_RS06505	30.0101	-0.589894	0.594776	0.18471	0.373282	fru
LMD38_RS06510	114.399	1.01184	0.492611	0.0131934	0.0597824	fru
LMD38_RS06515	804.004	0.99649	0.45206	0.00998603	0.0483233	fru
LMD38_RS06520	344.966	1.57331	0.376096	2.61749e-06	5.10913e-05	fru
LMD38_RS06525	467.011	1.18504	0.270913	3.85846e-06	6.87076e-05	fru
LMD38_RS06530	200.864	-0.45719	0.489276	0.261163	0.458004	fru
LMD38_RS06535	75.7327	-0.0460354	0.379291	0.89286	0.937179	fru
LMD38_RS06540	404.653	0.00552581	0.363056	0.986651	0.994243	fru
LMD38_RS06545	66.869	-0.438249	0.519268	0.296917	0.492235	fru
LMD38_RS06550	99.3843	-0.464302	0.358424	0.155392	0.335783	fru
LMD38_RS06555	61.0436	-0.469313	0.562608	0.281249	0.47737	fru
LMD38_RS06560	123.044	-0.297429	0.500215	0.470197	0.642978	fru
LMD38_RS06565	33.9128	-0.250565	0.687422	0.574711	0.714189	fru
LMD38_RS06570	156.247	-0.526562	0.319955	0.076796	0.21341	fru
LMD38_RS06575	43.547	0.0141287	0.624512	0.974728	0.987374	fru
LMD38_RS06580	69.6772	-0.800669	0.54549	0.0632729	0.184812	fru
LMD38_RS06585	236.954	0.658342	0.394859	0.0615532	0.182015	fru
LMD38_RS06590	242.02	0.499551	0.351248	0.120231	0.285627	fru
LMD38_RS06595	12.9798	-0.450287	0.887892	0.239038	1	fru
LMD38_RS06600	722.343	0.657543	0.347105	0.0388378	0.131505	fru
LMD38_RS06605	488.891	1.47564	0.325941	8.2385e-07	1.82778e-05	fru
LMD38_RS06610	28.3949	0.304446	0.676719	0.497121	0.664794	fru
LMD38_RS06615	839.123	-0.483205	0.447003	0.209076	0.401464	fru
LMD38_RS06620	25.8417	-0.0652314	0.765444	0.877149	1	fru
LMD38_RS06625	98.7151	-0.0532194	0.410842	0.883401	0.931106	fru
LMD38_RS06630	874.936	1.35665	0.382109	6.87071e-05	0.000818038	fru
LMD38_RS06635	11854.8	1.01984	0.489645	0.0121679	0.056011	fru
LMD38_RS06640	10926.5	1.16069	0.547255	0.00727879	0.0373602	fru
LMD38_RS06645	50333.1	1.14851	0.543335	0.00768744	0.0389408	fru
LMD38_RS06650	186.452	-0.129481	0.288995	0.634877	0.756513	fru
LMD38_RS06655	345.428	0.0903277	0.336228	0.770989	0.855717	fru
LMD38_RS06660	63.5448	-0.457404	0.658961	0.31091	0.504515	fru
LMD38_RS06665	475.934	-2.96662	0.478097	6.98222e-13	7.26867e-11	fru
LMD38_RS06670	32.1153	-0.463107	0.758607	0.292701	0.488423	fru
LMD38_RS06675	91.4914	-0.22704	0.64527	0.612299	0.740743	fru
LMD38_RS06680	57.1801	-0.466569	0.584893	0.290643	0.486368	fru
LMD38_RS06685	31.1266	0.451089	0.65734	0.317463	0.512281	fru
LMD38_RS06690	114.601	-0.555258	0.647699	0.219862	0.410976	fru
LMD38_RS06695	50.9578	-0.262661	0.603307	0.554213	0.702939	fru
LMD38_RS06700	45.6729	-0.273036	0.618629	0.540724	0.69385	fru
LMD38_RS06705	170.72	-0.38455	0.303975	0.177055	0.362277	fru
LMD38_RS06710	144.093	-0.735226	0.574698	0.0951407	0.243858	fru
LMD38_RS06715	6.86772	-0.17871	0.912618	0.569719	1	fru
LMD38_RS06720	48.7326	-0.39244	0.803263	0.349984	0.540897	fru
LMD38_RS06725	27.4957	-0.0686246	0.765948	0.870756	0.923288	fru
LMD38_RS06730	34.7542	-0.00914817	0.764224	0.982711	0.992243	fru
LMD38_RS06735	59.0814	-0.290064	0.729215	0.509681	0.67514	fru
LMD38_RS06740	58.4757	-0.340091	0.744134	NA	1	fru
LMD38_RS06745	51.7462	-0.517033	0.722125	0.250379	0.445851	fru
LMD38_RS06750	97.9672	0.102957	0.673548	0.817574	0.887498	fru
LMD38_RS06755	138.552	-0.671776	0.330584	0.0279977	0.104942	fru
LMD38_RS06765	2149.23	0.824701	0.427286	0.0268938	0.101726	fru
LMD38_RS06770	237.102	0.512295	0.42819	0.170286	0.354727	fru
LMD38_RS06775	74.4714	1.06567	0.593088	0.0175122	0.073081	fru
LMD38_RS06780	412.792	0.142916	0.531215	0.736322	0.83365	fru
LMD38_RS06785	47.4878	-0.390247	0.604897	0.38067	0.567788	fru
LMD38_RS06790	6.76194	0.236339	0.86762	0.517489	1	fru
LMD38_RS06795	110.731	-1.19733	0.307256	2.88311e-05	0.000387596	fru
LMD38_RS06800	75.356	-0.621388	0.511013	0.136111	0.308721	fru
LMD38_RS06805	96.8806	-0.90307	0.538509	0.0351515	0.123132	fru
LMD38_RS06810	635.733	0.500995	0.351894	0.119712	0.284962	fru
LMD38_RS06815	599.191	1.22242	0.365269	0.000211284	0.00209734	fru
LMD38_RS06820	1158.93	0.91212	0.442418	0.0168057	0.0708525	fru
LMD38_RS06825	269.041	1.25971	0.39027	0.000283227	0.00266181	fru
LMD38_RS06830	131.664	-0.319685	0.366162	0.336277	0.527544	fru
LMD38_RS06835	1238.84	0.282399	0.297721	0.312871	0.507291	fru
LMD38_RS06840	490.145	0.374377	0.515767	0.371172	0.559785	fru
LMD38_RS06845	5274.31	1.46668	0.409451	4.18237e-05	0.000539061	fru
LMD38_RS06850	267.155	-0.738694	0.441961	0.0528778	0.164635	fru
LMD38_RS06855	66.4931	-2.17174	0.608973	2.60431e-06	5.10797e-05	fru
LMD38_RS06860	92.9534	1.00018	0.586657	0.0249433	0.0966316	fru
LMD38_RS06865	85.4424	-0.244463	0.747911	0.572443	0.713285	fru
LMD38_RS06870	367.882	-0.693853	0.2954	0.0124764	0.0570347	fru
LMD38_RS06875	401.63	0.605725	0.26535	0.0165004	0.0696381	fru
LMD38_RS06880	160.669	0.266298	0.426704	0.474986	0.646715	fru
LMD38_RS06885	33.9785	-0.46507	0.675607	0.303124	0.498655	fru
LMD38_RS06890	89.2199	0.586847	0.466254	0.137616	0.309884	fru
LMD38_RS06895	78.3948	0.928326	0.585445	0.0370274	0.127306	fru
LMD38_RS06900	47.4079	0.445349	0.761514	NA	1	fru
LMD38_RS06905	150.076	0.162204	0.460371	0.67912	0.790766	fru
LMD38_RS06910	189.93	0.869839	0.367983	0.00903639	0.0443625	fru
LMD38_RS06915	144.161	0.561258	0.46291	0.153749	0.333506	fru
LMD38_RS06920	138.842	0.12768	0.564394	0.769183	0.854414	fru
LMD38_RS06925	85.8265	0.222918	0.57722	0.61129	0.740184	fru
LMD38_RS06935	4.24964	-0.113201	0.918576	0.704924	1	fru
LMD38_RS06940	113.714	0.702988	0.412732	0.053299	0.165673	fru
LMD38_RS06945	81.5561	-1.61567	0.404637	4.84712e-06	8.33869e-05	fru
LMD38_RS06950	87.4904	-0.739792	0.514276	0.0770729	0.213731	fru
LMD38_RS06955	41.7258	-1.19857	0.549031	0.0056623	0.0311082	fru
LMD38_RS28690	4.29234	0.221973	0.90093	0.5053	1	fru
LMD38_RS06965	45.5602	-0.155179	0.749474	NA	1	fru
LMD38_RS06970	124.623	-0.791081	0.446723	0.0395164	0.133364	fru
LMD38_RS06975	57.4805	-0.32793	0.63987	0.464888	0.638513	fru
LMD38_RS06980	895.731	-0.170484	0.397248	0.630099	0.753166	fru
LMD38_RS06985	46.0789	-0.411693	0.511419	0.32334	0.518201	fru
LMD38_RS06990	14.4764	-0.312601	0.830364	0.433374	1	fru
LMD38_RS06995	16.2641	-0.400301	0.847804	0.315285	1	fru
LMD38_RS07000	122.791	-0.179039	0.359368	0.584696	0.722144	fru
LMD38_RS07005	44.4041	0.10174	0.57927	0.816668	0.887498	fru
LMD38_RS07010	45.5533	-0.179038	0.575829	0.682829	0.793896	fru
LMD38_RS07015	1.37379	0.0927046	0.980798	0.629025	1	fru
LMD38_RS07020	386.596	-0.141442	0.359417	0.66595	0.780364	fru
LMD38_RS07025	91.7695	-0.74505	0.438772	0.0497351	0.158567	fru
LMD38_RS07030	183.236	-0.167866	0.470426	0.672744	0.786223	fru
LMD38_RS07035	101.948	-0.608795	0.562925	0.162879	0.346223	fru
LMD38_RS07040	78.1161	-1.38734	0.418557	0.000140766	0.00150692	fru
LMD38_RS07045	44.9299	-0.567786	0.659913	0.210729	0.402616	fru
LMD38_RS07050	23.723	-0.781641	0.722385	0.0907439	1	fru
LMD38_RS07055	188.783	-0.272189	0.374168	0.420894	0.602239	fru
LMD38_RS07060	201.479	0.475624	0.438199	0.210206	0.401996	fru
LMD38_RS07065	499.11	-0.30705	0.497553	0.454645	0.629342	fru
LMD38_RS07070	170.116	-1.38206	0.331395	5.49862e-06	9.30183e-05	fru
LMD38_RS07075	81.1615	-0.680014	0.546178	0.114589	0.275939	fru
LMD38_RS07080	84.4126	-0.989344	0.427422	0.00787067	0.0397238	fru
LMD38_RS07085	52.6616	-0.174486	0.647396	0.696699	0.803808	fru
LMD38_RS07090	2170.08	1.32487	0.478183	0.000911148	0.00696659	fru
LMD38_RS07095	54.7879	-0.820414	0.488387	0.043543	0.143541	fru
LMD38_RS07105	165.529	-0.450028	0.56722	0.302893	0.498655	fru
LMD38_RS07110	93.4975	-0.956823	0.367642	0.0040301	0.0236114	fru
LMD38_RS07120	62.6462	-0.25655	0.663608	0.567125	0.711664	fru
LMD38_RS07125	675.235	-0.747267	0.434893	0.0476931	0.153678	fru
LMD38_RS07130	41.7884	-0.442036	0.624764	0.32442	0.518344	fru
LMD38_RS07135	396.499	0.478426	0.260755	0.0544345	0.167591	fru
LMD38_RS07140	769.249	0.640172	0.358839	0.0502382	0.159474	fru
LMD38_RS07145	24.2922	-0.609987	0.800664	0.165993	1	fru
LMD38_RS07150	75.135	-0.460906	0.696526	0.30625	0.499804	fru
LMD38_RS07155	141.215	-0.998792	0.363377	0.00243804	0.0156605	fru
LMD38_RS07160	344.743	0.353452	0.374309	0.296051	0.4912	fru
LMD38_RS07165	47.4344	-0.694638	0.637378	0.125951	0.293381	fru
LMD38_RS07170	39.9712	0.694833	0.693748	0.129557	0.298864	fru
LMD38_RS07175	148.204	-0.975737	0.567236	0.0264201	0.10025	fru
LMD38_RS07180	9.61354	-0.288482	0.914649	0.383633	1	fru
LMD38_RS07185	31.3514	-0.415066	0.703106	0.3547	0.545693	fru
LMD38_RS07190	34.5248	-0.2633	0.741098	0.545774	0.697903	fru
LMD38_RS07195	224.288	-0.0909861	0.406024	0.800346	0.875562	fru
LMD38_RS07200	101.971	-0.625347	0.462241	0.111641	0.270542	fru
LMD38_RS07205	957.713	0.754852	0.427866	0.0430746	0.142413	fru
LMD38_RS07210	586.786	0.121899	0.412462	0.737646	0.8341	fru
LMD38_RS07215	69.1121	-0.754396	0.547213	0.0804683	0.220149	fru
LMD38_RS07220	243.938	-0.141904	0.316994	0.630897	0.753711	fru
LMD38_RS07225	853.405	1.04842	0.266121	3.37013e-05	0.000446272	fru
LMD38_RS07230	51.5578	0.091716	0.603144	0.836159	0.898798	fru
LMD38_RS07235	146.156	-0.430405	0.371701	0.200707	0.392897	fru
LMD38_RS07240	250.512	1.23522	0.378878	0.000273214	0.00258528	fru
LMD38_RS07245	19.4781	-0.224363	0.76696	0.597844	1	fru
LMD38_RS07250	3695.23	2.54272	0.59242	4.02442e-08	1.2765e-06	fru
LMD38_RS07255	3979.17	2.36988	0.599665	2.85744e-07	7.34253e-06	fru
LMD38_RS07260	8522.24	2.79021	0.556789	7.67037e-10	3.75201e-08	fru
LMD38_RS07265	4993.93	2.06484	0.551824	1.92225e-06	3.8445e-05	fru
LMD38_RS07270	12.4342	0.0160887	0.767963	0.969477	1	fru
LMD38_RS07275	74.5229	0.0461004	0.479642	0.908717	0.948171	fru
LMD38_RS07280	48.0691	-0.434469	0.622158	0.332327	0.523742	fru
LMD38_RS07285	157.534	-4.02011	0.637483	1.31011e-12	1.23698e-10	fru
LMD38_RS07290	367.084	-4.7225	0.591203	5.52693e-18	1.31996e-15	fru
LMD38_RS07295	22.6153	-2.89102	1.08063	1.28839e-05	1	fru
LMD38_RS07300	158.256	-1.38274	0.451747	0.000321895	0.00293026	fru
LMD38_RS07305	566.225	-0.183311	0.355488	0.572431	0.713285	fru
LMD38_RS07310	62.224	-0.748632	0.544821	0.082175	0.223064	fru
LMD38_RS07315	76.977	-0.717749	0.496802	0.0804121	0.220144	fru
LMD38_RS07320	40.4487	-0.813357	0.680384	0.0781106	0.215295	fru
LMD38_RS07325	105.288	0.258657	0.630736	0.563218	0.709585	fru
LMD38_RS07330	7.79943	1.25051	1.17165	0.00714719	1	fru
LMD38_RS07335	4007.62	0.0293691	0.430026	0.93754	0.96536	fru
LMD38_RS07340	42.4316	-0.439914	0.629695	0.327342	0.520992	fru
LMD38_RS07345	13.5972	-0.222142	0.803999	0.585534	1	fru
LMD38_RS07350	28.7028	-0.778311	0.777135	0.0898232	0.235127	fru
LMD38_RS07355	150.386	0.207523	0.303939	0.466348	0.639437	fru
LMD38_RS07360	496.39	0.158411	0.289557	0.561922	0.709183	fru
LMD38_RS07365	90.8341	0.118028	0.654221	0.791899	0.870515	fru
LMD38_RS07370	195.236	-0.383379	0.470069	0.33453	0.525616	fru
LMD38_RS07375	7.339	-0.336225	0.802529	NA	1	fru
LMD38_RS07380	23294.7	0.249682	0.49313	0.541151	0.693959	fru
LMD38_RS07385	68.6381	0.33896	0.431895	0.367184	0.556564	fru
LMD38_RS07390	174.168	-0.783896	0.36232	0.0172868	0.0725046	fru
LMD38_RS07395	273.007	-1.34719	0.347834	2.08524e-05	0.000292944	fru
LMD38_RS07400	234.82	-1.28081	0.391463	0.000229643	0.00226299	fru
LMD38_RS07405	125.07	-0.852613	0.394446	0.0152911	0.0661558	fru
LMD38_RS07410	28.4654	-1.15776	0.742862	0.016236	0.0691772	fru
LMD38_RS07415	81.369	-0.0230658	0.511925	0.955869	0.976554	fru
LMD38_RS07420	13.0655	-0.0670378	0.829642	0.861384	1	fru
LMD38_RS07425	186.075	-0.000857474	0.625187	0.998466	0.998712	fru
LMD38_RS07430	0.834983	-0.0224966	0.982351	0.899931	1	fru
LMD38_RS07435	28.9999	-0.564307	0.646963	0.212541	0.403988	fru
LMD38_RS07440	309.441	-0.371382	0.3223	0.214938	0.406449	fru
LMD38_RS07445	52.2829	-0.924245	0.589611	0.0383901	0.13043	fru
LMD38_RS07450	16.6992	-0.771836	0.730324	0.0944258	1	fru
LMD38_RS07455	99.6454	-0.246644	0.389461	0.479443	0.650174	fru
LMD38_RS07460	225.784	-0.402318	0.420659	0.275595	0.471021	fru
LMD38_RS07465	8.98604	-0.169762	0.813285	0.67056	1	fru
LMD38_RS07470	20.6102	-0.437621	0.6998	0.33027	1	fru
LMD38_RS07475	93.213	-0.42522	0.506288	0.305138	0.499617	fru
LMD38_RS07480	69.4134	0.387823	0.452755	0.317463	0.512281	fru
LMD38_RS07485	126.444	-0.0108551	0.44007	0.977255	0.988079	fru
LMD38_RS07490	98.5382	-0.341581	0.470603	0.390213	0.574633	fru
LMD38_RS07495	166.283	0.137404	0.358526	0.674323	0.786797	fru
LMD38_RS07500	89.3355	-0.586626	0.535124	0.169136	0.353237	fru
LMD38_RS07505	1272.91	0.566834	0.403806	0.113509	0.273663	fru
LMD38_RS07510	765.414	2.03556	0.55683	3.02718e-06	5.69705e-05	fru
LMD38_RS07515	57.5616	-0.233761	0.409392	0.518362	0.681084	fru
LMD38_RS07520	284.08	-2.05516	0.514143	6.99462e-07	1.58649e-05	fru
LMD38_RS07525	131.227	0.0970479	0.445046	0.800275	0.875562	fru
LMD38_RS07530	266.194	-0.194495	0.263401	0.438549	0.616976	fru
LMD38_RS07535	897.179	0.33254	0.376567	0.327825	0.520992	fru
LMD38_RS07540	1082.51	0.378613	0.512328	0.364143	0.553094	fru
LMD38_RS07545	1246.46	0.956161	0.279224	0.000292813	0.00272074	fru
LMD38_RS07550	1096.08	0.912073	0.258176	0.000212104	0.00210035	fru
LMD38_RS07555	407.301	0.333171	0.355632	0.305023	0.499617	fru
LMD38_RS07560	148.003	0.493191	0.382785	0.151768	0.331636	fru
LMD38_RS07565	436.694	0.743093	0.310077	0.0102751	0.0492563	fru
LMD38_RS07570	209.912	-0.601077	0.455214	0.122542	0.288753	fru
LMD38_RS07575	391.163	0.7818	0.324527	0.00937009	0.0456128	fru
LMD38_RS07580	262.83	0.823706	0.32869	0.00674837	0.0352617	fru
LMD38_RS07585	113.17	-0.247109	0.537531	0.562615	0.709585	fru
LMD38_RS07590	2403.07	0.39826	0.38731	0.251424	0.446886	fru
LMD38_RS07595	3316.13	0.882994	0.447141	0.021582	0.086328	fru
LMD38_RS07600	73.8033	-0.832538	0.64874	0.0693172	0.198468	fru
LMD38_RS07605	63.5891	-0.613848	0.593073	0.167326	0.351083	fru
LMD38_RS07610	93.3315	-0.764355	0.645077	0.0939657	0.24237	fru
LMD38_RS07615	23.1892	-1.09158	0.889122	0.0228896	1	fru
LMD38_RS07620	849.878	0.279378	0.368059	0.402671	0.585441	fru
LMD38_RS07625	412.365	0.250432	0.489608	0.538293	0.692481	fru
LMD38_RS07630	261.853	0.914458	0.377508	0.00711919	0.0367781	fru
LMD38_RS07635	91.4421	0.190319	0.505183	0.645722	0.764993	fru
LMD38_RS07640	1020.05	0.936219	0.381178	0.0062336	0.0330829	fru
LMD38_RS07645	634.157	0.310178	0.451546	0.423175	0.603898	fru
LMD38_RS07650	14675.3	0.232295	0.515387	0.578701	0.716537	fru
LMD38_RS07655	47.4016	-0.257374	0.573879	0.55669	0.704136	fru
LMD38_RS07660	90.2737	-0.489522	0.453677	0.207589	0.400385	fru
LMD38_RS07665	404.504	-0.179261	0.293594	0.516709	0.680103	fru
LMD38_RS07670	113.743	-0.476507	0.489879	0.241895	0.438043	fru
LMD38_RS07675	148.793	-1.18553	0.400885	0.000825539	0.00642086	fru
LMD38_RS07680	677.347	0.971912	0.389484	0.00520597	0.029042	fru
LMD38_RS07685	1150.41	2.14559	0.416569	1.8472e-09	8.24135e-08	fru
LMD38_RS07690	1781.21	3.12944	0.448148	4.75083e-15	8.38625e-13	fru
LMD38_RS07695	10762.6	2.52057	0.549676	1.00364e-08	3.57436e-07	fru
LMD38_RS07700	2153.79	1.78334	0.50424	1.34791e-05	0.000204964	fru
LMD38_RS07705	1847.57	3.29693	0.381464	1.66001e-20	4.81404e-18	fru
LMD38_RS07710	1549.68	2.29903	0.499542	1.70361e-08	5.7639e-07	fru
LMD38_RS07715	1316.58	2.14421	0.371169	5.29796e-11	3.84102e-09	fru
LMD38_RS07720	82.3157	-0.769678	0.58413	0.0826723	0.223508	fru
LMD38_RS07725	104.432	-0.448215	0.691452	0.319779	0.5148	fru
LMD38_RS07730	13.99	0.0396473	0.754583	0.92592	1	fru
LMD38_RS07735	14.1245	0.437197	0.76104	0.318152	1	fru
LMD38_RS07740	53.6159	-0.350951	0.719148	0.429317	0.60945	fru
LMD38_RS07745	233.502	-1.28342	0.321163	1.53238e-05	0.000223794	fru
LMD38_RS07750	208.599	1.44816	0.383292	2.15406e-05	0.000301568	fru
LMD38_RS07755	247.996	-0.294783	0.646929	0.511185	0.67647	fru
LMD38_RS07760	287.323	-0.784059	0.415186	0.0317989	0.114225	fru
LMD38_RS07765	132.91	-0.0505021	0.429979	0.892803	0.937179	fru
LMD38_RS07770	452.078	0.589986	0.368864	0.077541	0.214307	fru
LMD38_RS07775	42.1792	0.102332	0.678749	0.818469	0.887786	fru
LMD38_RS07780	281.737	0.700436	0.267779	0.00594821	0.0319019	fru
LMD38_RS07785	636.324	0.491358	0.266652	0.0528621	0.164635	fru
LMD38_RS07790	168.887	-0.319749	0.457797	0.413161	0.595469	fru
LMD38_RS07795	308.256	-0.0182719	0.392384	0.958455	0.978212	fru
LMD38_RS07800	828.006	0.757498	0.358676	0.020411	0.0826209	fru
LMD38_RS07805	384.024	0.908366	0.404461	0.0111725	0.0523793	fru
LMD38_RS07810	399.801	0.0536866	0.370305	0.872856	0.924573	fru
LMD38_RS07815	1017.89	-0.00495455	0.360555	0.987965	0.994579	fru
LMD38_RS07820	253.684	0.158936	0.262717	0.525757	0.685477	fru
LMD38_RS07825	603.175	0.57249	0.419366	0.119891	0.285154	fru
LMD38_RS07830	124.421	0.519083	0.524044	0.218902	0.410387	fru
LMD38_RS07835	0.717036	-0.00398022	0.981929	0.982296	1	fru
LMD38_RS07840	94.818	0.247895	0.524909	0.557052	0.704338	fru
LMD38_RS07845	199.927	0.376443	0.414524	0.3026	0.498655	fru
LMD38_RS07850	2461.3	1.35635	0.377127	5.81535e-05	0.000709018	fru
LMD38_RS07855	347.955	1.07959	0.335076	0.000462782	0.0039144	fru
LMD38_RS07860	204.774	-0.839983	0.364239	0.0110529	0.0520587	fru
LMD38_RS07865	630.834	-0.341185	0.349344	0.286579	0.482984	fru
LMD38_RS07870	1272.04	-0.00846657	0.409721	0.981349	0.991215	fru
LMD38_RS07875	1373.53	0.876212	0.428839	0.0189727	0.078202	fru
LMD38_RS07880	448.237	0.531139	0.550788	0.218935	0.410387	fru
LMD38_RS07885	397.192	1.34976	0.281165	3.35698e-07	8.26022e-06	fru
LMD38_RS07890	1721.83	0.375092	0.306198	0.19073	0.380897	fru
LMD38_RS07895	456.626	0.135982	0.338762	0.663202	0.778208	fru
LMD38_RS07900	645.25	0.706487	0.489652	0.0826856	0.223508	fru
LMD38_RS07905	3998.21	1.06624	0.475945	0.0076246	0.0388405	fru
LMD38_RS07910	353.387	0.519239	0.492574	0.203675	0.396574	fru
LMD38_RS07915	677.602	2.53776	0.522781	2.43016e-09	1.0371e-07	fru
LMD38_RS07920	103.555	0.335127	0.361991	0.309051	0.502182	fru
LMD38_RS07925	244.18	-0.389105	0.340818	0.214902	0.406449	fru
LMD38_RS07930	1716.95	0.601037	0.486638	0.138434	0.310669	fru
LMD38_RS07935	145.113	0.681973	0.321312	0.0223338	0.0887234	fru
LMD38_RS07940	412.31	0.537706	0.338266	0.0845397	0.226108	fru
LMD38_RS07945	51.7911	0.648442	0.578378	0.141487	0.315451	fru
LMD38_RS07950	3073.04	1.12283	0.414203	0.00200605	0.0132647	fru
LMD38_RS07955	13130.5	0.335167	0.533672	0.430941	0.61005	fru
LMD38_RS07960	65.0212	-0.766458	0.700556	0.0965369	0.246348	fru
LMD38_RS07965	2763.83	1.05969	0.390816	0.00235542	0.0153008	fru
LMD38_RS07970	894.882	0.606049	0.41969	0.0998408	0.252399	fru
LMD38_RS07975	415.491	0.299052	0.333471	0.331842	0.523419	fru
LMD38_RS07980	365.628	0.267191	0.364116	0.419555	0.601672	fru
LMD38_RS07985	2226.35	0.995527	0.427529	0.00749833	0.0383899	fru
LMD38_RS07990	2505.85	0.525592	0.474451	0.188352	0.378194	fru
LMD38_RS07995	2178.72	0.633229	0.462018	0.107087	0.26334	fru
LMD38_RS08000	4226.19	0.523495	0.502144	0.204853	0.397166	fru
LMD38_RS08005	2100.01	1.31644	0.511724	0.00157078	0.0109731	fru
LMD38_RS08010	1308.24	0.684249	0.539181	0.110231	0.268147	fru
LMD38_RS08015	639.577	1.35818	0.343224	1.43902e-05	0.000215587	fru
LMD38_RS08020	152.745	1.21383	0.332753	7.2985e-05	0.000855951	fru
LMD38_RS08025	357.414	0.546085	0.34635	0.0857569	0.227564	fru
LMD38_RS08030	1002	0.193995	0.398872	0.584828	0.722144	fru
LMD38_RS08035	2946.06	-0.451911	0.484696	0.264099	0.460585	fru
LMD38_RS08040	4500.19	0.744121	0.421	0.043694	0.143758	fru
LMD38_RS08045	420.138	0.181063	0.352557	0.574602	0.714189	fru
LMD38_RS08050	898.805	0.939643	0.448904	0.0147048	0.0644723	fru
LMD38_RS08055	139.95	1.46447	0.553896	0.000759958	0.00601249	fru
LMD38_RS08060	1380.59	0.807212	0.543173	0.0606386	0.180229	fru
LMD38_RS08065	6678.55	0.945458	0.465035	0.0164514	0.0695032	fru
LMD38_RS08070	1241.23	-0.320984	0.517189	0.443806	0.620712	fru
LMD38_RS08075	985.309	0.399035	0.546762	0.353744	0.544947	fru
LMD38_RS08080	160.598	0.404854	0.455731	0.298725	0.494223	fru
LMD38_RS08085	1348.07	0.651625	0.407339	0.0705774	0.200521	fru
LMD38_RS08090	4257.23	-0.240672	0.535965	0.572327	0.713285	fru
LMD38_RS08095	4024.68	1.00107	0.435237	0.00791616	0.039826	fru
LMD38_RS08100	106.381	-0.104876	0.398997	0.767776	0.853786	fru
LMD38_RS08105	392.778	0.398106	0.280234	0.133486	0.305585	fru
LMD38_RS08110	27.4322	0.0127706	0.735299	0.976493	0.988079	fru
LMD38_RS08115	97.9746	-0.718212	0.582773	0.104766	0.259835	fru
LMD38_RS08120	61.699	-0.213533	0.57065	0.625053	0.749031	fru
LMD38_RS08125	3079.99	1.2321	0.455338	0.00147617	0.0104231	fru
LMD38_RS08130	3038.1	1.40015	0.504101	0.000683306	0.00548265	fru
LMD38_RS08135	1429.15	1.71605	0.352341	6.07241e-08	1.81279e-06	fru
LMD38_RS08140	1271.6	0.0223227	0.335142	0.9425	0.969729	fru
LMD38_RS08145	73.7725	-0.472516	0.63778	0.294094	0.488553	fru
LMD38_RS08150	24.232	0.49167	0.68354	0.276794	1	fru
LMD38_RS08155	369.182	-0.706237	0.327464	0.0198747	0.0810966	fru
LMD38_RS08160	144.571	-1.73728	0.454964	5.73957e-06	9.62919e-05	fru
LMD38_RS08165	1628.27	-0.850708	0.464701	0.0309115	0.112255	fru
LMD38_RS08170	350.583	-0.904748	0.358312	0.00553435	0.0304877	fru
LMD38_RS08175	152.567	-0.43481	0.315027	0.138771	0.310781	fru
LMD38_RS08180	177.745	-0.32446	0.329446	0.287511	0.483752	fru
LMD38_RS08185	1073.52	1.10221	0.431398	0.00322636	0.019787	fru
LMD38_RS08190	1537.99	0.898818	0.450964	0.0200278	0.0814759	fru
LMD38_RS08195	171.78	0.310184	0.347108	0.33012	0.522121	fru
LMD38_RS08200	21.9325	0.123866	0.706517	0.779196	1	fru
LMD38_RS08205	381.157	0.121744	0.421349	0.741782	0.836333	fru
LMD38_RS08210	2055.34	0.616731	0.459214	0.115136	0.276763	fru
LMD38_RS08215	116.753	1.916	0.419586	1.02916e-07	2.90166e-06	fru
LMD38_RS08220	931.64	1.40182	0.353591	1.21306e-05	0.000186554	fru
LMD38_RS08225	663.018	-0.386792	0.392828	0.270466	0.466487	fru
LMD38_RS08230	1391.86	0.14739	0.431047	0.694599	0.802069	fru
LMD38_RS08235	6186.74	0.65337	0.450818	0.0911478	0.236914	fru
LMD38_RS08240	105.74	0.394403	0.412564	0.278467	0.474007	fru
LMD38_RS08245	96.9322	-0.652996	0.498964	0.112571	0.272056	fru
LMD38_RS08250	61.0047	-0.211291	0.648242	0.63714	0.758144	fru
LMD38_RS08255	7158.05	1.50516	0.487533	0.000188376	0.0019168	fru
LMD38_RS08260	3463.72	1.53279	0.555816	0.000433947	0.00375655	fru
LMD38_RS08265	889.905	1.02489	0.351824	0.00141105	0.0100104	fru
LMD38_RS08270	295.974	0.268747	0.436074	0.47755	0.649097	fru
LMD38_RS08275	201.135	-0.45984	0.5586	0.289684	0.485653	fru
LMD38_RS08280	1334.13	0.402976	0.313688	0.168534	0.352515	fru
LMD38_RS08285	1907.16	0.993577	0.471934	0.0124824	0.0570347	fru
LMD38_RS08290	129.47	0.0289001	0.507845	0.944493	0.970796	fru
LMD38_RS08295	6.9035	-0.0182535	0.813145	0.96313	1	fru
LMD38_RS08300	583.376	1.70487	0.375236	3.04998e-07	7.61943e-06	fru
LMD38_RS08305	91.2802	-0.178057	0.604204	0.688316	0.797536	fru
LMD38_RS08310	10.7042	-0.256496	0.743714	0.555277	1	fru
LMD38_RS08315	188.084	0.239226	0.414427	0.512364	0.677148	fru
LMD38_RS08320	267.132	1.73816	0.435906	2.92683e-06	5.61414e-05	fru
LMD38_RS08325	2.80961	0.130177	0.911317	0.67425	1	fru
LMD38_RS08330	25.8303	-0.466646	0.676914	0.3015	1	fru
LMD38_RS08335	127.478	-0.337862	0.46173	0.389784	0.574419	fru
LMD38_RS08340	2.04996	-0.130884	0.987704	0.48	1	fru
LMD38_RS08345	21.82	-0.883331	0.83373	0.0557735	1	fru
LMD38_RS08350	32.7749	-0.206767	0.618687	0.642904	0.762322	fru
LMD38_RS08355	42.3189	-0.0507075	0.705437	0.908558	0.948171	fru
LMD38_RS08360	43.674	-0.0144859	0.698058	0.973903	0.986785	fru
LMD38_RS08365	11.2392	-0.193086	0.723496	0.660003	1	fru
LMD38_RS08370	74.7725	-0.515871	0.723878	0.251151	0.446637	fru
LMD38_RS08375	103.933	-0.33645	0.435708	0.373622	0.561581	fru
LMD38_RS08380	64.7163	-0.143221	0.633528	0.748637	0.841258	fru
LMD38_RS08385	107.884	-0.682108	0.470826	0.0862638	0.228461	fru
LMD38_RS08390	113.889	-0.169599	0.370387	0.613223	0.741198	fru
LMD38_RS08395	87.3771	-1.2916	0.530494	0.00238336	0.0153892	fru
LMD38_RS08400	39.4066	0.0923223	0.684129	0.835719	0.898798	fru
LMD38_RS08405	719.176	0.667585	0.34635	0.035619	0.124131	fru
LMD38_RS08410	62.374	0.199208	0.599928	0.653122	0.769745	fru
LMD38_RS08415	19.1996	-0.262348	0.824134	0.510177	1	fru
LMD38_RS08420	30.536	-0.354224	0.736611	0.42116	0.602292	fru
LMD38_RS08425	13.8443	-0.261887	0.82648	0.509354	1	fru
LMD38_RS08430	236.262	0.273646	0.315212	0.35183	0.543129	fru
LMD38_RS08435	115.524	-0.555547	0.334988	0.0723903	0.203813	fru
LMD38_RS08440	110.339	-0.315033	0.691519	0.481214	0.651895	fru
LMD38_RS08445	83.1095	-0.882092	0.551785	0.041951	0.139952	fru
LMD38_RS08450	83.2173	-0.504739	0.564646	0.247337	0.443938	fru
LMD38_RS08455	27.595	-0.194651	0.759823	0.648628	0.765911	fru
LMD38_RS08460	93.3369	-0.508983	0.410215	0.160127	0.342346	fru
LMD38_RS08465	25.0689	-1.2481	0.664041	0.00798353	1	fru
LMD38_RS08470	43.8496	-0.134202	0.607544	0.762583	0.850023	fru
LMD38_RS08475	21.283	-0.535591	0.852436	0.19598	1	fru
LMD38_RS08480	38.6141	0.0440867	0.667235	0.92136	0.955191	fru
LMD38_RS08485	151.602	-4.95279	0.73126	2.34497e-14	3.52614e-12	fru
LMD38_RS08490	1498.06	-4.00571	0.428042	9.8893e-23	4.46117e-20	fru
LMD38_RS08500	140.268	0.351625	0.618374	0.431389	0.61005	fru
LMD38_RS08505	68.9791	-0.155883	0.652989	0.72762	0.826101	fru
LMD38_RS08510	55.6499	-0.107559	0.460026	0.783749	0.865276	fru
LMD38_RS08515	72.3044	-0.243333	0.737806	0.576959	0.715745	fru
LMD38_RS08520	76.162	-0.225732	0.664325	0.614288	0.741797	fru
LMD38_RS08525	158.807	0.129588	0.379681	0.704804	0.809248	fru
LMD38_RS08530	59.1773	0.107953	0.536968	0.800167	0.875562	fru
LMD38_RS08535	586.268	2.31129	0.332747	1.10903e-14	1.80106e-12	fru
LMD38_RS08540	1072.61	3.61645	0.350137	4.93207e-27	4.00484e-24	fru
LMD38_RS08545	2767.3	4.23241	0.415572	2.88201e-26	1.95016e-23	fru
LMD38_RS08550	2889.03	4.4101	0.337697	6.67099e-41	2.70842e-37	fru
LMD38_RS08555	466.084	0.377938	0.340364	0.227851	0.419917	fru
LMD38_RS08560	15.1727	-0.142864	0.740428	0.741433	1	fru
LMD38_RS08565	156.746	-0.485627	0.436478	0.199564	0.391983	fru
LMD38_RS08570	8.80646	0.948844	1.08266	0.0212197	1	fru
LMD38_RS08575	102.251	-0.774629	0.464681	0.049451	0.157963	fru
LMD38_RS08580	156.946	0.508959	0.40135	0.153503	0.333431	fru
LMD38_RS08585	56.8922	-0.809557	0.610637	0.072439	0.203813	fru
LMD38_RS28610	6.86989	-0.232825	0.889021	0.501243	1	fru
LMD38_RS08590	52.6395	-0.222183	0.58837	0.61449	0.741797	fru
LMD38_RS08595	125.31	-0.709078	0.26632	0.00513741	0.0288491	fru
LMD38_RS08600	188.304	-0.174915	0.366453	0.599079	0.731067	fru
LMD38_RS08605	631.359	0.273257	0.422117	0.460126	0.633687	fru
LMD38_RS08610	4026.97	0.436215	0.485395	0.281447	0.477507	fru
LMD38_RS08615	43.8111	0.140961	0.651264	0.752752	0.842153	fru
LMD38_RS08620	55.4322	-1.01043	0.348855	0.00153213	0.0107621	fru
LMD38_RS08625	224.349	0.0846014	0.473621	0.832103	0.896586	fru
LMD38_RS08630	927.283	0.283276	0.438976	0.456095	0.630348	fru
LMD38_RS08635	125.177	0.520008	0.356015	0.109598	0.267536	fru
LMD38_RS08640	35.7912	0.137533	0.617487	0.757557	0.846224	fru
LMD38_RS08645	88.3387	-0.306125	0.650191	0.495277	0.66342	fru
LMD38_RS08650	42.478	0.208644	0.661656	0.641287	0.760849	fru
LMD38_RS08655	45.7401	-0.717295	0.697334	0.118318	0.282571	fru
LMD38_RS08660	53.277	-0.597862	0.68151	0.188943	0.379079	fru
LMD38_RS08665	58.5917	0.0181177	0.734966	0.966664	0.982154	fru
LMD38_RS08670	10968.1	-0.49734	0.496591	0.225511	0.417496	fru
LMD38_RS08675	350.113	-0.138721	0.373962	0.68155	0.792863	fru
LMD38_RS08680	652.681	-0.0298012	0.517929	0.943335	0.970096	fru
LMD38_RS08685	105.22	-0.710889	0.59008	0.109865	0.267536	fru
LMD38_RS08690	117.592	-0.758353	0.508246	0.0681804	0.196043	fru
LMD38_RS08695	86.2702	-0.43811	0.745999	0.321422	0.516551	fru
LMD38_RS08700	77.8298	-0.387415	0.628203	0.387572	0.572405	fru
LMD38_RS08705	20.8829	-0.0818292	0.758939	0.847326	1	fru
LMD38_RS08710	79.8694	0.19228	0.676516	NA	1	fru
LMD38_RS08715	14.6564	-0.812004	0.858691	0.0708027	1	fru
LMD38_RS08720	32.0815	-0.591253	0.692948	0.193598	0.384732	fru
LMD38_RS08725	82.0204	0.815219	0.591174	0.0674788	0.194439	fru
LMD38_RS08730	65.7781	0.648247	0.560133	0.136682	0.309152	fru
LMD38_RS08735	152.706	-0.215949	0.365416	0.515351	0.679106	fru
LMD38_RS08740	84.424	0.0211972	0.594825	0.96175	0.980098	fru
LMD38_RS08745	87.6203	-0.256054	0.367354	0.442403	0.619578	fru
LMD38_RS08750	143.953	0.441112	0.34374	0.162639	0.346124	fru
LMD38_RS08755	86.9534	0.490055	0.675658	NA	1	fru
LMD38_RS08760	93.7851	-0.435565	0.599519	0.32713	0.520992	fru
LMD38_RS28695	4.32463	-0.087542	0.897508	0.785738	1	fru
LMD38_RS08765	81.5104	-0.509122	0.575142	0.246479	0.443105	fru
LMD38_RS08770	206.803	-0.784516	0.35455	0.0153448	0.0662062	fru
LMD38_RS08775	125.104	-0.269163	0.673219	0.547992	0.699858	fru
LMD38_RS08780	225.463	-0.729587	0.451105	0.0592904	0.177521	fru
LMD38_RS08785	592.251	-0.202949	0.552802	0.638366	0.758887	fru
LMD38_RS08790	35.2167	-0.283043	0.665286	0.528049	0.687141	fru
LMD38_RS08795	96.1584	-0.401288	0.442694	0.293784	0.488553	fru
LMD38_RS08800	33.8959	-0.361759	0.640259	0.420538	0.602239	fru
LMD38_RS08805	46.1564	-0.808665	0.522056	0.0552405	0.16916	fru
LMD38_RS08810	10.8395	-0.102861	0.873323	0.767698	1	fru
LMD38_RS08815	33.8199	0.038471	0.617346	0.931155	0.96049	fru
LMD38_RS08820	576.687	-2.02665	0.605323	9.87354e-06	0.000155374	fru
LMD38_RS08825	427.772	-0.864973	0.349467	0.00682246	0.0355618	fru
LMD38_RS08830	1175.57	-1.49872	0.449113	8.69107e-05	0.000988396	fru
LMD38_RS08835	1111.58	-0.912551	0.436891	0.0158359	0.068108	fru
LMD38_RS08840	585.153	-0.685111	0.480074	0.088639	0.232696	fru
LMD38_RS08845	92.032	0.925315	0.49665	0.0241421	0.0945195	fru
LMD38_RS08850	8.3364	0.788327	0.999801	0.0492913	1	fru
LMD38_RS08855	0.618562	0.0102257	0.981778	0.954661	1	fru
LMD38_RS08860	178.174	0.14093	0.527754	0.739088	0.835151	fru
LMD38_RS08865	125.234	-0.117244	0.423382	0.75182	0.842153	fru
LMD38_RS08870	70.6818	-0.289792	0.5105	0.486405	0.655542	fru
LMD38_RS08875	97.2968	-0.334999	0.73155	0.447324	0.623031	fru
LMD38_RS08880	68.9847	-1.50647	0.430003	4.76836e-05	0.000604986	fru
LMD38_RS08885	71.91	-0.872417	0.438993	0.0215407	0.0862479	fru
LMD38_RS08890	77.9862	-1.01939	0.400525	0.00409156	0.023799	fru
LMD38_RS08895	68.2739	-0.279431	0.504564	0.499476	0.667058	fru
LMD38_RS08900	32.6066	0.160383	0.702191	0.717358	0.819173	fru
LMD38_RS08905	225.029	0.562627	0.470968	0.157201	0.337692	fru
LMD38_RS08910	38.9666	-0.348909	0.722563	0.431244	0.61005	fru
LMD38_RS08915	17.8429	-0.112707	0.708028	0.798448	1	fru
LMD38_RS08925	23.8597	-0.272309	0.745642	0.531101	1	fru
LMD38_RS08930	57.5345	0.111844	0.463459	0.776381	0.860056	fru
LMD38_RS08935	30.9699	-0.577041	0.759649	0.196723	0.388849	fru
LMD38_RS08940	150.857	-0.991112	0.476795	0.0132849	0.0599362	fru
LMD38_RS08945	52.913	-0.154075	0.595626	0.727602	0.826101	fru
LMD38_RS08950	149.82	-0.312963	0.720717	0.479463	0.650174	fru
LMD38_RS08955	52.1343	-0.38068	0.558571	0.380424	0.567724	fru
LMD38_RS08970	22.9719	-0.423409	0.669524	0.347634	1	fru
LMD38_RS08975	16.531	-0.527553	0.776606	0.230257	1	fru
LMD38_RS08980	82.9258	0.326987	0.641641	0.466263	0.639437	fru
LMD38_RS08985	48.3771	-0.600835	0.545162	0.162661	0.346124	fru
LMD38_RS08995	85.5918	-0.464825	0.637286	0.301859	0.497987	fru
LMD38_RS09000	7.22664	0.123892	0.878966	0.718854	1	fru
LMD38_RS09005	5.57602	-0.230231	0.855773	0.538017	1	fru
LMD38_RS09010	7.04119	-0.141057	0.879561	0.682593	1	fru
LMD38_RS09015	31.5247	-0.0478574	0.746687	0.911288	0.949328	fru
LMD38_RS09020	10.7049	-0.230348	0.896687	0.496332	1	fru
LMD38_RS09025	31890.6	0.194911	0.533511	0.646752	0.765185	fru
LMD38_RS09030	138.434	-0.611436	0.628717	0.175492	0.360575	fru
LMD38_RS09035	7.32248	-0.326105	0.916577	0.333043	1	fru
LMD38_RS09040	73.7532	-0.406562	0.530729	0.338302	0.529694	fru
LMD38_RS09045	59.3723	-0.214279	0.585241	0.626598	0.749921	fru
LMD38_RS09050	2.24263	-0.11559	0.966036	0.61024	1	fru
LMD38_RS09055	12.3355	-0.124577	0.811586	0.754393	1	fru
LMD38_RS09060	4.14038	-0.0950291	0.90827	0.759199	1	fru
LMD38_RS09065	64.047	-1.15987	0.628499	0.0116622	0.0541745	fru
LMD38_RS09070	111.192	1.06515	0.483196	0.00827499	0.0414771	fru
LMD38_RS09075	24.2907	0.131649	0.758091	0.757422	1	fru
LMD38_RS09080	149.091	0.214575	0.403539	0.549084	0.700775	fru
LMD38_RS09085	3107.02	0.759746	0.408645	0.0353611	0.123657	fru
LMD38_RS09090	236.163	1.83714	0.539824	1.72407e-05	0.00024734	fru
LMD38_RS09095	410.641	1.27738	0.328662	2.43006e-05	0.000334442	fru
LMD38_RS09100	19400.9	2.50373	0.588078	5.13189e-08	1.55488e-06	fru
LMD38_RS09105	348.016	1.34484	0.358978	3.44238e-05	0.000453769	fru
LMD38_RS09110	667.951	0.804055	0.361263	0.014376	0.0632931	fru
LMD38_RS09115	2494.17	1.00557	0.452035	0.00931988	0.0454827	fru
LMD38_RS09120	81.5296	0.813383	0.542549	0.0585679	0.176268	fru
LMD38_RS09125	9.65626	0.153953	0.76162	0.717361	1	fru
LMD38_RS09130	29.3612	-0.492931	0.508941	0.235909	0.429696	fru
LMD38_RS09135	58.074	-1.02726	0.414311	0.00476477	0.027362	fru
LMD38_RS09140	189.29	-2.85706	0.413945	5.67677e-15	9.6032e-13	fru
LMD38_RS09145	159.602	-3.06877	0.484108	3.33265e-13	3.86587e-11	fru
LMD38_RS09150	3.51896	-0.398399	0.926356	0.24729	1	fru
LMD38_RS09155	66.88	-0.379029	0.631752	0.398204	0.582597	fru
LMD38_RS09160	75.381	-0.226728	0.685422	0.611521	0.740243	fru
LMD38_RS09165	74.0712	-0.240195	0.676488	0.591367	0.726027	fru
LMD38_RS09170	105.573	-0.556669	0.436263	0.141266	0.315304	fru
LMD38_RS09175	983.537	-0.996733	0.460125	0.0108597	0.0513873	fru
LMD38_RS09180	94.9767	-1.38108	0.620189	0.00266923	0.0168539	fru
LMD38_RS09185	143.893	-0.35483	0.689632	0.428671	0.60929	fru
LMD38_RS09190	26.5407	-0.0276686	0.832319	0.942138	1	fru
LMD38_RS09195	8.57301	-0.0316127	0.844924	0.932133	1	fru
LMD38_RS09200	31.846	-0.779529	0.740309	0.091249	0.23693	fru
LMD38_RS09205	158.747	-0.695368	0.583677	0.116342	0.278344	fru
LMD38_RS09210	264.181	-1.21622	0.419182	0.000892584	0.00686343	fru
LMD38_RS09215	5.97209	-0.142192	0.826455	0.714727	1	fru
LMD38_RS09220	39.8007	-0.743307	0.789388	0.101942	0.256275	fru
LMD38_RS09225	71.6082	-0.825496	0.631484	0.0697926	0.199267	fru
LMD38_RS09230	57.7142	-0.468349	0.67456	0.299827	0.495239	fru
LMD38_RS09235	3110.8	1.44796	0.444231	0.0001359	0.00145967	fru
LMD38_RS09240	1000.53	0.971445	0.467888	0.0140684	0.0622543	fru
LMD38_RS09245	228.746	3.85347	0.610194	1.17328e-12	1.14671e-10	fru
LMD38_RS09250	169.153	3.68227	0.821858	1.18036e-08	4.13126e-07	fru
LMD38_RS09255	436.226	3.11869	0.316443	1.23102e-25	7.13993e-23	fru
LMD38_RS09260	123.306	0.861014	0.58915	0.0533727	0.165673	fru
LMD38_RS09265	112.697	1.2756	0.549322	0.00324105	0.0198173	fru
LMD38_RS09270	130.337	1.44576	0.772674	NA	1	fru
LMD38_RS09275	141.484	1.55465	0.775037	NA	1	fru
LMD38_RS09280	13.3742	2.29719	1.5371	0.000243506	1	fru
LMD38_RS09285	160.508	0.895744	0.368323	0.00721033	0.0371026	fru
LMD38_RS09290	13.3461	0.218095	0.755042	0.611803	1	fru
LMD38_RS09295	21.5072	0.666089	0.849718	0.123754	1	fru
LMD38_RS09300	30.3621	0.266104	0.679668	0.552107	0.701926	fru
LMD38_RS09305	65.0596	0.33463	0.655467	0.456459	0.630348	fru
LMD38_RS09310	78.2063	-0.215997	0.602607	0.626442	0.749921	fru
LMD38_RS09315	39.4071	-0.726103	0.648299	0.111326	0.270162	fru
LMD38_RS09320	20.787	-1.19751	0.879067	0.0148408	1	fru
LMD38_RS09325	44.8651	0.0568042	0.620481	0.898576	0.939959	fru
LMD38_RS09330	1014.47	-0.310935	0.499942	0.450153	0.625255	fru
LMD38_RS09360	154.835	-0.239644	0.328047	0.430515	0.61005	fru
LMD38_RS09365	12.8312	0.473661	0.873559	0.230141	1	fru
LMD38_RS09370	91.183	0.0021524	0.633323	0.996155	0.99783	fru
LMD38_RS09375	33.9924	0.708478	0.659678	0.120984	0.286412	fru
LMD38_RS09380	366.724	-0.376539	0.344127	0.23379	0.42641	fru
LMD38_RS09385	91.7114	-0.272899	0.5887	0.536387	0.691343	fru
LMD38_RS09390	309.562	1.17536	0.344556	0.00019121	0.00193382	fru
LMD38_RS09395	121.054	0.549522	0.452638	0.156519	0.336582	fru
LMD38_RS09400	291.528	-0.37148	0.50658	0.370409	0.559585	fru
LMD38_RS09405	13.562	0.0414574	0.785291	0.919829	1	fru
LMD38_RS09410	20.5184	-0.192907	0.718407	0.661201	1	fru
LMD38_RS09415	45.5675	-0.115055	0.646316	0.797015	0.873368	fru
LMD38_RS09420	43.9338	-0.24285	0.547151	0.572308	0.713285	fru
LMD38_RS09425	68.6444	-0.285319	0.737215	NA	1	fru
LMD38_RS09430	50.6869	0.0538656	0.738427	0.90089	0.941955	fru
LMD38_RS09435	3897.59	-0.44512	0.528048	0.2934	0.488553	fru
LMD38_RS09440	103.152	-1.10243	0.495955	0.00712009	0.0367781	fru
LMD38_RS09445	16.9151	-0.0133231	0.796422	0.973784	1	fru
LMD38_RS09450	12.316	-0.0249277	0.745671	0.95375	1	fru
LMD38_RS09455	163.907	0.426438	0.450476	0.270086	0.466487	fru
LMD38_RS09460	89.4486	-0.75285	0.568402	0.0861693	0.22836	fru
LMD38_RS09465	277.775	-0.583201	0.356943	0.073298	0.20566	fru
LMD38_RS09470	41.0994	-0.567143	0.601167	0.203436	0.396329	fru
LMD38_RS09475	45.2337	-0.0128768	0.515673	0.975445	0.987854	fru
LMD38_RS09480	130.831	0.293505	0.554651	0.497449	0.664967	fru
LMD38_RS09485	199.783	0.933286	0.30191	0.000962267	0.00730244	fru
LMD38_RS09490	5.82832	-0.179845	0.855219	0.626698	1	fru
LMD38_RS09495	40.8217	-0.677489	0.708224	0.13878	0.310781	fru
LMD38_RS09500	40.8805	-0.0663066	0.748965	0.877121	0.927373	fru
LMD38_RS09505	218.618	-0.914107	0.455918	0.0188419	0.0778209	fru
LMD38_RS09520	338.05	-1.49759	0.502531	0.000267317	0.0025417	fru
LMD38_RS09525	13.2181	-0.505173	0.822671	0.232072	1	fru
LMD38_RS09530	35.1692	-1.23313	0.568819	0.00517036	0.028954	fru
LMD38_RS09535	32.8199	0.671629	0.578435	0.127945	0.296663	fru
LMD38_RS09540	98.5452	-0.160357	0.600345	0.717483	0.819173	fru
LMD38_RS09545	44.1825	0.0763518	0.624359	0.864091	0.917659	fru
LMD38_RS09550	33.4354	-0.00694232	0.667636	0.987595	0.994579	fru
LMD38_RS09555	9.91189	0.119734	0.806392	0.765415	1	fru
LMD38_RS09560	40.4205	-0.120487	0.696574	0.785924	0.865738	fru
LMD38_RS09575	14.8461	-0.309417	0.796536	0.457714	1	fru
LMD38_RS09580	107.204	0.52937	0.441024	0.164946	0.348428	fru
LMD38_RS09585	65.7711	-1.0827	0.464055	0.0058894	0.0316283	fru
LMD38_RS09590	15.7455	-0.640561	0.821543	NA	1	fru
LMD38_RS09595	97.4411	-0.3729	0.446058	0.331715	0.523419	fru
LMD38_RS09600	96.171	-0.551914	0.492498	0.176628	0.361811	fru
LMD38_RS09605	41.9766	-0.224917	0.609536	0.613154	0.741198	fru
LMD38_RS09610	27.3246	-0.680107	0.688375	0.137361	0.309673	fru
LMD38_RS09615	56.4833	-0.622393	0.518765	0.138577	0.310669	fru
LMD38_RS09620	57.2772	-0.77068	0.605691	0.0861242	0.22836	fru
LMD38_RS09625	33.6778	-1.18503	0.725334	0.0136645	0.0610989	fru
LMD38_RS09630	716.794	0.149691	0.284135	0.577356	0.715745	fru
LMD38_RS09635	112.786	-0.364939	0.622632	0.414824	0.597229	fru
LMD38_RS09640	84.6499	-0.899334	0.616311	0.0471908	0.15218	fru
LMD38_RS09645	76.1319	-0.475205	0.524825	0.26063	0.457483	fru
LMD38_RS09650	124.303	0.402447	0.418801	0.273932	0.469088	fru
LMD38_RS09655	53.5964	0.750941	0.618417	NA	1	fru
LMD38_RS09660	195.498	-0.0442566	0.486755	0.913098	0.949342	fru
LMD38_RS09665	46.4318	-0.771994	0.505267	0.0625159	0.183471	fru
LMD38_RS09670	147.885	0.429092	0.378268	0.208263	0.400923	fru
LMD38_RS09680	54.458	-0.143338	0.615556	0.747553	0.840971	fru
LMD38_RS09685	50.1103	0.183542	0.701688	0.678959	0.790766	fru
LMD38_RS09690	63.0721	-0.93116	0.681852	0.045483	0.147965	fru
LMD38_RS09695	45.5711	-3.08268	0.664284	5.02527e-09	1.98084e-07	fru
LMD38_RS09745	7.9854	0.251119	0.7784	0.551425	1	fru
LMD38_RS09750	56.1985	-0.157046	0.461032	0.689048	0.797928	fru
LMD38_RS09755	28.7473	-0.442794	0.751863	0.314995	0.509717	fru
LMD38_RS09760	204.285	1.18686	0.400716	0.00081116	0.00634549	fru
LMD38_RS09765	29.1258	0.429887	0.676242	0.3403	0.531392	fru
LMD38_RS09770	54.678	-0.725347	0.665323	0.113124	0.272896	fru
LMD38_RS09775	110.662	-1.18883	0.437616	0.00163712	0.0113425	fru
LMD38_RS09780	40.6386	-0.435544	0.746903	0.323891	0.518201	fru
LMD38_RS09785	183.213	0.672035	0.330132	0.0277588	0.104353	fru
LMD38_RS09790	70.3605	0.413575	0.538655	0.333355	0.524984	fru
LMD38_RS09795	47.0282	0.392866	0.610815	0.378552	0.566403	fru
LMD38_RS09800	222.655	1.9614	0.379312	4.00948e-09	1.61173e-07	fru
LMD38_RS09805	465.045	2.82359	0.432911	7.83356e-14	1.0967e-11	fru
LMD38_RS09820	5.9566	-0.339362	0.879354	0.358827	1	fru
LMD38_RS09825	60.7909	0.266346	0.432679	0.479146	0.650174	fru
LMD38_RS09830	113.343	-0.965163	0.500435	0.0191831	0.078885	fru
LMD38_RS09835	858.695	1.46178	0.387317	2.08377e-05	0.000292944	fru
LMD38_RS09840	118.273	-0.106311	0.348508	0.739399	0.835174	fru
LMD38_RS09845	25.7319	2.06732	1.35612	0.000567939	1	fru
LMD38_RS09850	21.868	-0.127546	0.744919	0.767368	1	fru
LMD38_RS09855	38.962	-0.0609554	0.776122	0.883746	0.931106	fru
LMD38_RS09860	19.1358	-0.359925	0.819233	0.379481	1	fru
LMD38_RS09865	67.6186	-0.314876	0.629999	0.482004	0.652631	fru
LMD38_RS09870	5.83412	-0.0154533	0.863851	0.965212	1	fru
LMD38_RS09875	12.4507	0.0768428	0.804321	0.848179	1	fru
LMD38_RS09880	0.817156	0.00956455	0.981779	0.957585	1	fru
LMD38_RS09885	16.9665	0.265238	0.691008	0.55237	1	fru
LMD38_RS09890	27.7436	-0.18515	0.765913	0.662642	0.777776	fru
LMD38_RS09895	31.4293	-0.101053	0.728341	0.816774	0.887498	fru
LMD38_RS09900	16.4532	-0.455235	0.687068	0.312754	1	fru
LMD38_RS09905	70.5516	-0.518958	0.429467	0.165667	0.349046	fru
LMD38_RS09910	1098.17	3.68949	0.432783	1.1764e-19	3.18413e-17	fru
LMD38_RS09915	1551.33	-2.26644	0.444727	1.48781e-09	6.78707e-08	fru
LMD38_RS09920	729.063	-2.15435	0.397009	3.87471e-10	2.21568e-08	fru
LMD38_RS09925	240.268	-5.36241	0.467395	1.87151e-33	1.89958e-30	fru
LMD38_RS09930	148.429	-4.44671	0.496983	2.87441e-21	9.72509e-19	fru
LMD38_RS09940	86.4826	-1.34022	0.617769	0.00347908	0.0211453	fru
LMD38_RS09945	59.7839	-0.73443	0.541711	0.0872737	0.230835	fru
LMD38_RS09950	83.6672	-0.75439	0.65477	0.0991169	0.250882	fru
LMD38_RS09955	55.7397	-1.03472	0.720665	0.0289409	0.107306	fru
LMD38_RS09960	102.76	-0.174106	0.656751	0.697324	0.804138	fru
LMD38_RS09965	12.1902	-0.13106	0.775252	0.754228	1	fru
LMD38_RS09970	22.8298	-0.402657	0.664612	0.371392	1	fru
LMD38_RS09975	81.2721	-0.140281	0.429654	0.708016	0.811825	fru
LMD38_RS09980	213.873	1.28079	0.440683	0.000720132	0.00575538	fru
LMD38_RS09985	16.8205	-0.703408	0.802383	0.116979	1	fru
LMD38_RS09995	43.8818	0.0717848	0.70295	0.87101	0.923316	fru
LMD38_RS10000	53.2906	0.116004	0.67681	0.79485	0.872414	fru
LMD38_RS10005	4.60195	-0.45692	0.974825	0.151694	1	fru
LMD38_RS10010	18.5881	-0.179445	0.750471	0.676652	1	fru
LMD38_RS10015	82.9342	0.391121	0.666868	0.385015	0.570221	fru
LMD38_RS10020	30.6042	-0.875145	0.681955	0.0591642	0.177274	fru
LMD38_RS10025	18.6269	-0.317305	0.787707	0.451218	1	fru
LMD38_RS10030	114.252	-0.492796	0.427605	0.186731	0.375899	fru
LMD38_RS10035	94.6239	0.301481	0.410563	0.405813	0.587945	fru
LMD38_RS10040	84.5215	-0.0580374	0.526731	0.890795	0.936222	fru
LMD38_RS10045	89.4625	0.577299	0.633983	0.201045	0.393181	fru
LMD38_RS10050	56.3925	0.16552	0.595433	0.70826	0.811825	fru
LMD38_RS10055	43.28	-0.482679	0.696344	0.284684	0.48113	fru
LMD38_RS10060	159.456	0.883545	0.448393	0.0217449	0.086894	fru
LMD38_RS10065	288.057	0.458735	0.300192	0.103528	0.257868	fru
LMD38_RS10070	37.56	0.0664898	0.610411	0.881093	0.930119	fru
LMD38_RS10075	26.1042	-0.0681136	0.670319	0.878736	1	fru
LMD38_RS10080	190.919	0.572819	0.483532	0.156356	0.336582	fru
LMD38_RS10085	267.64	0.770059	0.377318	0.0235114	0.0926758	fru
LMD38_RS10090	98.1158	0.801922	0.471948	0.0439754	0.144535	fru
LMD38_RS10095	101.518	0.78154	0.431349	0.0372545	0.127748	fru
LMD38_RS10100	68.2921	0.0639031	0.69995	0.885204	0.932035	fru
LMD38_RS10105	117.829	-0.0579993	0.44368	0.879577	0.929244	fru
LMD38_RS10110	127.639	0.0769882	0.356686	0.813105	0.884804	fru
LMD38_RS10115	24.0596	-1.64335	0.750769	0.00106678	1	fru
LMD38_RS10130	40.4136	0.102681	0.695944	NA	1	fru
LMD38_RS10135	68.8057	0.314901	0.427796	0.399064	0.583016	fru
LMD38_RS10140	70.2229	-0.234088	0.583069	0.594724	0.728599	fru
LMD38_RS10145	26.0381	-0.107384	0.62586	0.809845	1	fru
LMD38_RS10150	64.8257	-0.648834	0.453416	0.0946584	0.243504	fru
LMD38_RS10155	48.6011	-0.262407	0.702938	0.555071	0.703365	fru
LMD38_RS10160	70.8475	-0.394794	0.6987	0.378605	0.566403	fru
LMD38_RS10165	63.8398	-0.802561	0.707732	0.0829388	0.22404	fru
LMD38_RS10170	31.7503	-0.276033	0.743841	0.52615	0.685616	fru
LMD38_RS10175	58.336	-0.295428	0.716091	0.504858	0.671161	fru
LMD38_RS10180	60.9489	-0.885956	0.472089	0.0260329	0.0995231	fru
LMD38_RS10185	613.466	-1.51994	0.387535	9.42635e-06	0.000148914	fru
LMD38_RS10190	59.1804	-2.06369	0.547256	1.71829e-06	3.47078e-05	fru
LMD38_RS10195	276.572	0.439155	0.4712	0.26969	0.466487	fru
LMD38_RS10200	25.1058	-0.143313	0.783037	0.729932	1	fru
LMD38_RS10205	53.062	-0.216876	0.495764	0.596648	0.730295	fru
LMD38_RS10210	74.2946	-0.935595	0.662685	0.0432909	0.142895	fru
LMD38_RS10215	38.9526	-0.991049	0.56725	0.0241689	0.0945334	fru
LMD38_RS10225	48.1906	0.262006	0.699002	0.556214	0.704136	fru
LMD38_RS10240	365.394	-0.0460813	0.510663	0.911857	0.949328	fru
LMD38_RS10245	22.2881	0.191079	0.599362	0.666313	1	fru
LMD38_RS10250	107.576	-0.110698	0.470524	0.780622	0.863341	fru
LMD38_RS10255	217.742	0.934634	0.365528	0.00478167	0.0274203	fru
LMD38_RS10265	123.936	0.048798	0.676248	0.912851	0.949328	fru
LMD38_RS10270	49.72	-0.892257	0.636378	0.0510801	0.160888	fru
LMD38_RS10275	0.564991	0	0.982183	1	1	fru
LMD38_RS10280	130.81	-1.50123	0.376981	7.94963e-06	0.000129102	fru
LMD38_RS10285	39.9776	-0.593101	0.622111	0.187562	0.37698	fru
LMD38_RS10290	11.1214	1.36304	1.18986	0.00514395	1	fru
LMD38_RS10295	73.4287	-0.739658	0.603411	0.0988721	0.250575	fru
LMD38_RS10300	91.4847	-0.461488	0.410223	0.202856	0.3958	fru
LMD38_RS10305	37.212	-0.212763	0.527496	0.615058	0.74209	fru
LMD38_RS10310	256.284	0.692081	0.322059	0.0206652	0.0835665	fru
LMD38_RS10315	99.6145	-0.114846	0.554325	0.790439	0.869896	fru
LMD38_RS10320	191.257	0.385469	0.432795	0.30581	0.499667	fru
LMD38_RS10325	141.687	0.674276	0.401759	0.0587199	0.176333	fru
LMD38_RS10330	20.8895	-0.201944	0.566585	0.643113	1	fru
LMD38_RS10335	17.5664	-0.456636	0.730826	0.305752	1	fru
LMD38_RS10340	19.1138	-0.366321	0.632715	0.414159	1	fru
LMD38_RS10345	156.137	-0.330778	0.401594	0.353947	0.544947	fru
LMD38_RS10350	139.037	-0.661775	0.306977	0.0211826	0.0850657	fru
LMD38_RS10355	89.6712	0.166305	0.393698	0.63625	0.75753	fru
LMD38_RS10360	81.5759	-0.73041	0.568472	0.0958703	0.245109	fru
LMD38_RS10365	50.5195	-0.488165	0.662134	0.280218	0.476218	fru
LMD38_RS10370	32.123	-0.94953	0.566209	0.0305647	0.111394	fru
LMD38_RS10375	8.95154	-0.227396	0.846258	0.550296	1	fru
LMD38_RS10380	38.206	-0.544014	0.689095	0.230203	0.422525	fru
LMD38_RS10385	118.889	-0.0824989	0.402604	0.817519	0.887498	fru
LMD38_RS10390	50.9777	-0.115904	0.635728	0.795394	0.872421	fru
LMD38_RS10395	130.005	1.1704	0.510789	0.00495769	0.028112	fru
LMD38_RS10400	19.0946	0.996623	0.790755	0.0357704	1	fru
LMD38_RS10405	68.0159	0.171746	0.54852	0.689881	0.798187	fru
LMD38_RS10410	48.1308	-0.00858309	0.67393	NA	1	fru
LMD38_RS10415	0.41213	0.114491	0.986791	0.531305	1	fru
LMD38_RS10420	14.5235	-0.790632	0.876155	0.0740546	1	fru
LMD38_RS10425	44.0376	-0.234266	0.695021	0.598838	0.730993	fru
LMD38_RS10430	84.1017	-0.441439	0.478715	0.271799	0.467263	fru
LMD38_RS10435	164.592	-0.241221	0.264981	0.339268	0.530596	fru
LMD38_RS10440	69.5966	0.76737	0.492743	0.0603779	0.179717	fru
LMD38_RS10445	31.302	0.0201487	0.614383	0.963882	0.981007	fru
LMD38_RS10450	126.814	-0.410699	0.523948	0.33043	0.522206	fru
LMD38_RS10455	53.5555	0.18955	0.612393	0.670215	0.783494	fru
LMD38_RS10460	7.09871	-0.0737159	0.87384	0.831388	1	fru
LMD38_RS10465	39.0947	-0.0653135	0.654881	0.883863	0.931106	fru
LMD38_RS10470	0.518812	0.0774086	0.983715	0.670702	1	fru
LMD38_RS10475	49.467	0.0568507	0.588822	0.897396	0.939027	fru
LMD38_RS10480	23.6785	-1.18478	0.552242	0.00639497	1	fru
LMD38_RS10485	64.5372	-0.536924	0.482483	0.183406	0.37083	fru
LMD38_RS10495	169.137	0.782423	0.357591	0.0163451	0.0693876	fru
LMD38_RS10500	81.0285	-0.381244	0.525846	0.367079	0.556564	fru
LMD38_RS10505	114.657	-0.69229	0.547266	0.108542	0.26595	fru
LMD38_RS10510	227.859	-0.901184	0.416784	0.0137913	0.0614627	fru
LMD38_RS10515	22.5869	-1.56997	0.881314	0.00267805	1	fru
LMD38_RS10520	79.1271	0.118535	0.594301	0.788568	0.868344	fru
LMD38_RS10525	28.173	-0.614185	0.770004	0.169984	0.354278	fru
LMD38_RS10530	64.246	-0.249931	0.728118	0.569192	0.712148	fru
LMD38_RS10535	30.3997	-0.588498	0.610548	0.188979	0.379079	fru
LMD38_RS10540	32.5947	0.0388458	0.751849	0.927598	0.957795	fru
LMD38_RS10670	6.50222	0.627971	0.987497	0.0834868	1	fru
LMD38_RS10760	14.4212	-0.135372	0.746685	0.753274	1	fru
LMD38_RS10790	17.575	0.206464	0.734319	0.636022	1	fru
LMD38_RS10795	144.706	0.0850725	0.557937	0.844322	0.903717	fru
LMD38_RS10800	65.1134	-0.47311	0.723274	0.290743	0.486368	fru
LMD38_RS10805	364.173	-0.364446	0.276695	0.164787	0.348274	fru
LMD38_RS10810	171.352	-0.0211555	0.555778	0.960993	0.979817	fru
LMD38_RS10835	43.6922	-0.41397	0.674069	0.358184	0.547731	fru
LMD38_RS10840	146.75	-1.50402	0.841129	0.00338447	0.0206133	fru
LMD38_RS10845	85.8785	0.543794	0.590354	0.219984	0.411015	fru
LMD38_RS10850	191.67	1.072	0.396427	0.00233241	0.0152	fru
LMD38_RS10855	664.274	0.414058	0.401692	0.245955	0.442834	fru
LMD38_RS10860	31.4992	0.736049	0.774231	0.106456	0.262424	fru
LMD38_RS10865	134.753	0.907896	0.546992	0.0355745	0.124131	fru
LMD38_RS10885	447.449	0.690818	0.401857	0.0528151	0.164635	fru
LMD38_RS10890	17.7502	-0.143069	0.781903	0.730727	1	fru
LMD38_RS10895	38.4661	-0.212718	0.678451	0.634083	0.755836	fru
LMD38_RS10900	54.4908	0.0228379	0.589715	0.958701	0.978217	fru
LMD38_RS10905	20.4232	0.383204	0.777509	0.372182	1	fru
LMD38_RS10910	40.0518	0.0571558	0.552824	0.894664	0.9379	fru
LMD38_RS10915	35.7657	0.0404679	0.685528	0.927509	0.957795	fru
LMD38_RS10920	46.9814	0.114169	0.691685	0.797218	0.873368	fru
LMD38_RS10925	63.2317	0.405254	0.462179	0.302582	0.498655	fru
LMD38_RS10930	58.837	-0.278352	0.717518	0.529107	0.687744	fru
LMD38_RS10935	71.5191	-0.790219	0.435174	0.036316	0.125912	fru
LMD38_RS10940	116.966	0.691178	0.674884	0.130923	0.301159	fru
LMD38_RS10945	258.098	1.40416	0.425978	0.000141042	0.00150692	fru
LMD38_RS10950	1118.27	0.310741	0.480065	0.439912	0.617478	fru
LMD38_RS10955	40.7129	-1.00677	0.585745	0.0239287	0.0938653	fru
LMD38_RS10960	46.4539	0.315367	0.531356	0.457722	0.631234	fru
LMD38_RS10970	25.8589	-0.0186159	0.668201	0.966742	1	fru
LMD38_RS10975	135.266	0.70229	0.349016	0.0280191	0.104942	fru
LMD38_RS10980	0.655352	0.0249685	0.981862	0.88984	1	fru
LMD38_RS10990	204.471	-0.175128	0.267009	0.490805	0.659367	fru
LMD38_RS10995	1.6596	0.219806	0.969628	0.373235	1	fru
LMD38_RS11010	44.2103	-0.193823	0.68865	0.663566	0.77841	fru
LMD38_RS11015	66.83	-0.259426	0.548413	0.546788	0.698759	fru
LMD38_RS11040	1.00718	0.0497788	0.982352	0.78361	1	fru
LMD38_RS11045	19.3175	-0.3168	0.768141	0.460244	1	fru
LMD38_RS11050	25.6929	0.560171	0.767866	0.207256	1	fru
LMD38_RS11055	68.3786	-0.0908456	0.747239	0.832586	0.896793	fru
LMD38_RS11060	240.693	-0.587916	0.508761	0.157481	0.337836	fru
LMD38_RS11110	195.692	-1.05667	0.402692	0.00302323	0.01879	fru
LMD38_RS11125	50.9056	0.734032	0.600077	0.100821	0.254562	fru
LMD38_RS11130	93.4638	0.614991	0.438765	0.105429	0.260682	fru
LMD38_RS11135	120.506	-0.00541141	0.327873	0.985792	0.994118	fru
LMD38_RS11140	2.22671	-0.263509	0.99053	0.247919	1	fru
LMD38_RS11160	50.7033	-0.0237222	0.496755	0.953883	0.97595	fru
LMD38_RS11165	154.225	-0.961454	0.41789	0.00869886	0.0431225	fru
LMD38_RS11170	24.1078	-0.440372	0.773692	0.310738	1	fru
LMD38_RS11175	33.5528	-0.344761	0.570661	0.430515	0.61005	fru
LMD38_RS11185	4.73037	-0.127147	0.895076	0.698138	1	fru
LMD38_RS11190	30.5968	-0.792462	0.682151	0.0857176	0.227564	fru
LMD38_RS11195	91.3038	0.212913	0.561612	0.624095	0.74864	fru
LMD38_RS11200	79.4959	-0.188327	0.545789	0.66108	0.776391	fru
LMD38_RS11205	56.5689	-0.768427	0.489775	0.0591262	0.177274	fru
LMD38_RS11210	44.7032	-0.781583	0.516585	0.0624352	0.183471	fru
LMD38_RS11215	178.021	-0.62231	0.413258	0.0875121	0.231167	fru
LMD38_RS11220	34.4022	-0.357828	0.721187	0.420154	0.602126	fru
LMD38_RS11225	5.52967	0.276046	0.902225	0.417708	1	fru
LMD38_RS11230	23.4024	-0.166411	0.708549	0.706492	1	fru
[truncated: 28,062 more rows]

## Sheet: Supplementary Table S5
Supplementary Table S5. Differentially expressed genes in B. cereus grown with different carbohydrates.
gene_id	baseMean	log2FoldChange	lfcSE	pvalue	padj	substrate
LMD38_RS00015	137.065	-1.03232	0.419078	0.00490336	0.0279209	fru
LMD38_RS00025	204.046	-1.72683	0.437296	3.59395e-06	6.54324e-05	fru
LMD38_RS00030	2157.79	1.26297	0.268022	6.55459e-07	1.52029e-05	fru
LMD38_RS00090	906.289	-2.01235	0.368964	6.62492e-10	3.28014e-08	fru
LMD38_RS00095	294.383	-0.979735	0.262492	8.80242e-05	0.000998263	fru
LMD38_RS00105	224.63	-1.06402	0.368642	0.00140007	0.00995495	fru
LMD38_RS00110	559.573	-1.60391	0.294923	5.00416e-09	1.98084e-07	fru
LMD38_RS00145	3299.14	1.18255	0.444892	0.00195421	0.0129642	fru
LMD38_RS00150	1863.1	0.906833	0.36412	0.00604687	0.0322606	fru
LMD38_RS00155	1547.41	0.936782	0.377525	0.00582768	0.0315053	fru
LMD38_RS00180	655.696	0.775524	0.300207	0.00587966	0.0316283	fru
LMD38_RS00195	50.8198	-1.54032	0.501123	0.000171038	0.00175801	fru
LMD38_RS00245	875.991	1.27869	0.33253	2.85267e-05	0.000384779	fru
LMD38_RS00255	652.452	0.915568	0.357761	0.00493831	0.0280413	fru
LMD38_RS00300	4248.73	1.60814	0.486651	6.26798e-05	0.000757381	fru
LMD38_RS00320	83.8838	-1.01919	0.412893	0.00499956	0.0282338	fru
LMD38_RS00420	310.875	-1.26616	0.45608	0.00109267	0.00815488	fru
LMD38_RS00610	710.881	0.711342	0.2596	0.00407226	0.023789	fru
LMD38_RS00700	134.755	-1.12624	0.393619	0.00129222	0.00937136	fru
LMD38_RS00710	3687.78	1.43236	0.389839	3.37452e-05	0.000446272	fru
LMD38_RS00740	803.947	-0.802055	0.324579	0.00768822	0.0389408	fru
LMD38_RS00780	40.1983	-1.21583	0.59954	0.00711619	0.0367781	fru
LMD38_RS00790	567.189	-1.11295	0.375575	0.000983133	0.00744687	fru
LMD38_RS00795	435.495	-1.99557	0.339518	6.1575e-11	4.31025e-09	fru
LMD38_RS00825	215.308	-1.45921	0.510503	0.000438662	0.00376749	fru
LMD38_RS00830	177.646	-0.865916	0.321668	0.0037245	0.0221993	fru
LMD38_RS00845	1106.3	3.97368	0.764287	4.81606e-10	2.50682e-08	fru
LMD38_RS00850	4107.93	3.07235	0.63795	2.10894e-09	9.30683e-08	fru
LMD38_RS00860	14173	3.52709	0.682778	4.89159e-10	2.51391e-08	fru
LMD38_RS00865	720.862	4.36819	0.484877	1.86257e-21	6.87456e-19	fru
LMD38_RS00880	552.24	-0.55134	0.219163	0.00932059	0.0454827	fru
LMD38_RS00990	2062.27	1.3415	0.337514	1.41109e-05	0.000212187	fru
LMD38_RS00995	201.542	1.3133	0.371777	8.40946e-05	0.000961758	fru
LMD38_RS01005	576.056	0.795644	0.321211	0.00764414	0.0388912	fru
LMD38_RS01010	1445.76	1.00757	0.315884	0.000601919	0.00491708	fru
LMD38_RS01075	195.538	-1.62949	0.331439	7.03145e-08	2.05379e-06	fru
LMD38_RS01080	119.976	-0.903865	0.315685	0.00209159	0.0137855	fru
LMD38_RS01165	1203.05	1.22913	0.265495	1.06124e-06	2.29182e-05	fru
LMD38_RS01170	1104.04	0.924328	0.34193	0.00323882	0.0198173	fru
LMD38_RS01175	317.622	1.09546	0.306825	0.000129852	0.00140212	fru
LMD38_RS01180	85.9809	2.14976	0.770567	4.24207e-05	0.000545025	fru
LMD38_RS01300	9495.86	2.32448	0.380794	3.13628e-12	2.65277e-10	fru
LMD38_RS01305	20846.5	2.48219	0.643079	3.24557e-07	8.03476e-06	fru
LMD38_RS01310	30099.4	2.92277	0.634843	5.99809e-09	2.21384e-07	fru
LMD38_RS01315	19569.7	2.10018	0.651183	1.17582e-05	0.000181514	fru
LMD38_RS01320	62688.4	2.17488	0.638228	4.72658e-06	8.20082e-05	fru
LMD38_RS01325	29069.6	1.7001	0.575004	0.000127519	0.00138429	fru
LMD38_RS01340	95.6746	1.16043	0.513854	0.00550107	0.0304551	fru
LMD38_RS01365	1395474	-2.01408	0.71051	5.66008e-05	0.000692167	fru
LMD38_RS01420	165.675	-1.20807	0.46744	0.00219087	0.0143931	fru
LMD38_RS01490	719.987	1.40838	0.383369	3.67592e-05	0.000480727	fru
LMD38_RS01500	302.564	-1.31229	0.479642	0.00104513	0.00784328	fru
LMD38_RS01525	920.742	-1.96276	0.341118	1.52477e-10	9.67274e-09	fru
LMD38_RS01545	373.39	1.3692	0.390898	7.82285e-05	0.000907451	fru
LMD38_RS01560	3520.24	-2.79487	0.495932	2.22249e-11	1.70251e-09	fru
LMD38_RS01585	155.374	-1.64297	0.403456	3.12721e-06	5.82407e-05	fru
LMD38_RS01590	157.899	-1.59249	0.452976	3.24903e-05	0.000432493	fru
LMD38_RS01595	655.329	-1.44292	0.248365	1.06693e-09	5.09615e-08	fru
LMD38_RS01610	1821.85	1.05242	0.358236	0.00122975	0.00902858	fru
LMD38_RS01655	374.112	1.02424	0.26119	3.80423e-05	0.000495037	fru
LMD38_RS01705	349.011	-1.19908	0.480237	0.00280702	0.0176144	fru
LMD38_RS01740	155.154	-1.4642	0.555047	0.000772276	0.00607643	fru
LMD38_RS01750	98.3826	-1.13924	0.46098	0.00359001	0.0216574	fru
LMD38_RS01770	657.897	-2.50967	0.48438	4.3895e-10	2.34491e-08	fru
LMD38_RS01775	117.252	-1.05082	0.354458	0.0011361	0.00846342	fru
LMD38_RS01840	9280.22	1.06733	0.483081	0.0081333	0.0408173	fru
LMD38_RS01895	843.667	1.73136	0.394744	5.53514e-07	1.30655e-05	fru
LMD38_RS01915	2740.08	2.08766	0.405545	2.45224e-09	1.0371e-07	fru
LMD38_RS01920	3398.93	1.58597	0.522789	0.000160871	0.00167043	fru
LMD38_RS01925	4748.37	1.63995	0.451453	1.75387e-05	0.00025073	fru
LMD38_RS01945	102.576	1.78342	0.613973	0.000106689	0.00118026	fru
LMD38_RS01960	3299.01	1.1852	0.412296	0.00105701	0.00791781	fru
LMD38_RS02010	512.554	0.717451	0.273977	0.00576943	0.0313154	fru
LMD38_RS02035	99.3812	-1.3518	0.448541	0.000413534	0.00363408	fru
LMD38_RS02075	1037.8	1.28777	0.40351	0.000292848	0.00272074	fru
LMD38_RS02090	92.8751	-1.26021	0.516828	0.00263662	0.0166999	fru
LMD38_RS02160	462.747	0.855488	0.254501	0.000433539	0.00375655	fru
LMD38_RS02305	96.7293	-1.11841	0.474332	0.00501263	0.0282657	fru
LMD38_RS02400	49.3298	-1.28218	0.68114	0.00698222	0.0362504	fru
LMD38_RS02405	366.982	-2.37498	0.679848	1.90427e-06	3.82738e-05	fru
LMD38_RS02505	496.087	-1.50397	0.437587	6.06861e-05	0.000737681	fru
LMD38_RS02565	120.789	-1.03404	0.425215	0.00528628	0.029388	fru
LMD38_RS02570	392.667	1.2541	0.348041	7.7263e-05	0.000898819	fru
LMD38_RS02575	554.996	1.56746	0.240272	7.87768e-12	6.27125e-10	fru
LMD38_RS02580	236.314	0.94309	0.294561	0.000653946	0.00527838	fru
LMD38_RS02585	832.341	1.73258	0.376331	2.03418e-07	5.45926e-06	fru
LMD38_RS02630	510.618	1.49166	0.335039	1.09722e-06	2.34459e-05	fru
LMD38_RS02635	465.644	1.55534	0.373241	3.00948e-06	5.69705e-05	fru
LMD38_RS02660	57.457	-1.20703	0.475323	0.00246333	0.0157746	fru
LMD38_RS02720	773.52	1.50005	0.313226	2.18049e-07	5.78613e-06	fru
LMD38_RS02770	244.137	0.869952	0.34267	0.005693	0.0311896	fru
LMD38_RS02790	551.023	-0.981738	0.337663	0.00157299	0.0109731	fru
LMD38_RS02825	738.033	-0.653361	0.259669	0.00835561	0.0417266	fru
LMD38_RS02850	306.12	0.972427	0.311852	0.000818442	0.00638192	fru
LMD38_RS02895	184.042	1.37209	0.391265	7.63594e-05	0.00089086	fru
LMD38_RS02905	428.187	1.56325	0.691583	0.00124599	0.00911482	fru
LMD38_RS03000	151.339	-1.39898	0.483639	0.000498701	0.00418332	fru
LMD38_RS03065	4046.32	-1.174	0.529855	0.00575694	0.0312934	fru
LMD38_RS03155	173.487	1.69349	0.614132	0.00023023	0.00226327	fru
LMD38_RS03180	302.86	0.671186	0.25487	0.00586003	0.0315959	fru
LMD38_RS03185	1644.26	1.78466	0.310221	3.76336e-10	2.18275e-08	fru
LMD38_RS03260	78.6256	-1.02795	0.388489	0.00305104	0.018883	fru
LMD38_RS03335	2342.07	-1.5324	0.55278	0.000418135	0.00365868	fru
LMD38_RS03355	213.845	-1.25246	0.436121	0.000871096	0.00672367	fru
LMD38_RS03430	433.982	1.25845	0.266178	6.14482e-07	1.43379e-05	fru
LMD38_RS03465	2421.74	0.88683	0.304727	0.00186384	0.0125078	fru
LMD38_RS03545	173.676	-0.938782	0.394477	0.00753711	0.0384914	fru
LMD38_RS03590	427.714	-1.05244	0.295048	0.000144097	0.00152352	fru
LMD38_RS03610	213.947	2.06736	0.578547	3.6795e-06	6.66909e-05	fru
LMD38_RS03630	2195.5	1.982	0.574079	8.02853e-06	0.000129864	fru
LMD38_RS03645	191.584	0.860868	0.346342	0.00668356	0.0351383	fru
LMD38_RS03680	164.949	-1.40087	0.562086	0.00139877	0.00995495	fru
LMD38_RS03685	941.995	-1.17911	0.551278	0.00660379	0.03482	fru
LMD38_RS03700	71.3156	-1.22266	0.688652	0.0101119	0.0487584	fru
LMD38_RS03755	5724.66	2.39017	0.552837	4.9643e-08	1.5269e-06	fru
LMD38_RS03760	10892.4	2.09844	0.593249	3.76686e-06	6.76702e-05	fru
LMD38_RS03790	13610.8	3.01959	0.761309	1.09075e-07	3.0541e-06	fru
LMD38_RS03850	908.079	1.52865	0.382782	6.84599e-06	0.000112987	fru
LMD38_RS03930	2898.95	1.3185	0.380806	0.000106273	0.00117888	fru
LMD38_RS03995	1177.06	1.00756	0.415668	0.00575767	0.0312934	fru
LMD38_RS04000	319.863	1.79059	0.444577	1.96709e-06	3.9149e-05	fru
LMD38_RS04040	4722.14	0.981887	0.442996	0.0100834	0.0486785	fru
LMD38_RS04065	1461.74	1.31003	0.335386	2.04622e-05	0.000289465	fru
LMD38_RS04080	572.392	1.06841	0.289819	8.86335e-05	0.00100237	fru
LMD38_RS04115	952.019	1.06972	0.321443	0.000329152	0.0029763	fru
LMD38_RS04165	2352.26	1.4194	0.418407	9.67026e-05	0.00108457	fru
LMD38_RS04205	88.8318	-1.15215	0.471177	0.00368127	0.0219879	fru
LMD38_RS04235	168.29	-0.847385	0.327286	0.00515391	0.0289018	fru
LMD38_RS04280	307.623	-1.23982	0.32253	3.19066e-05	0.000426122	fru
LMD38_RS04305	960.19	1.20205	0.483577	0.00285695	0.0179	fru
LMD38_RS04325	10687.4	1.14856	0.483577	0.00439586	0.0253872	fru
LMD38_RS04330	3397.66	1.08378	0.451382	0.00499684	0.0282338	fru
LMD38_RS04345	147.689	-1.23986	0.49601	0.00244165	0.0156605	fru
LMD38_RS04355	643.425	1.1111	0.385047	0.00125002	0.00912785	fru
LMD38_RS04365	949.778	0.943202	0.352636	0.00338648	0.0206133	fru
LMD38_RS04600	112.028	-1.08596	0.447836	0.00468583	0.0269851	fru
LMD38_RS04645	3981.68	1.07704	0.444814	0.00484436	0.0277016	fru
LMD38_RS04660	1558.36	1.1636	0.279843	1.05243e-05	0.000163711	fru
LMD38_RS04665	751.645	1.72097	0.456615	7.45546e-06	0.000122053	fru
LMD38_RS04690	298.285	0.760961	0.272828	0.00328828	0.0200758	fru
LMD38_RS04700	804.504	1.41376	0.331394	3.28474e-06	6.06183e-05	fru
LMD38_RS04745	966.301	1.11237	0.343477	0.000405477	0.00357878	fru
LMD38_RS04750	2148.48	1.50209	0.393449	1.51824e-05	0.000222528	fru
LMD38_RS04755	177.962	0.978559	0.379249	0.00408872	0.023799	fru
LMD38_RS04785	1760.72	1.19506	0.407251	0.000860633	0.00665556	fru
LMD38_RS04805	661.021	0.919632	0.318022	0.00186205	0.0125078	fru
LMD38_RS04900	339.923	0.874706	0.245564	0.000201671	0.00201987	fru
LMD38_RS04910	805.386	1.38413	0.283118	1.95612e-07	5.29456e-06	fru
LMD38_RS04990	1325.74	1.40125	0.373678	2.82489e-05	0.000382301	fru
LMD38_RS05005	113.816	1.54792	0.495875	0.000143333	0.0015194	fru
LMD38_RS05010	173.614	1.06949	0.285273	6.93766e-05	0.000821192	fru
LMD38_RS05015	334.18	1.60941	0.36981	1.08925e-06	2.33988e-05	fru
LMD38_RS05020	491.372	1.86771	0.374643	1.67054e-08	5.69949e-07	fru
LMD38_RS05025	2035.71	1.16332	0.415188	0.00138812	0.00990469	fru
LMD38_RS05035	1120.25	1.2235	0.281753	4.05754e-06	7.16244e-05	fru
LMD38_RS05040	143.646	1.4049	0.474304	0.000399455	0.0035333	fru
LMD38_RS05110	356.751	1.02829	0.424798	0.00551504	0.0304551	fru
LMD38_RS05130	369.335	2.24873	0.493682	2.56999e-08	8.55261e-07	fru
LMD38_RS05135	1682.63	2.29183	0.526864	5.91415e-08	1.77863e-06	fru
LMD38_RS05140	3116.89	2.5044	0.520911	3.33178e-09	1.36637e-07	fru
LMD38_RS05145	5164.31	1.17884	0.533562	0.00573903	0.0312934	fru
LMD38_RS05160	209.422	-2.14124	0.394274	4.01859e-10	2.26604e-08	fru
LMD38_RS05165	107.205	-1.34414	0.54084	0.00175478	0.0119537	fru
LMD38_RS05170	61.7492	-1.22705	0.523338	0.00365321	0.0219409	fru
LMD38_RS05215	169.808	-1.40165	0.380911	3.67742e-05	0.000480727	fru
LMD38_RS05275	1820.77	1.65822	0.513653	6.54201e-05	0.000785815	fru
LMD38_RS05280	105.968	-1.76925	0.974193	0.001287	0.00936577	fru
LMD38_RS05315	336.152	1.22249	0.299174	1.2394e-05	0.000189885	fru
LMD38_RS05320	247.366	1.22547	0.33676	7.31564e-05	0.000855951	fru
LMD38_RS05325	154.287	1.6471	0.54409	0.000128089	0.00138677	fru
LMD38_RS05335	147.678	0.942337	0.409382	0.00906421	0.0444453	fru
LMD38_RS05345	541.291	1.39005	0.323856	3.16483e-06	5.86723e-05	fru
LMD38_RS05430	3259.95	1.44585	0.391123	2.95817e-05	0.000396375	fru
LMD38_RS05435	495.074	1.24104	0.412282	0.000597993	0.00489487	fru
LMD38_RS05440	1430.67	1.20159	0.431694	0.00130921	0.00945799	fru
LMD38_RS05450	5124.87	2.68381	0.576538	5.41519e-09	2.09388e-07	fru
LMD38_RS05525	75.4034	-1.34597	0.401297	0.000141657	0.00150952	fru
LMD38_RS05555	323.79	1.51982	0.34679	1.35313e-06	2.80291e-05	fru
LMD38_RS05635	370.294	-0.953642	0.281471	0.000335124	0.00302357	fru
LMD38_RS05655	129.918	-1.20418	0.378564	0.0003876	0.00344345	fru
LMD38_RS05710	1369.23	1.01096	0.246354	1.81798e-05	0.000258983	fru
LMD38_RS05715	680.325	1.00903	0.369983	0.00253523	0.0161586	fru
LMD38_RS05725	32.3913	-1.23626	0.53489	0.00380865	0.02264	fru
LMD38_RS05735	106.176	-1.01782	0.450524	0.00834102	0.0417051	fru
LMD38_RS05800	106.057	-2.10243	0.610809	5.31806e-06	9.11027e-05	fru
LMD38_RS05820	27.6392	-2.23641	0.940909	0.000108444	0.00119607	fru
LMD38_RS05825	50.1111	-2.29443	0.7289	8.5893e-06	0.000137836	fru
LMD38_RS05930	73.0479	-1.07191	0.460841	0.006173	0.0328466	fru
LMD38_RS05935	159.709	1.3901	0.546723	0.0012926	0.00937136	fru
LMD38_RS05950	106.982	-0.98379	0.327113	0.00114564	0.00851885	fru
LMD38_RS05975	134.364	-0.867424	0.296964	0.00186262	0.0125078	fru
LMD38_RS06050	87.0424	-1.00242	0.444218	0.00873238	0.043236	fru
LMD38_RS06060	874.585	1.32965	0.429079	0.00034351	0.00309235	fru
LMD38_RS06065	7139.18	1.4195	0.510055	0.000626624	0.00507803	fru
LMD38_RS06080	1134.4	1.23453	0.373578	0.000235741	0.00230074	fru
LMD38_RS06100	2440.14	1.01847	0.403438	0.00433037	0.0250803	fru
LMD38_RS06125	381.152	-0.961167	0.399249	0.00669013	0.0351383	fru
LMD38_RS06345	7599.59	1.13306	0.529203	0.00766536	0.0389408	fru
LMD38_RS06385	198.961	-0.944608	0.342687	0.00266686	0.0168539	fru
LMD38_RS06415	321.102	1.50196	0.441623	6.91869e-05	0.000821192	fru
LMD38_RS06420	562.212	1.36309	0.281832	2.70355e-07	7.01747e-06	fru
LMD38_RS06425	183.883	1.53963	0.592922	0.000638848	0.00516678	fru
LMD38_RS06430	428.983	2.33104	0.372899	1.18625e-12	1.14671e-10	fru
LMD38_RS06435	1416.16	3.3173	0.366502	4.80947e-22	1.95264e-19	fru
LMD38_RS06450	321.61	1.25583	0.447765	0.0010435	0.00784328	fru
LMD38_RS06515	804.004	0.99649	0.45206	0.00998603	0.0483233	fru
LMD38_RS06520	344.966	1.57331	0.376096	2.61749e-06	5.10913e-05	fru
LMD38_RS06525	467.011	1.18504	0.270913	3.85846e-06	6.87076e-05	fru
LMD38_RS06605	488.891	1.47564	0.325941	8.2385e-07	1.82778e-05	fru
LMD38_RS06630	874.936	1.35665	0.382109	6.87071e-05	0.000818038	fru
LMD38_RS06640	10926.5	1.16069	0.547255	0.00727879	0.0373602	fru
LMD38_RS06645	50333.1	1.14851	0.543335	0.00768744	0.0389408	fru
LMD38_RS06665	475.934	-2.96662	0.478097	6.98222e-13	7.26867e-11	fru
LMD38_RS06795	110.731	-1.19733	0.307256	2.88311e-05	0.000387596	fru
LMD38_RS06815	599.191	1.22242	0.365269	0.000211284	0.00209734	fru
LMD38_RS06825	269.041	1.25971	0.39027	0.000283227	0.00266181	fru
LMD38_RS06845	5274.31	1.46668	0.409451	4.18237e-05	0.000539061	fru
LMD38_RS06855	66.4931	-2.17174	0.608973	2.60431e-06	5.10797e-05	fru
LMD38_RS06910	189.93	0.869839	0.367983	0.00903639	0.0443625	fru
LMD38_RS06945	81.5561	-1.61567	0.404637	4.84712e-06	8.33869e-05	fru
LMD38_RS06955	41.7258	-1.19857	0.549031	0.0056623	0.0311082	fru
LMD38_RS07040	78.1161	-1.38734	0.418557	0.000140766	0.00150692	fru
LMD38_RS07070	170.116	-1.38206	0.331395	5.49862e-06	9.30183e-05	fru
LMD38_RS07080	84.4126	-0.989344	0.427422	0.00787067	0.0397238	fru
LMD38_RS07090	2170.08	1.32487	0.478183	0.000911148	0.00696659	fru
LMD38_RS07110	93.4975	-0.956823	0.367642	0.0040301	0.0236114	fru
LMD38_RS07155	141.215	-0.998792	0.363377	0.00243804	0.0156605	fru
LMD38_RS07225	853.405	1.04842	0.266121	3.37013e-05	0.000446272	fru
LMD38_RS07240	250.512	1.23522	0.378878	0.000273214	0.00258528	fru
LMD38_RS07250	3695.23	2.54272	0.59242	4.02442e-08	1.2765e-06	fru
LMD38_RS07255	3979.17	2.36988	0.599665	2.85744e-07	7.34253e-06	fru
LMD38_RS07260	8522.24	2.79021	0.556789	7.67037e-10	3.75201e-08	fru
LMD38_RS07265	4993.93	2.06484	0.551824	1.92225e-06	3.8445e-05	fru
LMD38_RS07285	157.534	-4.02011	0.637483	1.31011e-12	1.23698e-10	fru
LMD38_RS07290	367.084	-4.7225	0.591203	5.52693e-18	1.31996e-15	fru
LMD38_RS07300	158.256	-1.38274	0.451747	0.000321895	0.00293026	fru
LMD38_RS07395	273.007	-1.34719	0.347834	2.08524e-05	0.000292944	fru
LMD38_RS07400	234.82	-1.28081	0.391463	0.000229643	0.00226299	fru
LMD38_RS07510	765.414	2.03556	0.55683	3.02718e-06	5.69705e-05	fru
LMD38_RS07520	284.08	-2.05516	0.514143	6.99462e-07	1.58649e-05	fru
LMD38_RS07545	1246.46	0.956161	0.279224	0.000292813	0.00272074	fru
LMD38_RS07550	1096.08	0.912073	0.258176	0.000212104	0.00210035	fru
LMD38_RS07565	436.694	0.743093	0.310077	0.0102751	0.0492563	fru
LMD38_RS07575	391.163	0.7818	0.324527	0.00937009	0.0456128	fru
LMD38_RS07580	262.83	0.823706	0.32869	0.00674837	0.0352617	fru
LMD38_RS07630	261.853	0.914458	0.377508	0.00711919	0.0367781	fru
LMD38_RS07640	1020.05	0.936219	0.381178	0.0062336	0.0330829	fru
LMD38_RS07675	148.793	-1.18553	0.400885	0.000825539	0.00642086	fru
LMD38_RS07680	677.347	0.971912	0.389484	0.00520597	0.029042	fru
LMD38_RS07685	1150.41	2.14559	0.416569	1.8472e-09	8.24135e-08	fru
LMD38_RS07690	1781.21	3.12944	0.448148	4.75083e-15	8.38625e-13	fru
LMD38_RS07695	10762.6	2.52057	0.549676	1.00364e-08	3.57436e-07	fru
LMD38_RS07700	2153.79	1.78334	0.50424	1.34791e-05	0.000204964	fru
LMD38_RS07705	1847.57	3.29693	0.381464	1.66001e-20	4.81404e-18	fru
LMD38_RS07710	1549.68	2.29903	0.499542	1.70361e-08	5.7639e-07	fru
LMD38_RS07715	1316.58	2.14421	0.371169	5.29796e-11	3.84102e-09	fru
LMD38_RS07745	233.502	-1.28342	0.321163	1.53238e-05	0.000223794	fru
LMD38_RS07750	208.599	1.44816	0.383292	2.15406e-05	0.000301568	fru
LMD38_RS07780	281.737	0.700436	0.267779	0.00594821	0.0319019	fru
LMD38_RS07850	2461.3	1.35635	0.377127	5.81535e-05	0.000709018	fru
LMD38_RS07855	347.955	1.07959	0.335076	0.000462782	0.0039144	fru
LMD38_RS07885	397.192	1.34976	0.281165	3.35698e-07	8.26022e-06	fru
LMD38_RS07905	3998.21	1.06624	0.475945	0.0076246	0.0388405	fru
LMD38_RS07915	677.602	2.53776	0.522781	2.43016e-09	1.0371e-07	fru
LMD38_RS07950	3073.04	1.12283	0.414203	0.00200605	0.0132647	fru
LMD38_RS07965	2763.83	1.05969	0.390816	0.00235542	0.0153008	fru
LMD38_RS07985	2226.35	0.995527	0.427529	0.00749833	0.0383899	fru
LMD38_RS08005	2100.01	1.31644	0.511724	0.00157078	0.0109731	fru
LMD38_RS08015	639.577	1.35818	0.343224	1.43902e-05	0.000215587	fru
LMD38_RS08020	152.745	1.21383	0.332753	7.2985e-05	0.000855951	fru
LMD38_RS08055	139.95	1.46447	0.553896	0.000759958	0.00601249	fru
LMD38_RS08095	4024.68	1.00107	0.435237	0.00791616	0.039826	fru
LMD38_RS08125	3079.99	1.2321	0.455338	0.00147617	0.0104231	fru
LMD38_RS08130	3038.1	1.40015	0.504101	0.000683306	0.00548265	fru
LMD38_RS08135	1429.15	1.71605	0.352341	6.07241e-08	1.81279e-06	fru
LMD38_RS08160	144.571	-1.73728	0.454964	5.73957e-06	9.62919e-05	fru
LMD38_RS08170	350.583	-0.904748	0.358312	0.00553435	0.0304877	fru
LMD38_RS08185	1073.52	1.10221	0.431398	0.00322636	0.019787	fru
LMD38_RS08215	116.753	1.916	0.419586	1.02916e-07	2.90166e-06	fru
LMD38_RS08220	931.64	1.40182	0.353591	1.21306e-05	0.000186554	fru
LMD38_RS08255	7158.05	1.50516	0.487533	0.000188376	0.0019168	fru
LMD38_RS08260	3463.72	1.53279	0.555816	0.000433947	0.00375655	fru
LMD38_RS08265	889.905	1.02489	0.351824	0.00141105	0.0100104	fru
LMD38_RS08300	583.376	1.70487	0.375236	3.04998e-07	7.61943e-06	fru
LMD38_RS08320	267.132	1.73816	0.435906	2.92683e-06	5.61414e-05	fru
LMD38_RS08395	87.3771	-1.2916	0.530494	0.00238336	0.0153892	fru
LMD38_RS08485	151.602	-4.95279	0.73126	2.34497e-14	3.52614e-12	fru
LMD38_RS08490	1498.06	-4.00571	0.428042	9.8893e-23	4.46117e-20	fru
LMD38_RS08535	586.268	2.31129	0.332747	1.10903e-14	1.80106e-12	fru
LMD38_RS08540	1072.61	3.61645	0.350137	4.93207e-27	4.00484e-24	fru
LMD38_RS08545	2767.3	4.23241	0.415572	2.88201e-26	1.95016e-23	fru
LMD38_RS08550	2889.03	4.4101	0.337697	6.67099e-41	2.70842e-37	fru
LMD38_RS08595	125.31	-0.709078	0.26632	0.00513741	0.0288491	fru
LMD38_RS08620	55.4322	-1.01043	0.348855	0.00153213	0.0107621	fru
LMD38_RS08820	576.687	-2.02665	0.605323	9.87354e-06	0.000155374	fru
LMD38_RS08825	427.772	-0.864973	0.349467	0.00682246	0.0355618	fru
LMD38_RS08830	1175.57	-1.49872	0.449113	8.69107e-05	0.000988396	fru
LMD38_RS08880	68.9847	-1.50647	0.430003	4.76836e-05	0.000604986	fru
LMD38_RS08890	77.9862	-1.01939	0.400525	0.00409156	0.023799	fru
LMD38_RS09070	111.192	1.06515	0.483196	0.00827499	0.0414771	fru
LMD38_RS09090	236.163	1.83714	0.539824	1.72407e-05	0.00024734	fru
LMD38_RS09095	410.641	1.27738	0.328662	2.43006e-05	0.000334442	fru
LMD38_RS09100	19400.9	2.50373	0.588078	5.13189e-08	1.55488e-06	fru
LMD38_RS09105	348.016	1.34484	0.358978	3.44238e-05	0.000453769	fru
LMD38_RS09115	2494.17	1.00557	0.452035	0.00931988	0.0454827	fru
LMD38_RS09135	58.074	-1.02726	0.414311	0.00476477	0.027362	fru
LMD38_RS09140	189.29	-2.85706	0.413945	5.67677e-15	9.6032e-13	fru
LMD38_RS09145	159.602	-3.06877	0.484108	3.33265e-13	3.86587e-11	fru
LMD38_RS09180	94.9767	-1.38108	0.620189	0.00266923	0.0168539	fru
LMD38_RS09210	264.181	-1.21622	0.419182	0.000892584	0.00686343	fru
LMD38_RS09235	3110.8	1.44796	0.444231	0.0001359	0.00145967	fru
LMD38_RS09245	228.746	3.85347	0.610194	1.17328e-12	1.14671e-10	fru
LMD38_RS09250	169.153	3.68227	0.821858	1.18036e-08	4.13126e-07	fru
LMD38_RS09255	436.226	3.11869	0.316443	1.23102e-25	7.13993e-23	fru
LMD38_RS09265	112.697	1.2756	0.549322	0.00324105	0.0198173	fru
LMD38_RS09285	160.508	0.895744	0.368323	0.00721033	0.0371026	fru
LMD38_RS09390	309.562	1.17536	0.344556	0.00019121	0.00193382	fru
LMD38_RS09440	103.152	-1.10243	0.495955	0.00712009	0.0367781	fru
LMD38_RS09485	199.783	0.933286	0.30191	0.000962267	0.00730244	fru
LMD38_RS09520	338.05	-1.49759	0.502531	0.000267317	0.0025417	fru
LMD38_RS09530	35.1692	-1.23313	0.568819	0.00517036	0.028954	fru
LMD38_RS09585	65.7711	-1.0827	0.464055	0.0058894	0.0316283	fru
LMD38_RS09695	45.5711	-3.08268	0.664284	5.02527e-09	1.98084e-07	fru
LMD38_RS09760	204.285	1.18686	0.400716	0.00081116	0.00634549	fru
LMD38_RS09775	110.662	-1.18883	0.437616	0.00163712	0.0113425	fru
LMD38_RS09800	222.655	1.9614	0.379312	4.00948e-09	1.61173e-07	fru
LMD38_RS09805	465.045	2.82359	0.432911	7.83356e-14	1.0967e-11	fru
LMD38_RS09835	858.695	1.46178	0.387317	2.08377e-05	0.000292944	fru
LMD38_RS09910	1098.17	3.68949	0.432783	1.1764e-19	3.18413e-17	fru
LMD38_RS09915	1551.33	-2.26644	0.444727	1.48781e-09	6.78707e-08	fru
LMD38_RS09920	729.063	-2.15435	0.397009	3.87471e-10	2.21568e-08	fru
LMD38_RS09925	240.268	-5.36241	0.467395	1.87151e-33	1.89958e-30	fru
LMD38_RS09930	148.429	-4.44671	0.496983	2.87441e-21	9.72509e-19	fru
LMD38_RS09940	86.4826	-1.34022	0.617769	0.00347908	0.0211453	fru
LMD38_RS09980	213.873	1.28079	0.440683	0.000720132	0.00575538	fru
LMD38_RS10185	613.466	-1.51994	0.387535	9.42635e-06	0.000148914	fru
LMD38_RS10190	59.1804	-2.06369	0.547256	1.71829e-06	3.47078e-05	fru
LMD38_RS10255	217.742	0.934634	0.365528	0.00478167	0.0274203	fru
LMD38_RS10280	130.81	-1.50123	0.376981	7.94963e-06	0.000129102	fru
LMD38_RS10395	130.005	1.1704	0.510789	0.00495769	0.028112	fru
LMD38_RS10840	146.75	-1.50402	0.841129	0.00338447	0.0206133	fru
LMD38_RS10850	191.67	1.072	0.396427	0.00233241	0.0152	fru
LMD38_RS10945	258.098	1.40416	0.425978	0.000141042	0.00150692	fru
LMD38_RS11110	195.692	-1.05667	0.402692	0.00302323	0.01879	fru
LMD38_RS11165	154.225	-0.961454	0.41789	0.00869886	0.0431225	fru
LMD38_RS11335	963.222	1.73129	0.305763	8.18144e-10	3.95436e-08	fru
LMD38_RS11460	493.162	0.792188	0.311913	0.0064732	0.0342203	fru
LMD38_RS11475	31.0087	-1.27935	0.781897	0.00938095	0.0456128	fru
LMD38_RS11515	170.942	1.31737	0.393252	0.000157545	0.00164405	fru
LMD38_RS11525	332.709	1.47985	0.455784	0.00012568	0.001368	fru
LMD38_RS11530	720.969	1.33849	0.480756	0.000837561	0.0064895	fru
LMD38_RS11570	84.9846	0.958717	0.39676	0.00657635	0.0347204	fru
LMD38_RS12100	63.3005	-1.07545	0.471052	0.00674579	0.0352617	fru
LMD38_RS12110	197.258	-1.31503	0.515089	0.00165639	0.011455	fru
LMD38_RS12115	915.275	-1.76941	0.501112	1.46046e-05	0.000217197	fru
LMD38_RS12160	139.334	1.57958	0.484969	8.22068e-05	0.000948563	fru
LMD38_RS12330	142.628	1.52402	0.519736	0.000276975	0.00260909	fru
LMD38_RS12335	327.214	1.42203	0.379553	2.66446e-05	0.00036301	fru
LMD38_RS12340	543.463	1.09176	0.343939	0.000527673	0.00439007	fru
LMD38_RS12350	163.732	-1.78313	0.577238	6.09987e-05	0.000739268	fru
LMD38_RS12355	777.362	-3.79813	0.400794	2.89757e-23	1.47052e-20	fru
LMD38_RS12360	334.899	1.1563	0.383846	0.000755286	0.00598918	fru
LMD38_RS12375	1641.77	2.04017	0.454372	8.28676e-08	2.38612e-06	fru
LMD38_RS12385	459.57	1.58272	0.359615	9.7575e-07	2.12986e-05	fru
LMD38_RS12395	220.739	1.65481	0.654097	0.000481029	0.00405461	fru
LMD38_RS12405	513.235	1.21043	0.384976	0.000429121	0.00373069	fru
LMD38_RS12450	251.734	0.889003	0.367727	0.00758473	0.0386859	fru
LMD38_RS12525	97.5362	-1.0867	0.372589	0.00120996	0.00889936	fru
LMD38_RS12665	151.361	1.22508	0.468277	0.00191332	0.0127975	fru
LMD38_RS12695	113.667	1.28915	0.682751	0.00674289	0.0352617	fru
LMD38_RS12705	246.036	0.938065	0.282872	0.000444417	0.00380661	fru
LMD38_RS12805	42.3749	-1.38544	0.546769	0.00134311	0.00965139	fru
LMD38_RS12880	4231.83	-1.23353	0.500274	0.00270575	0.017058	fru
LMD38_RS12960	1839.24	1.05323	0.455362	0.0067004	0.0351468	fru
LMD38_RS13015	64.3424	-1.11707	0.489993	0.00601265	0.0321202	fru
LMD38_RS13190	499.161	1.54525	0.357274	1.58369e-06	3.21489e-05	fru
LMD38_RS13195	745.455	2.21895	0.446402	3.50678e-09	1.42375e-07	fru
LMD38_RS13200	739.696	1.76329	0.390838	2.71365e-07	7.01747e-06	fru
LMD38_RS13205	2434.12	1.40081	0.482595	0.00048136	0.00405461	fru
LMD38_RS13315	103.508	1.71936	0.534919	5.31539e-05	0.000659954	fru
LMD38_RS13390	1662.75	1.68423	0.464084	1.47319e-05	0.000218291	fru
LMD38_RS13410	44.9178	-1.02247	0.412395	0.00482259	0.027616	fru
LMD38_RS13475	29.1429	1.46164	0.749893	0.00318805	0.0196114	fru
LMD38_RS13655	94.1533	-1.15921	0.3651	0.000445772	0.00381018	fru
LMD38_RS13675	82.8024	-1.40564	0.458284	0.000290972	0.00272074	fru
LMD38_RS13715	84.8179	1.66546	0.557335	0.000133589	0.00143865	fru
LMD38_RS13785	667.65	-1.04168	0.352757	0.00120237	0.00885954	fru
LMD38_RS13885	456.645	1.81117	0.542321	2.39267e-05	0.000330416	fru
LMD38_RS14045	169.707	-1.20034	0.417898	0.00101857	0.00767234	fru
LMD38_RS14060	95.6921	-1.24979	0.601378	0.00575621	0.0312934	fru
LMD38_RS14195	77.1439	-1.15654	0.423653	0.00173303	0.0118453	fru
LMD38_RS14225	121.9	1.61574	0.478437	4.76705e-05	0.000604986	fru
LMD38_RS14230	190.55	1.35182	0.422441	0.00023142	0.00226948	fru
LMD38_RS14260	188.732	-0.906047	0.378027	0.00773432	0.039105	fru
LMD38_RS14335	217.128	-1.26959	0.388396	0.000240015	0.00233124	fru
LMD38_RS14340	209.452	-1.57818	0.41616	1.24412e-05	0.000189892	fru
LMD38_RS14345	56.3935	-1.46042	0.530365	0.000580899	0.00478388	fru
LMD38_RS14360	148.652	-1.4983	0.360861	3.98553e-06	7.06605e-05	fru
LMD38_RS14365	134.994	-1.72353	0.519064	3.68241e-05	0.000480727	fru
LMD38_RS14445	96.3912	2.04891	0.646254	1.69639e-05	0.000244337	fru
LMD38_RS14610	837.162	1.74157	0.369861	1.18868e-07	3.3055e-06	fru
LMD38_RS14665	412.289	2.04432	0.532838	1.42306e-06	2.9328e-05	fru
LMD38_RS14670	241.578	1.50358	0.361629	3.8141e-06	6.82169e-05	fru
LMD38_RS14705	80.2123	-1.122	0.448534	0.003501	0.0212467	fru
LMD38_RS14935	41.7683	-2.74598	0.895443	4.66369e-06	8.12643e-05	fru
LMD38_RS14995	84.2037	1.32513	0.535854	0.00193514	0.0128798	fru
LMD38_RS15010	319.139	1.11838	0.335387	0.000287776	0.00269832	fru
LMD38_RS15025	100.129	0.910542	0.355076	0.00491678	0.0279582	fru
LMD38_RS15035	325.519	-1.25353	0.411231	0.00051215	0.00426967	fru
LMD38_RS15045	109.544	-0.938553	0.416589	0.0102759	0.0492563	fru
LMD38_RS15050	149.373	-1.05263	0.412127	0.00368271	0.0219879	fru
LMD38_RS15060	79.2185	-1.20507	0.508828	0.00372904	0.0221993	fru
LMD38_RS15080	5670.11	1.51871	0.498137	0.000200793	0.00201987	fru
LMD38_RS15125	502.713	1.40522	0.460298	0.000304399	0.00278975	fru
LMD38_RS15250	231.385	-3.31207	0.597605	5.53123e-11	3.93979e-09	fru
LMD38_RS15255	537.864	-2.0021	0.428291	4.09333e-08	1.28829e-06	fru
LMD38_RS15300	341.17	1.35145	0.427076	0.000259721	0.0024811	fru
LMD38_RS15305	760.762	1.87566	0.332854	4.75078e-10	2.50495e-08	fru
LMD38_RS15425	19927.7	1.38745	0.566133	0.00161913	0.0112563	fru
LMD38_RS15450	137.695	-1.46505	0.360721	6.56472e-06	0.000108787	fru
LMD38_RS15485	525.611	-1.10772	0.3802	0.00115946	0.00860586	fru
LMD38_RS15520	677.316	0.966979	0.405008	0.00694149	0.0360851	fru
LMD38_RS15540	32.7083	-1.15298	0.585977	0.00987094	0.0478234	fru
LMD38_RS15575	147.788	-0.777134	0.31268	0.00769225	0.0389408	fru
LMD38_RS15590	174.967	0.798878	0.331111	0.00902808	0.0443625	fru
LMD38_RS15700	661.653	-0.696781	0.253151	0.00399737	0.0234867	fru
LMD38_RS15720	935.686	1.84285	0.44581	9.97924e-07	2.16661e-05	fru
LMD38_RS15730	265.63	1.03646	0.474433	0.00936977	0.0456128	fru
LMD38_RS15735	238.212	1.3122	0.405173	0.000232428	0.00227388	fru
LMD38_RS15740	423.751	0.650938	0.245462	0.00568735	0.0311896	fru
LMD38_RS15770	591.08	1.03052	0.319159	0.00050307	0.00421126	fru
LMD38_RS15815	60.5183	-1.39028	0.550102	0.00133993	0.0096456	fru
LMD38_RS15850	114.108	-1.11716	0.389184	0.00128722	0.00936577	fru
LMD38_RS15855	392.314	1.05152	0.350002	0.00100178	0.00755991	fru
LMD38_RS15875	77.9908	-1.53006	0.534064	0.000327363	0.00296673	fru
LMD38_RS15880	31.0971	-1.20178	0.475777	0.00259013	0.0164569	fru
LMD38_RS16065	51.0725	-1.14122	0.551205	0.00855732	0.0426291	fru
LMD38_RS16245	289.161	-2.07826	0.567154	2.48088e-06	4.8895e-05	fru
LMD38_RS16300	97.713	-1.13313	0.457107	0.00358697	0.0216574	fru
LMD38_RS16355	713.991	1.72138	0.345443	3.37104e-08	1.08622e-06	fru
LMD38_RS16440	824.971	-2.33815	0.458165	1.10144e-09	5.19982e-08	fru
LMD38_RS16455	268.533	1.02831	0.314366	0.000437555	0.00376749	fru
LMD38_RS16485	1899.83	1.53985	0.611829	0.000774362	0.00608107	fru
LMD38_RS16630	608.901	0.778198	0.303499	0.00618076	0.0328466	fru
LMD38_RS16650	7078.08	1.7499	0.602623	0.000122049	0.00133563	fru
LMD38_RS16785	97.6149	1.11074	0.417582	0.00238396	0.0153892	fru
LMD38_RS16790	491.985	1.07047	0.308986	0.000202269	0.00201987	fru
LMD38_RS16805	95.4852	1.32346	0.429099	0.000366868	0.00327522	fru
LMD38_RS16820	2032.97	1.09485	0.438419	0.00381789	0.0226584	fru
LMD38_RS16830	610.118	1.39222	0.385927	4.96141e-05	0.000623632	fru
LMD38_RS16895	220.401	-0.786241	0.279527	0.00295259	0.0184707	fru
LMD38_RS16905	445.792	-3.85622	0.481757	9.88183e-18	2.2289e-15	fru
LMD38_RS16910	262.549	-3.59242	0.460307	3.21288e-17	6.52214e-15	fru
LMD38_RS17035	126.693	-1.11961	0.345761	0.000399094	0.0035333	fru
LMD38_RS17170	1155.14	-2.92368	0.486595	2.34107e-12	2.06625e-10	fru
LMD38_RS17175	1038.93	-2.78743	0.461529	1.85608e-12	1.71265e-10	fru
LMD38_RS17235	150.585	0.900198	0.377108	0.00802215	0.0403093	fru
LMD38_RS17260	69.0507	-0.972533	0.423656	0.00857964	0.0426879	fru
LMD38_RS17265	152.08	-0.860142	0.334303	0.00527311	0.0293674	fru
LMD38_RS17275	866.034	-1.30317	0.499736	0.00150692	0.0106033	fru
LMD38_RS17350	304.587	0.834142	0.231392	0.000182051	0.00186178	fru
LMD38_RS17355	215.043	1.29598	0.424184	0.000438922	0.00376749	fru
LMD38_RS17390	126.035	0.936483	0.406571	0.00915006	0.0447832	fru
LMD38_RS17445	187.668	0.99131	0.373025	0.00321264	0.0197327	fru
LMD38_RS17500	130.187	-1.17413	0.392124	0.000761188	0.00601249	fru
LMD38_RS17635	2841.22	1.18339	0.497471	0.00390678	0.0230546	fru
LMD38_RS17640	956.192	1.20167	0.398581	0.000661436	0.00532823	fru
LMD38_RS17685	42.2378	-1.59809	0.746254	0.00138042	0.00988451	fru
LMD38_RS17740	64.8638	-0.987937	0.395655	0.00500003	0.0282338	fru
LMD38_RS17760	182.981	1.01375	0.32778	0.00081896	0.00638192	fru
LMD38_RS17780	151.114	-1.219	0.368329	0.000242161	0.00234647	fru
LMD38_RS17800	171.959	-3.13989	0.502287	6.50614e-13	6.9513e-11	fru
LMD38_RS17850	164.638	-3.75232	0.578657	3.85242e-13	4.34468e-11	fru
LMD38_RS17860	106.122	-1.62044	0.526604	0.000122724	0.00133941	fru
LMD38_RS17895	1293.19	2.05042	0.407922	5.55189e-09	2.12648e-07	fru
LMD38_RS17940	128.917	-2.4927	0.656353	4.14469e-07	9.95708e-06	fru
LMD38_RS17945	78.1741	-1.25954	0.442614	0.000918227	0.00699437	fru
LMD38_RS17995	47.7135	-1.43703	0.610272	0.001659	0.011455	fru
LMD38_RS18040	91.0066	1.39718	0.654405	0.00298752	0.0186297	fru
LMD38_RS18075	86.5043	1.28611	0.580468	0.00388919	0.0229841	fru
LMD38_RS18120	79.898	-1.20442	0.551064	0.00552092	0.0304551	fru
LMD38_RS18125	689.367	-1.15835	0.437459	0.00215618	0.0141882	fru
LMD38_RS18135	501.768	1.07074	0.346603	0.000731515	0.00582343	fru
LMD38_RS18145	676.458	1.33089	0.373566	7.13673e-05	0.0008423	fru
LMD38_RS18170	619.164	2.53273	0.603117	6.34686e-08	1.86726e-06	fru
LMD38_RS18175	536.41	1.20022	0.425008	0.00117169	0.00867375	fru
LMD38_RS18240	71.087	-1.47401	0.442877	9.83108e-05	0.00109956	fru
LMD38_RS18245	127.088	-1.41883	0.4599	0.000262598	0.00250269	fru
LMD38_RS18305	659.926	0.944251	0.387701	0.00646372	0.0342147	fru
LMD38_RS18340	913.437	-1.5637	0.40656	1.07086e-05	0.000165943	fru
LMD38_RS18350	950.81	1.07924	0.289102	7.2345e-05	0.000851364	fru
LMD38_RS18445	1166.08	1.75809	0.776139	0.00060401	0.00492426	fru
LMD38_RS18455	1295.36	2.65711	0.540117	1.41244e-09	6.51648e-08	fru
LMD38_RS18470	20545.3	-3.98472	0.7434	2.21648e-10	1.34312e-08	fru
LMD38_RS18475	26935.1	-2.35514	0.817564	1.84013e-05	0.000261221	fru
LMD38_RS18480	431.665	1.64449	0.408479	3.75758e-06	6.76702e-05	fru
LMD38_RS18505	93.4477	-1.26288	0.477299	0.00156655	0.0109659	fru
LMD38_RS18515	44.7639	-1.11444	0.476339	0.0052913	0.029388	fru
LMD38_RS18550	138968	1.90161	0.593724	2.63233e-05	0.000359841	fru
LMD38_RS18575	88.1759	-1.51895	0.68796	0.00163663	0.0113425	fru
LMD38_RS18625	599.166	1.0054	0.285336	0.000185934	0.00189671	fru
LMD38_RS18655	449.879	-0.94494	0.348338	0.00302676	0.01879	fru
LMD38_RS18665	677.618	1.44128	0.286712	8.11154e-08	2.35235e-06	fru
LMD38_RS18670	429.164	0.909563	0.310623	0.00169341	0.0116727	fru
LMD38_RS18685	184.058	1.86141	0.358659	5.95064e-09	2.21384e-07	fru
LMD38_RS18690	753.059	1.19499	0.434613	0.00146787	0.0103825	fru
LMD38_RS18695	143.797	1.59835	0.352239	4.92936e-07	1.17036e-05	fru
LMD38_RS18735	139.143	-0.76527	0.306118	0.00752749	0.0384907	fru
LMD38_RS18755	366.545	0.775526	0.255791	0.00150144	0.0105831	fru
LMD38_RS18760	617.234	1.43143	0.320314	1.25408e-06	2.63813e-05	fru
LMD38_RS18765	412.094	1.33904	0.264956	9.64708e-08	2.73896e-06	fru
LMD38_RS18785	110.353	1.40235	0.42653	0.000145991	0.00153954	fru
LMD38_RS18860	2994.58	1.50621	0.442132	6.67565e-05	0.000797152	fru
LMD38_RS18875	263.982	1.06955	0.38355	0.00184474	0.012462	fru
LMD38_RS18880	283.168	1.10303	0.320257	0.000202484	0.00201987	fru
LMD38_RS18905	312.403	1.0309	0.363351	0.00175061	0.0119453	fru
LMD38_RS18910	303.279	0.960945	0.281562	0.000302531	0.00278638	fru
LMD38_RS18915	143.139	1.47602	0.381525	1.37114e-05	0.000206945	fru
LMD38_RS18925	106.063	-1.37868	0.418186	0.000153867	0.00161421	fru
LMD38_RS18965	471.452	1.02665	0.253715	2.25199e-05	0.000313119	fru
LMD38_RS19035	104.469	1.94472	0.64497	4.11837e-05	0.000532503	fru
LMD38_RS19050	8703.86	2.04994	0.633706	1.35333e-05	0.000205019	fru
LMD38_RS19065	104.653	-1.15248	0.498822	0.00503342	0.0283435	fru
LMD38_RS19090	546.274	0.81665	0.241915	0.00043601	0.00376639	fru
LMD38_RS19100	140.313	1.85452	0.421744	2.98997e-07	7.53992e-06	fru
LMD38_RS19110	10856.4	1.60326	0.575021	0.000302659	0.00278638	fru
LMD38_RS19140	202.831	-0.929773	0.350202	0.00367877	0.0219879	fru
LMD38_RS19155	133.904	-1.15657	0.393937	0.000953822	0.00725191	fru
LMD38_RS19190	1000.67	1.75281	0.459067	5.36834e-06	9.15776e-05	fru
LMD38_RS19205	154.554	1.15548	0.457511	0.00298836	0.0186297	fru
LMD38_RS19210	176.07	2.23459	0.843659	5.13821e-05	0.000640777	fru
LMD38_RS19215	187.791	1.59843	0.386888	2.94194e-06	5.61414e-05	fru
LMD38_RS19220	101.495	1.1418	0.451941	0.00310452	0.0191555	fru
LMD38_RS19225	1160.51	2.06792	0.349027	3.18071e-11	2.34794e-09	fru
LMD38_RS19230	472.029	2.14811	0.378667	9.64015e-11	6.31275e-09	fru
LMD38_RS19235	446.113	1.86259	0.314107	8.95245e-11	5.95851e-09	fru
LMD38_RS19265	188.851	-1.08272	0.359693	0.000915223	0.0069846	fru
LMD38_RS19375	186.252	-2.75897	0.599216	6.49134e-09	2.35311e-07	fru
LMD38_RS19410	142.468	-2.0058	0.490836	5.89265e-07	1.3829e-05	fru
LMD38_RS19420	373.514	1.18037	0.442167	0.00190754	0.0127799	fru
LMD38_RS19460	102.901	-1.02185	0.405971	0.00437989	0.025331	fru
LMD38_RS19465	115.797	-1.15893	0.411993	0.0013614	0.00976555	fru
LMD38_RS19485	618.293	1.71679	0.266892	7.72399e-12	6.27125e-10	fru
LMD38_RS19490	491.639	1.15541	0.445757	0.00252061	0.016116	fru
LMD38_RS19495	81.9794	1.39522	0.845865	0.00588631	0.0316283	fru
LMD38_RS19500	1755.11	1.46614	0.381661	1.58129e-05	0.000230109	fru
LMD38_RS19515	261.58	-2.68783	0.520861	3.6762e-10	2.1631e-08	fru
LMD38_RS19570	151.191	1.15623	0.357306	0.000367051	0.00327522	fru
LMD38_RS19575	1371.93	1.13526	0.513843	0.00661677	0.0348432	fru
LMD38_RS19580	75.677	2.45288	0.51869	5.66666e-09	2.14935e-07	fru
LMD38_RS19585	211.493	1.85489	0.38678	4.58337e-08	1.43142e-06	fru
LMD38_RS19595	857.726	1.11857	0.34295	0.000369543	0.00329023	fru
LMD38_RS19615	103.395	1.27481	0.400108	0.000310032	0.00283498	fru
LMD38_RS19645	113.04	1.35241	0.450044	0.00042361	0.00369668	fru
LMD38_RS19680	154.246	-1.35856	0.452388	0.000417144	0.00365789	fru
LMD38_RS19705	275.972	-0.982684	0.427434	0.00830392	0.0415708	fru
LMD38_RS19735	90.1625	-1.61727	0.539533	0.000157926	0.00164405	fru
LMD38_RS19740	128.828	-1.71929	0.766397	0.000725771	0.00578906	fru
LMD38_RS19780	162.733	-1.79206	0.421259	7.51111e-07	1.69417e-05	fru
LMD38_RS19805	139.074	-2.14479	0.530944	4.08711e-07	9.87718e-06	fru
LMD38_RS19810	903.151	1.43381	0.335131	2.91159e-06	5.61414e-05	fru
LMD38_RS19825	1718.88	1.61952	0.480018	4.74524e-05	0.000604986	fru
LMD38_RS19830	2961.06	2.20392	0.449606	5.34104e-09	2.08506e-07	fru
LMD38_RS19835	1024.13	1.79506	0.31703	6.05855e-10	3.03675e-08	fru
LMD38_RS19845	445.743	1.48622	0.364344	5.6509e-06	9.51977e-05	fru
LMD38_RS19865	452.097	1.13229	0.392962	0.00119804	0.00884374	fru
LMD38_RS19930	677.784	-1.50801	0.344728	1.46537e-06	3.00475e-05	fru
LMD38_RS19940	217.808	-1.278	0.363916	0.000100766	0.00112085	fru
LMD38_RS19975	166.258	-2.02791	0.472993	2.21821e-07	5.84801e-06	fru
LMD38_RS20150	283.803	0.785418	0.264837	0.00183401	0.0124101	fru
LMD38_RS20175	923.127	-1.10346	0.411977	0.00231039	0.0151154	fru
LMD38_RS20240	86.4544	-1.21272	0.417126	0.000886336	0.00682832	fru
LMD38_RS20255	668.628	1.11131	0.547019	0.0101592	0.04887	fru
LMD38_RS20380	483.055	1.39253	0.344729	9.20824e-06	0.000146037	fru
LMD38_RS20480	1113.75	1.01855	0.411066	0.00488789	0.027872	fru
LMD38_RS20510	996.499	0.989573	0.407885	0.0059779	0.0319766	fru
LMD38_RS20565	113.11	-2.84994	0.481606	3.99489e-12	3.31006e-10	fru
LMD38_RS20595	898.9	2.65546	0.370499	8.41238e-16	1.55247e-13	fru
LMD38_RS20660	1759.28	-1.48982	0.427792	5.46605e-05	0.00067249	fru
LMD38_RS20665	169.548	-1.54687	0.421589	2.24016e-05	0.000312544	fru
LMD38_RS20690	39.1606	-1.89783	0.683015	0.00010014	0.00111695	fru
LMD38_RS20775	34.6479	-1.3957	0.708249	0.00396585	0.0233691	fru
LMD38_RS20780	95.3634	-1.99045	0.513992	1.53576e-06	3.13326e-05	fru
LMD38_RS20790	114.618	-0.896529	0.320508	0.00258782	0.0164569	fru
LMD38_RS20845	145.619	-0.958884	0.369363	0.00408563	0.023799	fru
LMD38_RS20850	176.819	1.57993	0.545805	0.000247126	0.00238321	fru
LMD38_RS20945	65.6466	-1.0443	0.451109	0.00683207	0.0355618	fru
LMD38_RS20960	1115.88	-1.25308	0.258956	3.60731e-07	8.8227e-06	fru
LMD38_RS21005	461.227	1.70911	0.376563	3.05903e-07	7.61943e-06	fru
LMD38_RS21020	1091.03	-2.08911	0.501326	2.91859e-07	7.45249e-06	fru
LMD38_RS21090	31.6982	-1.86466	0.836026	0.000453659	0.00385326	fru
LMD38_RS21100	478.277	1.6233	0.320102	3.28836e-08	1.06806e-06	fru
LMD38_RS21105	747.724	2.11842	0.313086	1.02144e-13	1.33775e-11	fru
LMD38_RS21115	160.561	1.0052	0.429315	0.00709804	0.0367781	fru
LMD38_RS21180	51.4176	-1.08909	0.403518	0.00226605	0.0148629	fru
LMD38_RS21195	178.256	-0.798501	0.310413	0.005853	0.0315959	fru
LMD38_RS21215	142.719	-1.60576	0.406568	6.00947e-06	0.000100405	fru
LMD38_RS21320	1901.18	-3.90996	0.49404	2.07283e-17	4.42931e-15	fru
LMD38_RS21325	578.714	-4.73857	0.377858	2.54462e-38	3.44372e-35	fru
LMD38_RS21460	278.31	1.10579	0.393689	0.00158873	0.0110639	fru
LMD38_RS21465	291.361	1.53354	0.585451	0.000618324	0.00502079	fru
LMD38_RS21480	660.821	1.23459	0.397223	0.000449343	0.0038246	fru
LMD38_RS21560	297.897	0.951156	0.292099	0.000534726	0.00443965	fru
LMD38_RS21640	149.488	-1.04856	0.448182	0.00637327	0.03378	fru
LMD38_RS21665	2673.23	1.90883	0.544059	8.78973e-06	0.000139946	fru
LMD38_RS21670	5721.48	2.34562	0.432034	1.73283e-10	1.08235e-08	fru
LMD38_RS21690	179.023	-1.18258	0.367696	0.000365959	0.00327522	fru
LMD38_RS21715	302.233	1.88473	0.509929	4.82912e-06	8.33869e-05	fru
LMD38_RS21720	288.868	1.92609	0.334897	1.87091e-10	1.15089e-08	fru
LMD38_RS21725	400.666	1.4753	0.382854	1.45972e-05	0.000217197	fru
LMD38_RS21740	1290.94	2.16843	0.381534	8.22272e-11	5.56404e-09	fru
LMD38_RS21850	135.086	-2.04277	0.465792	1.3305e-07	3.67472e-06	fru
LMD38_RS21855	469.578	-2.37804	0.368781	2.68675e-13	3.20829e-11	fru
LMD38_RS21860	315.742	-3.13075	0.498791	5.45546e-13	5.98626e-11	fru
LMD38_RS21990	2403.22	1.01012	0.417984	0.00582771	0.0315053	fru
LMD38_RS22135	126.149	-2.16863	0.415969	1.18508e-09	5.53036e-08	fru
LMD38_RS22210	366.016	0.723065	0.284607	0.00714396	0.0368545	fru
LMD38_RS22225	517.539	1.13398	0.40159	0.0014128	0.0100104	fru
LMD38_RS22230	277.347	1.52414	0.288604	1.6017e-08	5.51094e-07	fru
LMD38_RS22235	1362.06	1.64321	0.305156	5.71749e-09	2.14935e-07	fru
LMD38_RS22240	1179.74	0.748307	0.281011	0.00486847	0.0278003	fru
LMD38_RS22315	696.246	1.3824	0.398665	8.47373e-05	0.000966386	fru
LMD38_RS22320	262.734	1.28558	0.471471	0.00117288	0.00867375	fru
LMD38_RS22325	186.542	-1.4015	0.393331	5.64761e-05	0.000692167	fru
LMD38_RS22475	277.391	-1.87549	0.30686	2.74801e-11	2.06609e-09	fru
LMD38_RS22490	2433.39	1.24117	0.441103	0.00106514	0.00796406	fru
LMD38_RS22590	196.756	-1.09699	0.439774	0.0038229	0.0226584	fru
LMD38_RS22650	34.0257	-2.11398	0.846827	0.000110116	0.0012083	fru
LMD38_RS22685	24112.9	2.69482	0.612058	1.86765e-08	6.26668e-07	fru
LMD38_RS22700	3055.61	1.54638	0.342713	6.80684e-07	1.56134e-05	fru
LMD38_RS22740	180.983	-0.983845	0.380471	0.00398009	0.0234191	fru
LMD38_RS22745	178.009	-1.24585	0.42655	0.000770843	0.00607643	fru
LMD38_RS22750	425.378	-1.259	0.269078	7.77459e-07	1.74391e-05	fru
LMD38_RS22755	96.5413	-1.38435	0.444907	0.00027381	0.00258528	fru
LMD38_RS22770	168.938	-1.00974	0.367515	0.00238787	0.0153892	fru
LMD38_RS22785	1289.92	-0.978241	0.363285	0.00299176	0.0186297	fru
LMD38_RS22880	392.327	0.826035	0.292911	0.00271874	0.0171133	fru
LMD38_RS22900	75.9091	-1.51402	0.691033	0.00172316	0.0117977	fru
LMD38_RS22925	228.217	-1.03294	0.323566	0.000566064	0.00468069	fru
LMD38_RS22950	619.378	1.88902	0.270096	7.22512e-14	1.04764e-11	fru
LMD38_RS22980	109.002	-1.25882	0.351353	8.22399e-05	0.000948563	fru
LMD38_RS23000	109.138	-1.52303	0.345597	1.19871e-06	2.53477e-05	fru
LMD38_RS23005	444.066	-3.22131	0.671705	2.48248e-09	1.03906e-07	fru
LMD38_RS23015	404.674	1.0126	0.434825	0.00718215	0.0370045	fru
LMD38_RS23055	193.142	-1.85296	0.443548	7.90561e-07	1.76356e-05	fru
LMD38_RS23075	929.732	-3.41389	0.497946	2.0738e-14	3.23832e-12	fru
LMD38_RS23090	352.815	1.06244	0.237171	3.08766e-06	5.77691e-05	fru
LMD38_RS23095	7929.08	1.11749	0.492999	0.00618098	0.0328466	fru
LMD38_RS23155	1005.82	1.61282	0.383253	2.00494e-06	3.97076e-05	fru
LMD38_RS23180	666.837	1.79863	0.353457	1.37061e-08	4.75612e-07	fru
LMD38_RS23270	6081.17	-1.36847	0.548124	0.00156249	0.0109563	fru
LMD38_RS23275	509.198	-2.48723	0.381884	1.22421e-13	1.55321e-11	fru
LMD38_RS23335	326.67	0.741229	0.268363	0.00366671	0.0219879	fru
LMD38_RS23370	727.167	0.865502	0.338941	0.00551065	0.0304551	fru
LMD38_RS23385	34.6959	-1.60898	0.900685	0.00231428	0.0151154	fru
LMD38_RS23465	77.9009	-1.75625	0.441144	2.77166e-06	5.38417e-05	fru
LMD38_RS23470	1015.24	-1.69256	0.419466	2.94535e-06	5.61414e-05	fru
LMD38_RS23500	1235.58	1.10643	0.401531	0.00184813	0.0124642	fru
LMD38_RS23525	44.9413	-1.31992	0.624806	0.00417126	0.0242279	fru
LMD38_RS23585	87.5182	-2.39582	0.541728	3.04132e-08	9.95788e-07	fru
LMD38_RS23595	328.998	-0.701358	0.239603	0.00231571	0.0151154	fru
LMD38_RS23600	285764	2.35918	0.748168	7.1367e-06	0.000117308	fru
LMD38_RS23605	241204	1.95282	0.681077	6.33087e-05	0.00076271	fru
LMD38_RS23645	840.676	-0.989097	0.278113	0.000169674	0.00174842	fru
LMD38_RS23655	43.5205	-1.1242	0.541643	0.00896701	0.0441821	fru
LMD38_RS23705	361.017	0.713048	0.271684	0.00570532	0.0311896	fru
LMD38_RS23720	6265.9	1.53795	0.396126	1.02834e-05	0.000160579	fru
LMD38_RS23725	183.454	-0.985911	0.447013	0.0102317	0.0491605	fru
LMD38_RS23775	33.9126	-1.53975	0.729135	0.00181225	0.0123039	fru
LMD38_RS23815	2281.77	1.73177	0.299685	4.1502e-10	2.277e-08	fru
LMD38_RS23830	760.991	1.69743	0.319119	6.46394e-09	2.35311e-07	fru
LMD38_RS23835	2060.34	1.68176	0.383379	6.87348e-07	1.56777e-05	fru
LMD38_RS23840	1306.5	0.866054	0.300069	0.0020804	0.013734	fru
LMD38_RS23870	340.481	-1.41797	0.29034	1.80483e-07	4.91787e-06	fru
LMD38_RS23875	227.823	-0.806771	0.254537	0.00090869	0.00696091	fru
LMD38_RS23915	87.037	2.90746	0.605697	2.24205e-09	9.78787e-08	fru
LMD38_RS23940	266.348	0.927327	0.310954	0.00138337	0.00988819	fru
LMD38_RS23980	847.13	0.692703	0.286657	0.0104479	0.0499631	fru
LMD38_RS23995	255.008	-1.36742	0.411791	0.000147641	0.00155291	fru
LMD38_RS24010	242.412	-1.34459	0.259937	5.09622e-08	1.55488e-06	fru
LMD38_RS24025	105.875	-1.02173	0.465103	0.00950021	0.0461374	fru
LMD38_RS24150	105.382	-1.62554	0.420571	7.72991e-06	0.000126038	fru
LMD38_RS24205	136.502	-0.992804	0.409619	0.0059684	0.031968	fru
LMD38_RS24235	851.577	1.0493	0.246458	8.66642e-06	0.000138526	fru
LMD38_RS24370	1468.2	1.16018	0.301703	3.87723e-05	0.000502925	fru
LMD38_RS24375	1806.11	0.983714	0.305615	0.000571881	0.00471918	fru
LMD38_RS24550	88.2216	-1.10953	0.520127	0.00839707	0.0418822	fru
LMD38_RS24615	261.751	-1.56788	0.360208	1.28384e-06	2.6868e-05	fru
LMD38_RS24620	147.01	-1.42511	0.568447	0.00123299	0.00903598	fru
LMD38_RS24645	163.439	-1.15947	0.365456	0.000448971	0.0038246	fru
LMD38_RS24785	315.805	-1.34971	0.422656	0.000238093	0.00231812	fru
LMD38_RS24800	67.4135	-1.30374	0.602516	0.00403022	0.0236114	fru
LMD38_RS24840	323.83	-1.41509	0.277618	6.13522e-08	1.81817e-06	fru
LMD38_RS24845	230.372	-0.969607	0.274109	0.00018887	0.00191703	fru
LMD38_RS24850	432.452	-1.75098	0.393866	3.87667e-07	9.42471e-06	fru
LMD38_RS24920	368.981	-1.23558	0.372976	0.000228609	0.00225828	fru
LMD38_RS24940	95.255	-1.08792	0.430531	0.00360635	0.0217237	fru
LMD38_RS24985	1361.53	-1.35568	0.459904	0.000496337	0.00417211	fru
LMD38_RS25020	196.946	-1.45005	0.342277	3.30329e-06	6.06849e-05	fru
LMD38_RS25045	478.614	1.27425	0.345951	5.40691e-05	0.000667235	fru
LMD38_RS25050	1136.64	2.10717	0.333519	2.19082e-12	1.97661e-10	fru
LMD38_RS25060	516.529	-3.32679	0.395949	1.40028e-19	3.5532e-17	fru
LMD38_RS25065	844.562	-1.54281	0.45001	5.37329e-05	0.000665109	fru
LMD38_RS25120	2187.3	0.745649	0.282341	0.00520753	0.029042	fru
LMD38_RS25155	94.5271	-1.01727	0.408098	0.0047184	0.0271341	fru
LMD38_RS25250	53.014	-1.18802	0.424556	0.00130679	0.00945738	fru
LMD38_RS25270	506.678	1.31074	0.524761	0.00192153	0.0128102	fru
LMD38_RS25275	482.434	1.77773	0.426245	1.14657e-06	2.43722e-05	fru
LMD38_RS25300	627.705	0.74919	0.300635	0.00787626	0.0397238	fru
LMD38_RS25330	360.829	-1.46415	0.359154	6.18343e-06	0.000102888	fru
LMD38_RS25410	225.996	-1.2653	0.37889	0.000191477	0.00193382	fru
LMD38_RS25420	1593.06	0.803576	0.292832	0.00353691	0.0214326	fru
LMD38_RS25445	435.415	2.76269	0.43389	2.21639e-13	2.72684e-11	fru
LMD38_RS25450	181.499	1.45962	0.440411	0.000108707	0.00119607	fru
LMD38_RS25455	588.337	1.79572	0.316297	5.53332e-10	2.80816e-08	fru
LMD38_RS25460	816.919	2.29367	0.344874	9.54343e-14	1.29154e-11	fru
LMD38_RS25465	6262.96	2.0322	0.609703	1.02041e-05	0.000159957	fru
LMD38_RS25470	16083.7	2.91726	0.569556	4.10991e-10	2.277e-08	fru
LMD38_RS25475	1715.83	2.14197	0.474376	4.73157e-08	1.46643e-06	fru
LMD38_RS25480	2283.42	2.02292	0.631435	1.66057e-05	0.000240782	fru
LMD38_RS25485	1780.54	1.76422	0.547341	4.28796e-05	0.000549183	fru
LMD38_RS25490	614.775	4.34623	0.494412	1.31696e-20	4.11297e-18	fru
LMD38_RS25495	8297.95	3.0294	0.558379	8.03555e-11	5.52955e-09	fru
LMD38_RS25500	3248.99	4.221	0.329193	1.9196e-39	3.89678e-36	fru
LMD38_RS25505	13926.6	3.40359	0.454023	2.16934e-16	4.19406e-14	fru
LMD38_RS25510	3573.24	2.24695	0.552814	2.53412e-07	6.63775e-06	fru
LMD38_RS25515	4740.66	1.87475	0.504028	4.60755e-06	8.06322e-05	fru
LMD38_RS25520	12875.4	1.59617	0.543869	0.000206483	0.00205471	fru
LMD38_RS25525	4366.44	1.64971	0.525835	9.04548e-05	0.00102013	fru
LMD38_RS25530	7392.99	1.59104	0.530809	0.000175599	0.00180033	fru
LMD38_RS25535	2913.99	1.53515	0.519762	0.000249339	0.00239318	fru
LMD38_RS25545	4379.69	1.74912	0.493037	1.50035e-05	0.000220703	fru
LMD38_RS25550	2557.76	1.7699	0.55836	4.98093e-05	0.000624154	fru
LMD38_RS25555	2471.36	1.83939	0.534456	1.49231e-05	0.000220319	fru
LMD38_RS25560	2038.48	1.72143	0.531887	4.90304e-05	0.000620135	fru
LMD38_RS25565	3379.59	1.43343	0.498754	0.000462786	0.0039144	fru
LMD38_RS25570	5297.68	1.54424	0.542506	0.000325866	0.00295977	fru
LMD38_RS25575	5529.19	1.31952	0.520542	0.00170381	0.0116874	fru
LMD38_RS25585	2922.14	1.08355	0.524891	0.0104392	0.0499631	fru
LMD38_RS25590	7991.02	1.33068	0.507152	0.00131362	0.00947299	fru
LMD38_RS25595	13078.1	1.13952	0.55942	0.00915519	0.0447832	fru
LMD38_RS25625	2911.73	2.33495	0.500469	1.10197e-08	3.89043e-07	fru
LMD38_RS25650	351.265	1.11247	0.343646	0.000407128	0.00358555	fru
LMD38_RS25660	6927.03	1.7946	0.491021	8.32805e-06	0.000134174	fru
LMD38_RS25665	3468.48	1.82711	0.549372	2.34815e-05	0.000325375	fru
LMD38_RS25670	2804.33	2.06544	0.483775	2.04386e-07	5.45926e-06	fru
LMD38_RS25680	54.003	-1.01784	0.422174	0.00579953	0.0314367	fru
LMD38_RS25690	645.97	-0.919508	0.31479	0.00170084	0.0116874	fru
LMD38_RS25695	1371.64	1.04987	0.431874	0.00508592	0.0285995	fru
LMD38_RS25705	584.945	1.3243	0.444991	0.000508366	0.00424684	fru
LMD38_RS25730	790.412	0.936951	0.293804	0.000690161	0.00552673	fru
LMD38_RS25745	446.317	-0.7424	0.209184	0.00025403	0.00243246	fru
LMD38_RS25760	1360.94	-1.44875	0.476241	0.000267949	0.00254176	fru
LMD38_RS25765	910.202	-2.04107	0.518975	9.70786e-07	2.12986e-05	fru
LMD38_RS25805	334.52	-1.4051	0.535296	0.000998504	0.00754921	fru
LMD38_RS25845	2112.15	1.26263	0.392687	0.000292473	0.00272074	fru
LMD38_RS25855	53.4898	1.79002	0.708948	0.000293649	0.00272195	fru
LMD38_RS25860	339.372	0.841601	0.324921	0.00518988	0.0290233	fru
LMD38_RS25870	372.971	0.90907	0.285573	0.000738862	0.00587041	fru
LMD38_RS25875	444.147	1.38234	0.292319	4.32149e-07	1.03207e-05	fru
LMD38_RS25890	3979.62	1.38006	0.49155	0.000677464	0.00544654	fru
LMD38_RS25905	8148.43	1.01797	0.383352	0.00304243	0.0188584	fru
LMD38_RS25950	275.125	1.66319	0.473578	2.45535e-05	0.000336781	fru
LMD38_RS25960	1219.84	0.721108	0.29163	0.00863951	0.0429332	fru
LMD38_RS25970	375.622	0.82333	0.341174	0.00865357	0.0429505	fru
LMD38_RS25975	2576.31	1.04064	0.253393	1.69712e-05	0.000244337	fru
LMD38_RS25990	1042.37	1.23832	0.388972	0.000348662	0.00313178	fru
LMD38_RS26020	87.1018	-1.36422	0.600831	0.00260704	0.0165384	fru
LMD38_RS26055	820.478	-1.31959	0.393479	0.000154465	0.00161631	fru
LMD38_RS26085	224.438	-1.00856	0.326281	0.000832374	0.00646164	fru
LMD38_RS26140	1873.7	1.30219	0.395593	0.000201154	0.00201987	fru
LMD38_RS26155	977294	-1.53669	0.582533	0.000583009	0.00479154	fru
LMD38_RS26165	40.6986	-1.82378	0.745911	0.000317297	0.00289488	fru
LMD38_RS26180	437.72	1.23781	0.477142	0.00194292	0.0129104	fru
LMD38_RS26195	4439.05	1.29091	0.504061	0.00176709	0.0120174	fru
LMD38_RS26200	2526.76	1.26997	0.426874	0.000608407	0.00495017	fru
LMD38_RS26205	851.367	0.705161	0.285014	0.00879299	0.043483	fru
LMD38_RS26250	2496.74	1.41374	0.394039	4.95119e-05	0.000623632	fru
LMD38_RS26280	106.748	-0.870694	0.31604	0.00307088	0.0189768	fru
LMD38_RS26305	438.498	1.62754	0.334659	9.23128e-08	2.63937e-06	fru
LMD38_RS26315	1136.01	1.03772	0.292897	0.000162398	0.0016777	fru
LMD38_RS26375	3340.19	1.95034	0.349344	4.38069e-10	2.34491e-08	fru
LMD38_RS26410	1731.69	1.27732	0.291866	3.03094e-06	5.69705e-05	fru
LMD38_RS26415	1308.54	1.25545	0.294976	5.48163e-06	9.30183e-05	fru
LMD38_RS26420	573.018	1.2518	0.33714	5.14515e-05	0.000640777	fru
LMD38_RS26425	353.263	1.58243	0.352567	6.59042e-07	1.52029e-05	fru
LMD38_RS26430	734.833	1.27687	0.240177	2.8258e-08	9.32745e-07	fru
LMD38_RS26525	236.433	-0.922504	0.316074	0.00170417	0.0116874	fru
LMD38_RS26540	852.768	-0.926843	0.330124	0.00237252	0.0153873	fru
LMD38_RS26595	198.157	-0.97873	0.376112	0.00384908	0.0227803	fru
LMD38_RS26625	152.581	0.895123	0.380933	0.00890701	0.0439933	fru
LMD38_RS26640	593.595	-1.3761	0.324654	4.17795e-06	7.34306e-05	fru
LMD38_RS26645	582.837	0.824616	0.318196	0.00531903	0.0295017	fru
LMD38_RS26710	134.042	-1.10661	0.431751	0.00312117	0.0192291	fru
LMD38_RS26745	137.273	-1.07305	0.320483	0.000304329	0.00278975	fru
LMD38_RS26775	266.322	-1.07258	0.429727	0.00406754	0.023789	fru
LMD38_RS26790	540.757	0.840359	0.287276	0.00192007	0.0128102	fru
LMD38_RS26830	772.332	1.00851	0.280772	0.000143207	0.0015194	fru
LMD38_RS26860	394.138	0.989628	0.286134	0.000243182	0.00235076	fru
LMD38_RS26865	63.7871	-1.13617	0.535868	0.00790809	0.039826	fru
LMD38_RS26905	250.584	-1.20224	0.332002	8.31448e-05	0.000956282	fru
LMD38_RS26915	546.11	0.878788	0.325322	0.00354402	0.0214437	fru
LMD38_RS26925	147.639	-1.19485	0.463998	0.00233825	0.0152136	fru
LMD38_RS26935	179.595	-1.04998	0.487478	0.00963223	0.0467226	fru
LMD38_RS26940	219.893	-1.12454	0.359306	0.00056435	0.00467604	fru
LMD38_RS26955	2029.1	0.918738	0.367025	0.00570785	0.0311896	fru
LMD38_RS27025	1207.39	0.827299	0.334104	0.00727158	0.0373602	fru
LMD38_RS27245	311.136	-0.881068	0.373981	0.00902033	0.0443625	fru
LMD38_RS27430	80.2673	-1.33677	0.380626	8.40886e-05	0.000961758	fru
LMD38_RS27440	241.025	-3.09502	0.513219	2.42179e-12	2.09202e-10	fru
LMD38_RS27445	1250.45	-2.58589	0.494445	2.87057e-10	1.7139e-08	fru
LMD38_RS27450	188.147	-1.3288	0.414957	0.000248022	0.00238618	fru
LMD38_RS27485	82.4684	-1.14036	0.417834	0.00181693	0.0123151	fru
LMD38_RS27610	175.156	-1.23153	0.360425	0.000161318	0.00167079	fru
LMD38_RS28675	70.4012	-2.49067	0.50221	1.54096e-09	6.95146e-08	fru
LMD38_RS27660	148.75	-1.11411	0.372676	0.000904258	0.00694005	fru
LMD38_RS27665	267.936	-2.64234	0.576866	8.32286e-09	2.99034e-07	fru
LMD38_RS27670	239.817	-1.70836	0.375681	2.94941e-07	7.48412e-06	fru
LMD38_RS27675	62.0822	-1.4026	0.633747	0.00252621	0.0161264	fru
LMD38_RS27720	188.628	-1.9151	0.399389	3.44078e-08	1.09997e-06	fru
LMD38_RS27735	2948.2	1.02751	0.446292	0.00735786	0.0377183	fru
LMD38_RS27740	394.407	-1.88813	0.35408	2.42428e-09	1.0371e-07	fru
LMD38_RS27745	58.6033	-2.0751	0.528528	8.69571e-07	1.91873e-05	fru
LMD38_RS27785	465.832	0.856271	0.294385	0.00197147	0.0130574	fru
LMD38_RS27820	69.2598	-1.77593	0.578375	6.65337e-05	0.000796834	fru
LMD38_RS27830	82.0703	-1.0042	0.425799	0.00682817	0.0355618	fru
LMD38_RS27840	1416.37	-3.60518	0.662861	1.29451e-10	8.34237e-09	fru
LMD38_RS27855	90.1727	-0.993267	0.360055	0.00239669	0.0154208	fru
LMD38_RS27860	126.196	-1.13307	0.471792	0.00432857	0.0250803	fru
LMD38_RS27865	136.399	-0.965373	0.347273	0.00238798	0.0153892	fru
LMD38_RS27870	53.0424	-1.34071	0.625295	0.00364078	0.0218986	fru
LMD38_RS27880	122.423	-1.32981	0.473323	0.000804971	0.00630923	fru
LMD38_RS27890	409.529	-0.811116	0.343649	0.0101392	0.0488319	fru
LMD38_RS27925	325.251	-1.05092	0.424387	0.00452493	0.0260955	fru
LMD38_RS27930	43.6224	-1.21015	0.556893	0.00554921	0.0305282	fru
LMD38_RS27935	491.407	-1.67485	0.416759	3.39828e-06	6.21487e-05	fru
LMD38_RS27960	1768	1.58535	0.366047	1.31769e-06	2.74349e-05	fru
LMD38_RS27975	312.589	-0.859961	0.307522	0.00276402	0.0173714	fru
LMD38_RS27990	112.301	-0.952216	0.414251	0.00893166	0.0440614	fru
LMD38_RS27995	638.986	-2.56429	0.448039	1.66416e-11	1.29932e-09	fru
LMD38_RS28000	1364.62	-2.41843	0.387932	9.65605e-13	9.80089e-11	fru
LMD38_RS28005	798.993	-1.92094	0.36529	3.06892e-09	1.27141e-07	fru
LMD38_RS28010	92.2468	-2.27565	0.547577	1.53004e-07	4.19728e-06	fru
LMD38_RS28095	382.497	0.680243	0.278931	0.00999969	0.0483319	fru
LMD38_RS28150	261.858	-1.08427	0.296036	9.39188e-05	0.00105626	fru
LMD38_RS28155	140.724	-1.42609	0.489347	0.000424299	0.00369668	fru
LMD38_RS28340	117.336	-0.947383	0.276507	0.000295376	0.00273172	fru
LMD38_RS28365	131.248	-1.27476	0.427487	0.000586931	0.00481402	fru
LMD38_RS28380	303.691	-1.12547	0.285166	2.78743e-05	0.000378494	fru
LMD38_RS00265	273.572	-0.917825	0.480869	0.00156164	0.0384318	gal
LMD38_RS00280	110.472	-1.20709	0.575062	0.000366486	0.0135445	gal
LMD38_RS00550	691.459	-0.940391	0.319848	0.000135761	0.006245	gal
LMD38_RS00795	435.495	-0.843826	0.330094	0.000615049	0.0201818	gal
LMD38_RS00835	7339.56	-1.09609	0.583318	0.000847796	0.0251775	gal
LMD38_RS00845	1106.3	2.49678	0.829567	8.4301e-06	0.000691549	gal
LMD38_RS01025	17.5554	-2.16545	1.80441	8.84874e-05	0.00439934	gal
LMD38_RS01180	85.9809	1.23126	0.839766	0.00131409	0.0342219	gal
LMD38_RS01185	1404.86	-1.9946	0.501297	3.62115e-07	5.74945e-05	gal
LMD38_RS01475	590.092	-1.05652	0.582689	0.00110504	0.0302166	gal
LMD38_RS01490	719.987	1.70969	0.464151	8.02001e-07	0.000104661	gal
LMD38_RS01525	920.742	-2.69772	0.335361	6.89732e-17	1.69743e-13	gal
LMD38_RS01540	147.834	-1.06694	0.690202	0.00177634	0.0424425	gal
LMD38_RS01560	3520.24	-3.326	0.45828	5.42343e-15	8.89803e-12	gal
LMD38_RS01585	155.374	-1.32962	0.474401	3.37999e-05	0.00205387	gal
LMD38_RS01590	157.899	-1.19397	0.53264	0.000265582	0.0105419	gal
LMD38_RS01595	655.329	-0.930264	0.249334	1.14587e-05	0.000895235	gal
LMD38_RS01710	245.101	-1.43344	0.413308	2.18064e-06	0.000223606	gal
LMD38_RS01770	657.897	-1.36108	0.524079	6.10907e-05	0.00319881	gal
LMD38_RS02025	230.778	-0.836551	0.39174	0.001508	0.0374868	gal
LMD38_RS02165	638.591	-0.962115	0.421435	0.000602709	0.0200442	gal
LMD38_RS02405	366.982	-2.52949	0.672831	1.13925e-06	0.00012744	gal
LMD38_RS02435	109.158	-1.58192	0.722301	0.000141234	0.0064277	gal
LMD38_RS02465	28.7802	-1.24783	1.24591	0.00128403	0.034162	gal
LMD38_RS02630	510.618	1.14712	0.371323	2.59758e-05	0.00182647	gal
LMD38_RS02635	465.644	1.80098	0.436588	1.3786e-07	2.51314e-05	gal
LMD38_RS02640	192.772	0.863194	0.388893	0.00112178	0.0305049	gal
LMD38_RS02720	773.52	0.795502	0.315731	0.000864833	0.0254893	gal
LMD38_RS02860	64.762	-1.34167	0.627196	0.000238486	0.00978191	gal
LMD38_RS02970	55.2242	1.32849	1.05357	0.00126437	0.033822	gal
LMD38_RS03180	302.86	1.03398	0.267341	3.14458e-06	0.000303483	gal
LMD38_RS03185	1644.26	1.1452	0.331324	7.12683e-06	0.000653174	gal
LMD38_RS03215	12.7115	1.82129	1.69219	0.000182515	0.0079499	gal
LMD38_RS03350	36.448	1.18731	1.00434	0.00197373	0.0456017	gal
LMD38_RS03505	493.667	-0.809791	0.392246	0.00196351	0.0456017	gal
LMD38_RS03545	173.676	-1.13215	0.473695	0.000223084	0.0093848	gal
LMD38_RS03590	427.714	-0.719738	0.300498	0.00164263	0.0400248	gal
LMD38_RS03610	213.947	2.57348	0.577274	1.0964e-07	2.07557e-05	gal
LMD38_RS03740	420.12	-1.00779	0.413344	0.000339146	0.0127426	gal
LMD38_RS03870	44.6048	1.4285	1.05137	0.000915002	0.0263371	gal
LMD38_RS04925	40.8475	-1.1727	0.702436	0.00105137	0.029072	gal
LMD38_RS04945	1118.27	-0.699774	0.253374	0.000796418	0.0246539	gal
LMD38_RS05045	18.7633	2.0524	1.66189	0.000131828	0.0061213	gal
LMD38_RS05105	377.232	-1.72398	0.453559	4.97294e-07	7.41722e-05	gal
LMD38_RS05140	3116.89	1.25862	0.556138	0.000208399	0.00891945	gal
LMD38_RS05160	209.422	-0.791545	0.375551	0.00199195	0.0456017	gal
LMD38_RS05410	2487.88	-1.48296	0.472939	7.52813e-06	0.000661669	gal
LMD38_RS05570	241.183	-1.82957	0.504392	1.13219e-06	0.00012744	gal
LMD38_RS05575	496.331	-1.14912	0.526851	0.000357121	0.0133163	gal
LMD38_RS05580	193.51	-1.18439	0.663251	0.000802538	0.0246881	gal
LMD38_RS05800	106.057	-1.22986	0.677011	0.000669275	0.0212527	gal
LMD38_RS06280	341.706	-0.958585	0.284252	3.27554e-05	0.00205387	gal
LMD38_RS06305	1592.67	-1.65873	0.552467	1.08214e-05	0.000859079	gal
LMD38_RS06310	441.228	-2.23531	0.47136	2.54021e-08	6.77685e-06	gal
LMD38_RS06665	475.934	-2.12549	0.486127	9.57634e-08	1.88539e-05	gal
LMD38_RS06945	81.5561	-0.99307	0.437511	0.00053672	0.0186502	gal
LMD38_RS07020	386.596	-1.03293	0.413444	0.00025919	0.0104375	gal
LMD38_RS07080	84.4126	-0.904827	0.489715	0.00184431	0.0436428	gal
LMD38_RS07290	367.084	-1.41586	0.698423	0.000275723	0.0108569	gal
LMD38_RS07305	566.225	-1.22748	0.428985	3.86589e-05	0.00226523	gal
LMD38_RS07330	7.79943	0.882911	1.25342	0.00174563	0.0419123	gal
LMD38_RS07390	174.168	-0.945942	0.403975	0.000573731	0.0194372	gal
LMD38_RS07520	284.08	-1.02073	0.539109	0.00106525	0.0292915	gal
LMD38_RS07705	1847.57	1.08657	0.3944	0.000100038	0.00482734	gal
LMD38_RS08160	144.571	-1.06304	0.503683	0.000572612	0.0194372	gal
LMD38_RS08300	583.376	0.787771	0.378022	0.00211867	0.0480014	gal
LMD38_RS08320	267.132	0.901165	0.457424	0.0015014	0.0374868	gal
LMD38_RS08485	151.602	-3.26022	0.729244	3.95186e-08	8.45699e-06	gal
LMD38_RS08490	1498.06	-3.01597	0.420678	2.82407e-14	2.78001e-11	gal
LMD38_RS08525	158.807	-1.06447	0.45346	0.000326522	0.0123626	gal
LMD38_RS08540	1072.61	-1.04562	0.366794	9.41675e-05	0.00458903	gal
LMD38_RS08670	10968.1	-1.06567	0.646507	0.00147988	0.0371631	gal
LMD38_RS08770	206.803	-1.16983	0.418656	6.04632e-05	0.00319881	gal
LMD38_RS09140	189.29	-1.80651	0.439628	1.49353e-07	2.6254e-05	gal
LMD38_RS09145	159.602	-2.2797	0.477171	2.37116e-08	6.77685e-06	gal
LMD38_RS09245	228.746	1.76526	0.723411	5.99207e-05	0.00319881	gal
LMD38_RS09520	338.05	-1.35437	0.63145	0.000228889	0.00946717	gal
LMD38_RS09845	25.7319	4.74842	1.89501	5.31954e-07	7.70082e-05	gal
LMD38_RS09915	1551.33	-1.28802	0.482156	5.8221e-05	0.00314905	gal
LMD38_RS09920	729.063	-1.31775	0.434314	1.56512e-05	0.0011672	gal
LMD38_RS09925	240.268	-1.11516	0.48874	0.000313685	0.0120622	gal
LMD38_RS10185	613.466	-1.77006	0.461827	4.59532e-07	7.06817e-05	gal
LMD38_RS10290	11.1214	1.67343	1.73217	0.000197273	0.00851737	gal
LMD38_RS10515	22.5869	-3.58692	1.2133	1.28873e-06	0.000140958	gal
LMD38_RS11635	60.4135	-0.818749	0.398316	0.00190788	0.0449311	gal
LMD38_RS12115	915.275	-2.58971	0.516754	1.17977e-08	4.14774e-06	gal
LMD38_RS12385	459.57	0.824473	0.367859	0.00131175	0.0342219	gal
LMD38_RS12550	18.8712	1.4003	1.30048	0.000843976	0.0251775	gal
LMD38_RS12695	113.667	1.51298	0.950956	0.000576562	0.0194372	gal
LMD38_RS12880	4231.83	-2.18571	0.621959	2.33446e-06	0.000234494	gal
LMD38_RS12885	1639.84	-1.17421	0.580041	0.000482222	0.0170755	gal
LMD38_RS13190	499.161	1.14536	0.398668	5.28307e-05	0.00288925	gal
LMD38_RS13195	745.455	2.20494	0.452302	1.33546e-08	4.38209e-06	gal
LMD38_RS13200	739.696	1.70697	0.455333	6.09307e-07	8.33058e-05	gal
LMD38_RS13205	2434.12	1.0881	0.575588	0.00084914	0.0251775	gal
LMD38_RS13315	103.508	1.60818	0.662983	7.15217e-05	0.00362918	gal
LMD38_RS13735	21.7768	2.75705	1.86818	2.93524e-05	0.00200656	gal
LMD38_RS14425	29.5286	1.4602	0.966895	0.000725388	0.0228869	gal
LMD38_RS14445	96.3912	1.4021	0.749382	0.000410693	0.0148635	gal
LMD38_RS14630	41.8325	1.5532	1.04265	0.000601624	0.0200442	gal
LMD38_RS14685	207.115	-0.975971	0.429201	0.000575696	0.0194372	gal
LMD38_RS14955	18.5621	2.90262	1.08078	8.27291e-06	0.000691549	gal
LMD38_RS14960	794.472	1.60137	0.316958	9.56748e-10	4.28101e-07	gal
LMD38_RS14970	224.215	1.18035	0.308631	1.33766e-06	0.000143129	gal
LMD38_RS15205	150.042	1.0529	0.358723	7.06068e-05	0.00362007	gal
LMD38_RS15450	137.695	-0.961948	0.384786	0.000368745	0.0135445	gal
LMD38_RS15510	177.667	-1.62169	0.549951	1.32514e-05	0.00101911	gal
LMD38_RS15670	27.0642	2.41699	0.99168	2.98566e-05	0.00201307	gal
LMD38_RS15910	40.5278	1.41602	0.947835	0.000818866	0.0249806	gal
LMD38_RS16440	824.971	-1.83414	0.497204	8.93793e-07	0.000112801	gal
LMD38_RS16855	44.9897	1.12321	0.624341	0.000924061	0.0264432	gal
LMD38_RS16905	445.792	-2.94062	0.468963	1.26173e-11	6.90025e-09	gal
LMD38_RS16910	262.549	-3.17857	0.445497	2.22963e-14	2.74356e-11	gal
LMD38_RS17170	1155.14	-1.90938	0.518509	1.00574e-06	0.000118741	gal
LMD38_RS17175	1038.93	-2.08509	0.469173	6.54092e-08	1.34143e-05	gal
LMD38_RS17230	279.56	-0.746691	0.320403	0.00164098	0.0400248	gal
LMD38_RS17765	133.699	0.802575	0.350615	0.00133876	0.0346808	gal
LMD38_RS17780	151.114	-1.23943	0.437465	4.05448e-05	0.00234778	gal
LMD38_RS17800	171.959	-1.50253	0.554631	3.33072e-05	0.00205387	gal
LMD38_RS17850	164.638	-3.40122	0.563392	1.23855e-11	6.90025e-09	gal
LMD38_RS17895	1293.19	0.975226	0.415134	0.000488464	0.017173	gal
LMD38_RS18170	619.164	1.99492	0.645946	8.34693e-06	0.000691549	gal
LMD38_RS18240	71.087	-1.05054	0.507964	0.000659764	0.0211597	gal
LMD38_RS18270	10.1002	1.28429	1.4767	0.000610775	0.0201761	gal
LMD38_RS18370	53.1105	-1.22006	0.741314	0.000978874	0.0273751	gal
LMD38_RS18695	143.797	1.2411	0.401568	1.67654e-05	0.00121352	gal
LMD38_RS18765	412.094	0.924891	0.268947	3.30905e-05	0.00205387	gal
LMD38_RS18975	108.209	1.14053	0.591064	0.000662046	0.0211597	gal
LMD38_RS19135	751.04	-1.21805	0.687127	0.000757831	0.0236079	gal
LMD38_RS19145	93.6464	-1.07089	0.650739	0.00146397	0.0371427	gal
LMD38_RS19210	176.07	1.43332	0.937242	0.000749215	0.0234881	gal
LMD38_RS19215	187.791	1.27272	0.44999	3.67313e-05	0.00218485	gal
LMD38_RS19225	1160.51	0.869472	0.340559	0.000538059	0.0186502	gal
LMD38_RS19230	472.029	0.837194	0.366968	0.00113537	0.0307049	gal
LMD38_RS19265	188.851	-1.02294	0.402804	0.000245339	0.00997981	gal
LMD38_RS19375	186.252	-1.67479	0.657199	4.70264e-05	0.00263027	gal
LMD38_RS19410	142.468	-1.53733	0.569839	3.31767e-05	0.00205387	gal
LMD38_RS19515	261.58	-1.80607	0.56251	5.23804e-06	0.0004958	gal
LMD38_RS19765	421.939	-0.82399	0.344736	0.000976808	0.0273751	gal
LMD38_RS19780	162.733	-2.1324	0.4594	3.14178e-08	7.02902e-06	gal
LMD38_RS19785	631.387	-1.0463	0.548866	0.000946237	0.0269213	gal
LMD38_RS19805	139.074	-1.50307	0.60546	6.81927e-05	0.0035331	gal
LMD38_RS19830	2961.06	1.03309	0.460544	0.000477677	0.0170372	gal
LMD38_RS19930	677.784	-0.793836	0.350703	0.00147176	0.0371487	gal
LMD38_RS20270	42.4129	1.21285	1.04675	0.00181833	0.0432359	gal
LMD38_RS20300	1136.16	-0.93787	0.537291	0.00192955	0.045225	gal
LMD38_RS20565	113.11	-1.40991	0.517883	3.68433e-05	0.00218485	gal
LMD38_RS20595	898.9	0.760979	0.346199	0.00197013	0.0456017	gal
LMD38_RS20660	1759.28	-1.20345	0.505968	0.000179072	0.00786956	gal
LMD38_RS20850	176.819	1.02696	0.629183	0.00172177	0.0415418	gal
LMD38_RS21020	1091.03	-2.39788	0.504214	3.07935e-08	7.02902e-06	gal
LMD38_RS21145	506.787	-1.55231	0.72399	0.000165515	0.00740604	gal
LMD38_RS21265	6.18268	1.04637	1.3827	0.000962507	0.0272268	gal
LMD38_RS21320	1901.18	-3.3682	0.487423	5.32192e-14	4.36574e-11	gal
LMD38_RS21325	578.714	-3.27568	0.37247	2.82135e-20	1.38867e-16	gal
LMD38_RS21465	291.361	1.30056	0.737953	0.000640674	0.020746	gal
LMD38_RS21480	660.821	0.86287	0.430663	0.00168805	0.0409291	gal
LMD38_RS21860	315.742	-0.876623	0.478626	0.00214553	0.0480014	gal
LMD38_RS22135	126.149	-0.811486	0.395348	0.00198866	0.0456017	gal
LMD38_RS22205	18.3606	1.27764	1.35691	0.000911669	0.0263371	gal
LMD38_RS22210	366.016	-0.908346	0.300034	0.000129786	0.00608388	gal
LMD38_RS22230	277.347	0.874687	0.291462	0.00017167	0.00761224	gal
LMD38_RS22475	277.391	-0.729171	0.297175	0.00139108	0.0357154	gal
LMD38_RS22575	19.2502	1.61515	1.41998	0.000440319	0.0158193	gal
LMD38_RS22650	34.0257	-1.12702	0.88071	0.00221909	0.0494224	gal
LMD38_RS22740	180.983	-1.33371	0.472286	3.11303e-05	0.00205387	gal
LMD38_RS22750	425.378	-1.02966	0.281602	7.3193e-06	0.000655011	gal
LMD38_RS23005	444.066	-2.52698	0.659876	9.22054e-07	0.000113459	gal
LMD38_RS23055	193.142	-0.976819	0.467079	0.000846908	0.0251775	gal
LMD38_RS23105	3704.92	-1.10334	0.601206	0.000909211	0.0263371	gal
LMD38_RS23275	509.198	-2.4104	0.364154	1.8757e-12	1.31888e-09	gal
LMD38_RS23355	392.013	-1.08477	0.457009	0.000280989	0.0109764	gal
LMD38_RS23400	8.51834	-1.04338	1.54045	0.000391821	0.0142855	gal
LMD38_RS23410	5.83784	-3.48071	2.17881	7.16607e-06	0.000653174	gal
LMD38_RS23470	1015.24	-2.53548	0.430668	1.57066e-10	7.73081e-08	gal
LMD38_RS23585	87.5182	-1.65664	0.600109	2.45609e-05	0.00175201	gal
LMD38_RS23645	840.676	-0.901733	0.284964	9.12312e-05	0.0044904	gal
LMD38_RS23695	32.989	-1.77465	0.936493	0.00021251	0.009017	gal
LMD38_RS23815	2281.77	0.690489	0.295942	0.00213232	0.0480014	gal
LMD38_RS23870	340.481	-0.900897	0.294382	0.00012394	0.0058657	gal
LMD38_RS23915	87.037	1.76879	0.669613	3.36335e-05	0.00205387	gal
LMD38_RS23985	1962.65	-0.656366	0.271525	0.00207579	0.047301	gal
LMD38_RS24010	242.412	-0.919855	0.262225	2.71676e-05	0.00188337	gal
LMD38_RS24115	620.289	-0.835106	0.382828	0.0013932	0.0357154	gal
LMD38_RS24170	3197.64	-1.13003	0.625239	0.000890168	0.0260798	gal
LMD38_RS24175	8667.59	-1.03387	0.584125	0.00129872	0.0342219	gal
LMD38_RS24310	115.199	-1.04089	0.612003	0.00144916	0.0369573	gal
LMD38_RS24615	261.751	-1.07655	0.393039	0.000110073	0.00525997	gal
LMD38_RS24630	1108.26	-1.21628	0.382575	1.35897e-05	0.00102905	gal
LMD38_RS24645	163.439	-1.00356	0.40687	0.000323325	0.0123365	gal
LMD38_RS24655	704.878	-0.933722	0.494987	0.00152064	0.037611	gal
LMD38_RS24740	7.89317	-1.50474	1.68245	0.000260831	0.0104375	gal
LMD38_RS24880	457.17	-0.612962	0.218321	0.000991328	0.0275668	gal
LMD38_RS24985	1361.53	-1.69672	0.588577	1.61365e-05	0.00118543	gal
LMD38_RS25020	196.946	-1.28235	0.395983	8.31418e-06	0.000691549	gal
LMD38_RS25060	516.529	-1.91362	0.423853	3.14141e-08	7.02902e-06	gal
LMD38_RS25310	1002.86	-2.05981	0.552251	1.01323e-06	0.000118741	gal
LMD38_RS25490	614.775	2.10323	0.552507	8.0803e-07	0.000104661	gal
LMD38_RS25500	3248.99	1.40972	0.371293	5.60936e-07	7.88836e-05	gal
LMD38_RS25690	645.97	-1.06509	0.346168	4.26022e-05	0.00243823	gal
LMD38_RS25745	446.317	-0.747988	0.206807	5.27321e-05	0.00288925	gal
LMD38_RS25755	8223.21	-1.59321	0.665531	7.96224e-05	0.00399899	gal
LMD38_RS25760	1360.94	-2.32665	0.541765	1.75538e-07	2.97931e-05	gal
LMD38_RS25765	910.202	-2.64018	0.508395	5.25282e-09	2.15453e-06	gal
LMD38_RS25805	334.52	-2.84491	0.586888	2.08207e-08	6.40496e-06	gal
LMD38_RS25815	355.271	-2.49034	0.60297	3.48501e-07	5.71774e-05	gal
LMD38_RS25855	53.4898	2.12012	0.86611	4.34314e-05	0.00245712	gal
LMD38_RS26000	341.947	-0.931164	0.547318	0.00213988	0.0480014	gal
LMD38_RS26055	820.478	-2.10498	0.450855	2.61601e-08	6.77685e-06	gal
LMD38_RS26085	224.438	-0.993804	0.35405	0.000142344	0.0064277	gal
LMD38_RS26640	593.595	-1.79451	0.374639	6.03699e-09	2.2857e-06	gal
LMD38_RS27320	18.2125	2.71279	1.76883	3.34241e-05	0.00205387	gal
LMD38_RS27435	168.067	0.88681	0.383283	0.000822198	0.0249806	gal
LMD38_RS27440	241.025	-1.94308	0.549374	1.79288e-06	0.000187757	gal
LMD38_RS27445	1250.45	-1.79844	0.534849	3.01389e-06	0.000296688	gal
LMD38_RS28675	70.4012	-1.16206	0.516398	0.000287667	0.0111488	gal
LMD38_RS27925	325.251	-1.05083	0.504872	0.000640105	0.020746	gal
LMD38_RS27935	491.407	-0.89728	0.437182	0.00131019	0.0342219	gal
LMD38_RS27995	638.986	-0.895578	0.426421	0.00120547	0.0324227	gal
LMD38_RS28000	1364.62	-1.30615	0.412768	1.00848e-05	0.000813731	gal
LMD38_RS28370	99.0173	-1.39371	0.658396	0.00022831	0.00946717	gal
LMD38_RS00025	204.046	-2.21955	0.509846	1.12438e-06	1.72174e-05	glu
LMD38_RS00090	906.289	-3.0297	0.417227	4.59124e-15	4.92132e-13	glu
LMD38_RS00095	294.383	-2.32092	0.349346	2.47183e-12	1.58117e-10	glu
LMD38_RS00100	245.307	-2.2854	0.461954	5.83416e-08	1.32978e-06	glu
LMD38_RS00105	224.63	-2.15271	0.46502	3.72467e-07	6.65407e-06	glu
LMD38_RS00110	559.573	-3.07062	0.364454	4.10926e-19	8.59377e-17	glu
LMD38_RS00115	91.6921	-1.47446	0.541216	0.00197255	0.0107608	glu
LMD38_RS00125	1648.83	-1.49667	0.458615	0.000350241	0.00255812	glu
LMD38_RS00145	3299.14	2.1824	0.521329	2.53172e-06	3.53549e-05	glu
LMD38_RS00160	1445.95	-1.2383	0.426373	0.00168547	0.00953578	glu
LMD38_RS00180	655.696	0.907373	0.342705	0.00539986	0.0247582	glu
LMD38_RS00195	50.8198	-1.56634	0.596913	0.00217886	0.0116304	glu
LMD38_RS00200	367.035	1.17456	0.332246	0.000210613	0.00169002	glu
LMD38_RS00215	229.749	1.39808	0.424486	0.000370239	0.00266976	glu
LMD38_RS00235	316.224	1.24421	0.456596	0.0028689	0.0147003	glu
LMD38_RS00240	561.708	1.32172	0.322204	1.79085e-05	0.000200636	glu
LMD38_RS00245	875.991	2.11654	0.380843	3.2368e-09	9.65198e-08	glu
LMD38_RS00270	147.029	1.10259	0.438678	0.00633655	0.0280477	glu
LMD38_RS00275	1331.93	0.941321	0.391326	0.0102559	0.0417607	glu
LMD38_RS00290	564.971	1.81198	0.515013	7.91852e-05	0.000730087	glu
LMD38_RS00300	4248.73	1.91276	0.537214	5.48949e-05	0.000529715	glu
LMD38_RS00325	236.971	-1.46984	0.650035	0.00649286	0.0286673	glu
LMD38_RS00420	310.875	-1.26977	0.528735	0.00669723	0.0292847	glu
LMD38_RS00445	174.255	1.14381	0.449733	0.00552875	0.0251457	glu
LMD38_RS00600	785.047	0.877867	0.271266	0.000845602	0.00532327	glu
LMD38_RS00605	214.158	1.95962	0.394681	1.07712e-07	2.26024e-06	glu
LMD38_RS00610	710.881	1.85878	0.29719	7.97854e-11	3.90653e-09	glu
LMD38_RS00655	764.154	-1.0167	0.333351	0.00138865	0.00803999	glu
LMD38_RS00700	134.755	-1.25357	0.469253	0.00330348	0.0164593	glu
LMD38_RS00740	803.947	-3.4236	0.412802	2.83773e-19	7.03403e-17	glu
LMD38_RS00780	40.1983	-2.0059	0.780907	0.000836231	0.00528946	glu
LMD38_RS00790	567.189	-1.59322	0.438915	7.93412e-05	0.000730087	glu
LMD38_RS00795	435.495	-2.90578	0.393514	2.82054e-15	3.29008e-13	glu
LMD38_RS00825	215.308	-1.65886	0.584089	0.000987859	0.00608361	glu
LMD38_RS00830	177.646	1.33638	0.365959	0.000109445	0.000949802	glu
LMD38_RS00850	4107.93	-2.31282	0.632232	1.43631e-05	0.000165593	glu
LMD38_RS00920	514.12	1.38873	0.526535	0.00292948	0.0148953	glu
LMD38_RS00925	448.536	1.04613	0.423001	0.00758886	0.032573	glu
LMD38_RS00990	2062.27	1.94021	0.384299	7.2865e-08	1.59659e-06	glu
LMD38_RS00995	201.542	1.52093	0.42397	0.000105301	0.000925997	glu
LMD38_RS01000	206.101	1.11862	0.489649	0.0112881	0.0450387	glu
LMD38_RS01005	576.056	1.18329	0.368332	0.000662313	0.00433454	glu
LMD38_RS01010	1445.76	0.846249	0.358406	0.0126862	0.0496188	glu
LMD38_RS01050	1887.27	1.57439	0.47334	0.000246662	0.00191816	glu
LMD38_RS01075	195.538	-0.965567	0.373334	0.0060717	0.027087	glu
LMD38_RS01080	119.976	-0.915029	0.382063	0.0108411	0.0434741	glu
LMD38_RS01125	338.965	0.994426	0.318748	0.00112697	0.00680299	glu
LMD38_RS01130	436.206	1.25477	0.279275	3.39097e-06	4.57435e-05	glu
LMD38_RS01160	541.986	1.23515	0.476712	0.00425934	0.0204016	glu
LMD38_RS01165	1203.05	1.88179	0.301743	8.59008e-11	4.15466e-09	glu
LMD38_RS01170	1104.04	1.40168	0.392749	0.000136253	0.00116211	glu
LMD38_RS01175	317.622	1.99931	0.352463	2.12233e-09	6.89932e-08	glu
LMD38_RS01180	85.9809	2.13066	0.745063	0.000287887	0.00217478	glu
LMD38_RS01185	1404.86	1.09875	0.468589	0.00995878	0.0407181	glu
LMD38_RS01300	9495.86	4.92937	0.426029	1.15471e-35	4.57958e-32	glu
LMD38_RS01305	20846.5	3.42786	0.678822	7.48715e-10	2.69946e-08	glu
LMD38_RS01310	30099.4	4.62361	0.715392	3.73488e-15	4.2056e-13	glu
LMD38_RS01315	19569.7	3.44829	0.722627	2.69944e-09	8.36406e-08	glu
LMD38_RS01320	62688.4	3.81401	0.723595	4.86793e-11	2.47516e-09	glu
LMD38_RS01325	29069.6	2.6919	0.643399	6.13823e-07	1.03592e-05	glu
LMD38_RS01340	95.6746	1.74097	0.599179	0.000685179	0.00444749	glu
LMD38_RS01365	1395474	-2.91594	0.759783	1.06946e-06	1.65683e-05	glu
LMD38_RS01375	365.552	1.996	0.513154	1.31024e-05	0.000152388	glu
LMD38_RS01455	97.0036	-1.30022	0.444356	0.0014404	0.00832744	glu
LMD38_RS01490	719.987	2.96775	0.445471	3.76677e-13	2.92922e-11	glu
LMD38_RS01500	302.564	-1.41088	0.550075	0.00343557	0.0169471	glu
LMD38_RS01525	920.742	-4.3145	0.416656	1.18785e-29	1.17775e-26	glu
LMD38_RS01545	373.39	2.08976	0.447213	3.47928e-07	6.30084e-06	glu
LMD38_RS01560	3520.24	-2.02463	0.494478	5.34231e-06	6.88261e-05	glu
LMD38_RS01590	157.899	-1.45634	0.507533	0.00133262	0.0077723	glu
LMD38_RS01595	655.329	-2.36733	0.294331	6.71717e-17	9.86677e-15	glu
LMD38_RS01610	1821.85	1.92432	0.414628	5.69931e-07	9.70105e-06	glu
LMD38_RS01620	276.856	-1.18914	0.470478	0.00542269	0.0247883	glu
LMD38_RS01655	374.112	1.39753	0.298715	1.16081e-06	1.7639e-05	glu
LMD38_RS01665	371.862	2.07503	0.302506	9.36778e-13	6.62843e-11	glu
LMD38_RS01675	44.0699	1.86962	0.83484	0.00240145	0.0125981	glu
LMD38_RS01705	349.011	-2.27518	0.580944	6.0371e-06	7.62521e-05	glu
LMD38_RS01720	623.361	1.08408	0.375004	0.00214366	0.0114889	glu
LMD38_RS01740	155.154	-2.06346	0.657601	0.000157859	0.00131251	glu
LMD38_RS01770	657.897	-3.2892	0.521348	1.06942e-12	7.31263e-11	glu
LMD38_RS01775	117.252	-1.39855	0.440259	0.000551365	0.00369377	glu
LMD38_RS01785	1606.35	-1.3708	0.373283	9.62546e-05	0.000857855	glu
LMD38_RS01790	727.475	-1.74569	0.426871	9.5791e-06	0.000113745	glu
LMD38_RS01795	4541.97	-1.80858	0.632661	0.000673219	0.00438422	glu
LMD38_RS01850	160.75	1.31463	0.422525	0.000778171	0.00497778	glu
LMD38_RS01865	662.918	1.14274	0.476683	0.00819072	0.0347726	glu
LMD38_RS01875	160.935	1.79323	0.536105	0.000151533	0.00127057	glu
LMD38_RS01895	843.667	1.33245	0.429165	0.000774654	0.00496329	glu
LMD38_RS01915	2740.08	1.69947	0.425911	1.57894e-05	0.000179429	glu
LMD38_RS01920	3398.93	1.46767	0.566755	0.00289774	0.0147718	glu
LMD38_RS01945	102.576	1.51342	0.634951	0.00446468	0.0212267	glu
LMD38_RS01960	3299.01	1.15541	0.467892	0.00665269	0.0291542	glu
LMD38_RS01965	150.323	1.10596	0.434711	0.00579791	0.0261436	glu
LMD38_RS01970	176.595	1.1627	0.397547	0.00175004	0.00981706	glu
LMD38_RS02035	99.3812	-1.82615	0.549217	0.000151299	0.00127057	glu
LMD38_RS02075	1037.8	2.28102	0.467181	8.14287e-08	1.75514e-06	glu
LMD38_RS02090	92.8751	-1.56852	0.616907	0.00268468	0.0139365	glu
LMD38_RS02150	203.567	-1.31596	0.349813	7.33048e-05	0.000684063	glu
LMD38_RS02160	462.747	1.36621	0.290689	1.09248e-06	1.68591e-05	glu
LMD38_RS02165	638.591	1.56636	0.43305	8.72414e-05	0.000788153	glu
LMD38_RS02185	574.57	1.31626	0.564409	0.00737335	0.0318548	glu
LMD38_RS02285	166.067	-1.05021	0.438689	0.00932851	0.0384583	glu
LMD38_RS02305	96.7293	-1.39976	0.571299	0.00473187	0.0221304	glu
LMD38_RS02310	133.405	-1.49731	0.43417	0.00018241	0.00148856	glu
LMD38_RS02335	179.625	1.00164	0.403459	0.00779166	0.0333352	glu
LMD38_RS02340	832.811	1.19901	0.383855	0.000876746	0.00549096	glu
LMD38_RS02350	3022.25	1.44567	0.518727	0.00173401	0.00976857	glu
LMD38_RS02400	49.3298	-1.54444	0.783954	0.00957732	0.0393205	glu
LMD38_RS02405	366.982	-2.92096	0.702105	3.06034e-07	5.59323e-06	glu
LMD38_RS02505	496.087	-2.19537	0.506465	1.29313e-06	1.94264e-05	glu
LMD38_RS02565	120.789	-1.58655	0.522593	0.000630518	0.00414013	glu
LMD38_RS02570	392.667	2.22324	0.400451	2.6614e-09	8.31111e-08	glu
LMD38_RS02575	554.996	2.13291	0.270436	3.83757e-16	4.90962e-14	glu
LMD38_RS02580	236.314	1.54907	0.338451	1.50721e-06	2.23879e-05	glu
LMD38_RS02585	832.341	1.2004	0.409658	0.00163673	0.00929981	glu
LMD38_RS02630	510.618	1.34091	0.376122	0.000151101	0.00127057	glu
LMD38_RS02635	465.644	1.83621	0.418717	2.21655e-06	3.14956e-05	glu
LMD38_RS02690	232.442	0.974974	0.362654	0.00447442	0.0212267	glu
LMD38_RS02720	773.52	2.23966	0.354383	2.48453e-11	1.31382e-09	glu
LMD38_RS02780	85.1101	-1.89506	0.634664	0.000379822	0.00271724	glu
LMD38_RS02785	3634.54	1.89976	0.564033	0.000111223	0.000961023	glu
LMD38_RS02790	551.023	-1.23405	0.392707	0.000785989	0.0050197	glu
LMD38_RS02795	106.246	-1.3809	0.605017	0.00738783	0.0318826	glu
LMD38_RS02820	46.5675	1.24949	0.541676	0.00877656	0.0365245	glu
LMD38_RS02825	738.033	1.46113	0.295379	2.79094e-07	5.19665e-06	glu
LMD38_RS02835	1329.33	1.82534	0.515724	7.13808e-05	0.00066768	glu
LMD38_RS02840	2843.78	1.53858	0.552853	0.00148026	0.00852061	glu
LMD38_RS02850	306.12	1.64593	0.358771	1.22303e-06	1.84431e-05	glu
LMD38_RS02855	347.473	0.922915	0.376001	0.00915968	0.0379199	glu
LMD38_RS02895	184.042	2.39123	0.449758	6.61143e-09	1.85964e-07	glu
LMD38_RS02905	428.187	3.24585	0.853946	3.62206e-07	6.52958e-06	glu
LMD38_RS02985	124.123	-1.12643	0.50335	0.0125246	0.0492295	glu
LMD38_RS03000	151.339	-1.99853	0.579988	6.79002e-05	0.000641172	glu
LMD38_RS03005	135.917	-1.41118	0.58029	0.00485299	0.0226435	glu
LMD38_RS03065	4046.32	-4.78267	0.751675	7.14888e-15	7.08811e-13	glu
LMD38_RS03130	136.954	1.74794	0.601187	0.000671111	0.00437768	glu
LMD38_RS03155	173.487	1.99705	0.658118	0.00025552	0.00196775	glu
LMD38_RS03180	302.86	2.06835	0.291664	1.83181e-13	1.51353e-11	glu
LMD38_RS03185	1644.26	2.92941	0.346981	5.70084e-19	1.07664e-16	glu
LMD38_RS03200	96.6119	-1.21554	0.558729	0.012683	0.0496188	glu
LMD38_RS03210	9902.33	-1.57508	0.586101	0.00180339	0.0100453	glu
LMD38_RS03260	78.6256	-1.34116	0.488384	0.00232681	0.0122571	glu
LMD38_RS03270	37.2571	-1.56967	0.933213	0.0122265	0.0481055	glu
LMD38_RS03380	166.783	-1.00076	0.38641	0.00578443	0.0261287	glu
LMD38_RS03385	1747.41	1.50722	0.583929	0.00274777	0.0141528	glu
LMD38_RS03390	1878.53	-1.18842	0.501955	0.00828225	0.0350186	glu
LMD38_RS03430	433.982	1.65108	0.302832	1.39108e-08	3.62962e-07	glu
LMD38_RS03445	314.341	0.998748	0.376254	0.00481647	0.0224995	glu
LMD38_RS03450	314.682	0.924528	0.356957	0.00626881	0.0278411	glu
LMD38_RS03465	2421.74	1.09626	0.347037	0.000883648	0.00551897	glu
LMD38_RS03490	123.304	2.62446	0.509663	8.6242e-09	2.35887e-07	glu
LMD38_RS03500	326.442	2.86503	0.536918	1.53419e-09	5.11311e-08	glu
LMD38_RS03530	4795.15	1.99982	0.645943	0.000211124	0.00169002	glu
LMD38_RS03535	142.824	2.27331	0.740234	0.000106307	0.000930716	glu
LMD38_RS03590	427.714	-2.08925	0.354203	4.67078e-10	1.85243e-08	glu
LMD38_RS03610	213.947	2.85959	0.609933	3.90305e-08	9.21399e-07	glu
LMD38_RS03645	191.584	1.26938	0.401475	0.000701777	0.00453502	glu
LMD38_RS03680	164.949	-1.91047	0.662111	0.000488161	0.00333801	glu
LMD38_RS03685	941.995	-1.99451	0.652451	0.000240605	0.00187843	glu
LMD38_RS03690	490.95	-1.85911	0.400762	6.53558e-07	1.09831e-05	glu
LMD38_RS03710	242.225	1.40734	0.592921	0.00564914	0.0256344	glu
LMD38_RS03755	5724.66	1.82351	0.542888	0.000135541	0.00115852	glu
LMD38_RS03760	10892.4	1.37731	0.582455	0.00610529	0.0271757	glu
LMD38_RS03785	249.802	1.18465	0.381929	0.000960574	0.00596187	glu
LMD38_RS03790	13610.8	1.95944	0.698021	0.000532685	0.00359903	glu
LMD38_RS03850	908.079	1.84808	0.429551	3.13996e-06	4.29416e-05	glu
LMD38_RS03855	221.587	1.70347	0.435208	2.13992e-05	0.000237065	glu
LMD38_RS03930	2898.95	2.23807	0.438324	2.892e-08	6.99369e-07	glu
LMD38_RS03940	238.102	1.12999	0.343152	0.000534993	0.00360847	glu
LMD38_RS03955	1063.54	-1.54608	0.428216	9.25487e-05	0.000828551	glu
LMD38_RS03970	43.9318	-2.22466	0.833377	0.000340107	0.00249328	glu
LMD38_RS03995	1177.06	1.10738	0.476757	0.0104136	0.0421864	glu
LMD38_RS04000	319.863	1.94033	0.482523	8.67493e-06	0.000104893	glu
LMD38_RS04010	4671.86	-2.29316	0.59525	7.37298e-06	9.10942e-05	glu
LMD38_RS04065	1461.74	1.69525	0.381043	2.1472e-06	3.06324e-05	glu
LMD38_RS04075	150.582	1.40199	0.377046	7.69036e-05	0.000712616	glu
LMD38_RS04080	572.392	1.16679	0.330058	0.000212705	0.00169736	glu
LMD38_RS04110	385.846	0.848881	0.346601	0.0099903	0.0408048	glu
LMD38_RS04130	56.178	-2.05403	0.701183	0.000296706	0.00223278	glu
LMD38_RS04160	495.672	1.10938	0.308705	0.000182342	0.00148856	glu
LMD38_RS04205	88.8318	-1.53727	0.580014	0.00215109	0.0114976	glu
LMD38_RS04280	307.623	-1.77278	0.386781	9.99187e-07	1.5788e-05	glu
LMD38_RS04305	960.19	2.54067	0.577185	3.89585e-07	6.91981e-06	glu
LMD38_RS04315	57.839	1.22189	0.51656	0.0079171	0.0337626	glu
LMD38_RS04360	421.095	0.934747	0.370306	0.00746829	0.0321599	glu
LMD38_RS04365	949.778	1.94884	0.409549	3.08172e-07	5.60647e-06	glu
LMD38_RS04575	280.516	1.41409	0.260166	2.1854e-08	5.45112e-07	glu
LMD38_RS04595	293.824	1.60488	0.448122	9.32853e-05	0.000833264	glu
LMD38_RS04660	1558.36	0.931545	0.316053	0.00211115	0.0113607	glu
LMD38_RS04665	751.645	1.25709	0.48964	0.00439938	0.0209963	glu
LMD38_RS04690	298.285	1.43389	0.313187	1.78173e-06	2.60306e-05	glu
LMD38_RS04695	127.979	1.02999	0.395468	0.00536831	0.024642	glu
LMD38_RS04700	804.504	1.61439	0.374116	4.5226e-06	5.94576e-05	glu
LMD38_RS04745	966.301	1.26358	0.391412	0.000564478	0.00376889	glu
LMD38_RS04750	2148.48	1.76911	0.441493	1.29406e-05	0.000150949	glu
LMD38_RS04755	177.962	1.62428	0.440532	6.04304e-05	0.000578906	glu
LMD38_RS04760	1567.48	1.9214	0.460418	4.76419e-06	6.23591e-05	glu
LMD38_RS04765	567.749	1.57063	0.343975	1.53273e-06	2.26821e-05	glu
LMD38_RS04785	1760.72	1.74761	0.4688	4.1154e-05	0.000412163	glu
LMD38_RS04790	10377.5	1.53382	0.565694	0.00183028	0.0101381	glu
LMD38_RS04810	145.238	1.37827	0.484925	0.00164915	0.009357	glu
LMD38_RS04900	339.923	1.12816	0.281545	3.40754e-05	0.000352968	glu
LMD38_RS04910	805.386	1.70652	0.320173	2.49398e-08	6.10563e-07	glu
LMD38_RS05005	113.816	1.9068	0.552918	8.28966e-05	0.000755321	glu
LMD38_RS05010	173.614	1.03225	0.32999	0.0010531	0.00642521	glu
LMD38_RS05020	491.372	1.20628	0.403445	0.00134392	0.00782669	glu
LMD38_RS05035	1120.25	1.22771	0.318814	5.76698e-05	0.000553798	glu
LMD38_RS05040	143.646	2.04934	0.541537	1.75253e-05	0.000196899	glu
LMD38_RS05070	383.574	1.82061	0.594617	0.000359172	0.00260416	glu
LMD38_RS05075	1406.96	1.36838	0.556782	0.00491025	0.0227235	glu
LMD38_RS05080	586.164	1.53147	0.511406	0.000794556	0.00505812	glu
LMD38_RS05100	1358.44	-1.21741	0.449008	0.00310224	0.0156136	glu
LMD38_RS05105	377.232	-1.9868	0.437104	7.8864e-07	1.29782e-05	glu
LMD38_RS05130	369.335	2.88629	0.51612	3.53352e-10	1.44473e-08	glu
LMD38_RS05135	1682.63	2.74029	0.543128	1.03478e-08	2.75431e-07	glu
LMD38_RS05140	3116.89	2.61401	0.526999	2.31902e-08	5.71256e-07	glu
LMD38_RS05150	12792.5	1.4023	0.633459	0.00829295	0.0350265	glu
LMD38_RS05160	209.422	-1.18117	0.415498	0.00220194	0.0117063	glu
LMD38_RS05165	107.205	-1.56443	0.633685	0.00325976	0.0163029	glu
LMD38_RS05215	169.808	-2.4713	0.490485	2.31835e-08	5.71256e-07	glu
LMD38_RS05275	1820.77	2.86476	0.584801	1.41789e-08	3.6754e-07	glu
LMD38_RS05280	105.968	-2.69783	1.14654	0.00011992	0.00102944	glu
LMD38_RS05295	120.792	-1.52303	0.712954	0.00750736	0.032293	glu
LMD38_RS05315	336.152	1.1636	0.340846	0.000333799	0.00246417	glu
LMD38_RS05345	541.291	0.918828	0.364141	0.00761131	0.032634	glu
LMD38_RS05360	137.939	1.53531	0.629288	0.00372293	0.0181613	glu
LMD38_RS05410	2487.88	2.19326	0.441558	6.52275e-08	1.46154e-06	glu
LMD38_RS05415	2246.01	1.71419	0.574176	0.000571737	0.00379817	glu
LMD38_RS05425	3584.13	1.75766	0.545836	0.00024821	0.00192642	glu
LMD38_RS05430	3259.95	2.38518	0.447314	6.17032e-09	1.74796e-07	glu
LMD38_RS05435	495.074	1.71946	0.473127	6.20153e-05	0.000589815	glu
LMD38_RS05440	1430.67	1.27019	0.491073	0.00409014	0.0197582	glu
LMD38_RS05450	5124.87	2.51982	0.570765	3.90831e-07	6.91981e-06	glu
LMD38_RS05470	514.179	0.698496	0.279526	0.00984647	0.0403004	glu
LMD38_RS05505	281.007	1.47879	0.51554	0.00128504	0.00753807	glu
LMD38_RS05515	2217.38	1.3135	0.473067	0.00222244	0.0117994	glu
LMD38_RS05525	75.4034	-1.5062	0.489965	0.00064604	0.00423503	glu
LMD38_RS05555	323.79	1.84757	0.390664	4.32256e-07	7.5521e-06	glu
LMD38_RS05570	241.183	1.15325	0.456079	0.0056837	0.0257324	glu
LMD38_RS05575	496.331	1.13345	0.490227	0.0103194	0.0418903	glu
LMD38_RS05605	3510.76	1.77546	0.52778	0.000147214	0.00124224	glu
LMD38_RS05620	419.949	1.26629	0.315905	2.86697e-05	0.000304021	glu
LMD38_RS05630	201.845	1.29773	0.492138	0.00340596	0.0168429	glu
LMD38_RS05670	32.0628	-2.29752	0.964876	0.000458394	0.00318387	glu
LMD38_RS05680	191.486	0.997669	0.365557	0.00387096	0.018791	glu
LMD38_RS05710	1369.23	0.989522	0.279141	0.00024901	0.00192885	glu
LMD38_RS05715	680.325	1.4408	0.425906	0.000253015	0.00195606	glu
LMD38_RS05760	1182.12	1.07354	0.445224	0.00865686	0.0361782	glu
LMD38_RS05790	40.5831	-1.7108	0.844831	0.00545704	0.0248766	glu
LMD38_RS05800	106.057	-2.3881	0.655223	1.21656e-05	0.000142748	glu
LMD38_RS05825	50.1111	-2.42806	0.784635	6.12903e-05	0.00058432	glu
LMD38_RS05930	73.0479	-1.24916	0.560525	0.0106011	0.0427277	glu
LMD38_RS05935	159.709	2.29775	0.631657	1.61154e-05	0.000182611	glu
LMD38_RS05950	106.982	-1.4749	0.409921	0.000109021	0.000948198	glu
LMD38_RS06040	97.2948	-1.53487	0.821803	0.0114255	0.0454498	glu
LMD38_RS06060	874.585	1.65343	0.487933	0.000171641	0.00141819	glu
LMD38_RS06080	1134.4	1.8983	0.429111	1.64996e-06	2.43262e-05	glu
LMD38_RS06085	857.708	0.851573	0.353899	0.0111931	0.0447497	glu
LMD38_RS06100	2440.14	1.1304	0.462014	0.00731483	0.0316815	glu
LMD38_RS06120	154.463	-1.22394	0.451361	0.00307057	0.0154935	glu
LMD38_RS06230	200.095	1.2644	0.355585	0.000173853	0.00143348	glu
LMD38_RS06265	3861.44	-1.65376	0.625527	0.00171932	0.00969963	glu
LMD38_RS06270	3665.88	-1.68072	0.589316	0.000911685	0.00567621	glu
LMD38_RS06275	6222.63	-2.05829	0.629401	0.00010562	0.000926747	glu
LMD38_RS06315	1692.67	1.52578	0.49304	0.000584141	0.00387408	glu
LMD38_RS06345	7599.59	1.84804	0.621558	0.000440818	0.00307796	glu
LMD38_RS06385	198.961	-1.37837	0.409532	0.000296214	0.00223278	glu
LMD38_RS06415	321.102	1.5194	0.492048	0.000603718	0.00399057	glu
LMD38_RS06420	562.212	0.956324	0.318378	0.00171849	0.00969963	glu
LMD38_RS06425	183.883	1.93443	0.654051	0.000374539	0.00269098	glu
LMD38_RS06430	428.983	1.84108	0.390251	4.62981e-07	8.03606e-06	glu
LMD38_RS06435	1416.16	1.9709	0.390104	6.73476e-08	1.50056e-06	glu
LMD38_RS06440	75.0331	1.53951	0.629629	0.00364221	0.0178542	glu
LMD38_RS06460	1889.16	-1.72553	0.55923	0.000409543	0.00290045	glu
LMD38_RS06465	153.929	-1.36737	0.51096	0.00272588	0.0140766	glu
LMD38_RS06520	344.966	1.26842	0.417505	0.00105676	0.00642521	glu
LMD38_RS06525	467.011	1.66875	0.308707	1.75137e-08	4.49781e-07	glu
LMD38_RS06570	156.247	-1.505	0.409469	7.73534e-05	0.000715113	glu
LMD38_RS06590	242.02	2.0278	0.41137	1.12507e-07	2.34844e-06	glu
LMD38_RS06600	722.343	2.25661	0.407273	2.63078e-09	8.2807e-08	glu
LMD38_RS06605	488.891	2.69537	0.371433	1.33717e-14	1.29347e-12	glu
LMD38_RS06630	874.936	2.57507	0.4417	2.29376e-10	9.67773e-09	glu
LMD38_RS06640	10926.5	1.43938	0.628989	0.00649821	0.0286673	glu
LMD38_RS06645	50333.1	1.32374	0.622327	0.0116939	0.0463933	glu
LMD38_RS06655	345.428	-1.16774	0.399929	0.00176523	0.00986042	glu
LMD38_RS06665	475.934	-2.72872	0.49996	1.22868e-09	4.16491e-08	glu
LMD38_RS06765	2149.23	1.58317	0.50128	0.000427999	0.00300965	glu
LMD38_RS06770	237.102	1.13866	0.501882	0.0114104	0.0454352	glu
LMD38_RS06775	74.4714	2.35249	0.729122	5.31713e-05	0.000514335	glu
LMD38_RS06810	635.733	1.01058	0.405647	0.00753155	0.032362	glu
LMD38_RS06815	599.191	1.38369	0.415904	0.00033689	0.00247427	glu
LMD38_RS06835	1238.84	1.88555	0.344144	7.94396e-09	2.1879e-07	glu
LMD38_RS06845	5274.31	1.71338	0.460031	4.4486e-05	0.000442184	glu
LMD38_RS06850	267.155	-1.51685	0.54437	0.00152687	0.00875083	glu
LMD38_RS06855	66.4931	-2.47724	0.67652	8.77936e-06	0.000105512	glu
LMD38_RS06875	401.63	0.768896	0.304065	0.00858392	0.0359491	glu
LMD38_RS06940	113.714	1.46413	0.485641	0.000839274	0.00530026	glu
LMD38_RS06945	81.5561	-1.89009	0.48778	1.7421e-05	0.000196283	glu
LMD38_RS06955	41.7258	-1.40665	0.669816	0.0104855	0.0423911	glu
LMD38_RS07040	78.1161	-1.95093	0.534773	3.65934e-05	0.000373084	glu
LMD38_RS07060	201.479	1.38333	0.518264	0.00270622	0.0140116	glu
LMD38_RS07135	396.499	0.996858	0.298606	0.000527319	0.00356885	glu
LMD38_RS07155	141.215	-1.56531	0.46165	0.000199921	0.00161813	glu
LMD38_RS07170	39.9712	1.53477	0.866466	0.0128048	0.0498857	glu
LMD38_RS07225	853.405	1.05473	0.302074	0.000284175	0.00215495	glu
LMD38_RS07240	250.512	1.81847	0.435513	5.78616e-06	7.3551e-05	glu
LMD38_RS07285	157.534	-6.14163	1.12869	1.06898e-11	6.05656e-10	glu
LMD38_RS07290	367.084	-5.63721	0.779753	7.96248e-17	1.11599e-14	glu
LMD38_RS07300	158.256	-2.32678	0.560996	2.07684e-06	2.97356e-05	glu
LMD38_RS07355	150.386	1.45057	0.351134	1.31583e-05	0.00015259	glu
LMD38_RS07395	273.007	-1.57512	0.405487	3.02212e-05	0.000317924	glu
LMD38_RS07400	234.82	-2.23949	0.481074	2.7002e-07	5.07535e-06	glu
LMD38_RS07405	125.07	-2.17433	0.524255	3.03939e-06	4.17101e-05	glu
LMD38_RS07510	765.414	2.36602	0.579216	2.4219e-06	3.40611e-05	glu
LMD38_RS07520	284.08	-2.34948	0.550223	1.16741e-06	1.76716e-05	glu
LMD38_RS07550	1096.08	0.870926	0.293145	0.00207045	0.011172	glu
LMD38_RS07595	3316.13	1.18427	0.518579	0.0102854	0.0418378	glu
LMD38_RS07620	849.878	1.37652	0.428673	0.000507912	0.00344338	glu
LMD38_RS07630	261.853	1.33775	0.436587	0.000877778	0.00549096	glu
LMD38_RS07640	1020.05	2.1077	0.446873	2.71382e-07	5.0769e-06	glu
LMD38_RS07645	634.157	1.25163	0.534526	0.00802312	0.0341413	glu
LMD38_RS07675	148.793	-1.75034	0.49417	8.22482e-05	0.000753341	glu
LMD38_RS07680	677.347	1.32373	0.448851	0.00129377	0.00756796	glu
LMD38_RS07685	1150.41	1.91497	0.436003	1.84255e-06	2.66699e-05	glu
LMD38_RS07690	1781.21	2.60447	0.466795	8.95601e-10	3.17139e-08	glu
LMD38_RS07695	10762.6	2.16222	0.542711	6.12493e-06	7.68717e-05	glu
LMD38_RS07700	2153.79	2.13135	0.545006	8.83855e-06	0.000105902	glu
LMD38_RS07705	1847.57	3.4367	0.418263	5.04559e-19	1.00054e-16	glu
LMD38_RS07710	1549.68	2.49659	0.512523	4.99651e-08	1.1521e-06	glu
LMD38_RS07715	1316.58	2.48327	0.396721	2.09471e-11	1.13803e-09	glu
LMD38_RS07745	233.502	-1.81559	0.386319	5.29699e-07	9.0943e-06	glu
LMD38_RS07750	208.599	1.12771	0.430425	0.00455646	0.021513	glu
LMD38_RS07845	199.927	1.3647	0.487996	0.0019321	0.0105547	glu
LMD38_RS07850	2461.3	1.93667	0.429979	1.05772e-06	1.65154e-05	glu
LMD38_RS07875	1373.53	1.15427	0.496164	0.00966465	0.0396381	glu
LMD38_RS07885	397.192	2.78982	0.320507	8.97103e-20	2.96492e-17	glu
LMD38_RS07900	645.25	1.62747	0.586554	0.0012711	0.0074684	glu
LMD38_RS07905	3998.21	2.09712	0.564812	2.05199e-05	0.00022796	glu
LMD38_RS07915	677.602	2.54909	0.526495	4.99494e-08	1.1521e-06	glu
LMD38_RS07935	145.113	1.06064	0.373951	0.00260874	0.01356	glu
LMD38_RS07965	2763.83	1.59994	0.451077	0.000106915	0.000933972	glu
LMD38_RS08015	639.577	1.10723	0.386232	0.0022472	0.011915	glu
LMD38_RS08035	2946.06	-1.78559	0.59007	0.000433263	0.00303055	glu
LMD38_RS08055	139.95	1.92404	0.621693	0.000255295	0.00196775	glu
LMD38_RS08125	3079.99	2.08868	0.530175	8.71098e-06	0.000105008	glu
LMD38_RS08130	3038.1	1.82529	0.570652	0.000230596	0.0018074	glu
LMD38_RS08135	1429.15	2.24168	0.391839	9.68631e-10	3.39964e-08	glu
LMD38_RS08160	144.571	-2.42008	0.532474	2.87182e-07	5.2975e-06	glu
LMD38_RS08165	1628.27	-2.64712	0.575924	1.18988e-07	2.45785e-06	glu
LMD38_RS08170	350.583	-2.61324	0.446624	1.82716e-10	7.9632e-09	glu
LMD38_RS08175	152.567	-2.18386	0.420267	2.03139e-08	5.12324e-07	glu
LMD38_RS08180	177.745	-1.94651	0.427365	8.19733e-07	1.33788e-05	glu
LMD38_RS08185	1073.52	1.34668	0.495507	0.00250349	0.0130815	glu
LMD38_RS08195	171.78	1.01355	0.402558	0.00697856	0.0303143	glu
LMD38_RS08205	381.157	1.25148	0.495822	0.00499302	0.0230528	glu
LMD38_RS08215	116.753	2.02658	0.453348	1.0266e-06	1.61567e-05	glu
LMD38_RS08220	931.64	1.19191	0.396535	0.00130178	0.00760362	glu
LMD38_RS08245	96.9322	-1.35569	0.613677	0.00917501	0.0379438	glu
LMD38_RS08255	7158.05	1.77275	0.543425	0.000209216	0.00168307	glu
LMD38_RS08260	3463.72	1.36643	0.601503	0.00778516	0.0333352	glu
LMD38_RS08300	583.376	1.56242	0.412659	4.57143e-05	0.000447661	glu
LMD38_RS08395	87.3771	-1.66839	0.631923	0.00168071	0.0095224	glu
LMD38_RS08405	719.176	1.0654	0.398258	0.0042017	0.0201499	glu
LMD38_RS08485	151.602	-4.50295	1.00105	5.3843e-10	2.07322e-08	glu
LMD38_RS08490	1498.06	-5.13845	0.517049	1.1631e-27	7.68808e-25	glu
LMD38_RS08535	586.268	1.91447	0.352788	1.00738e-08	2.69951e-07	glu
LMD38_RS08540	1072.61	1.15108	0.375554	0.00113137	0.00680883	glu
LMD38_RS08575	102.251	-1.56712	0.609236	0.0024936	0.013047	glu
LMD38_RS08580	156.946	1.20257	0.469801	0.00486979	0.0226685	glu
LMD38_RS08605	631.359	1.12211	0.494716	0.0116977	0.0463933	glu
LMD38_RS08635	125.177	1.02404	0.414764	0.00788005	0.0336408	glu
LMD38_RS08670	10968.1	-2.15341	0.615727	3.87796e-05	0.000390355	glu
LMD38_RS08675	350.113	-1.51794	0.448522	0.000221858	0.00175277	glu
LMD38_RS08690	117.592	-1.57336	0.640212	0.00328693	0.0164181	glu
LMD38_RS08780	225.463	-1.33226	0.545204	0.00542044	0.0247883	glu
LMD38_RS08795	96.1584	-1.26385	0.564399	0.0100844	0.0411044	glu
LMD38_RS08820	576.687	-2.05797	0.62011	9.02727e-05	0.00081184	glu
LMD38_RS08825	427.772	-2.53076	0.436172	3.03101e-10	1.25218e-08	glu
LMD38_RS08830	1175.57	-2.89888	0.530341	6.79414e-10	2.49496e-08	glu
LMD38_RS08835	1111.58	-2.32063	0.530296	7.92988e-07	1.29958e-05	glu
LMD38_RS08840	585.153	-2.00308	0.591933	8.30358e-05	0.000755321	glu
LMD38_RS08880	68.9847	-1.37158	0.509074	0.00257084	0.0134157	glu
LMD38_RS08885	71.91	-1.47312	0.56523	0.00274284	0.0141458	glu
LMD38_RS08905	225.029	1.31728	0.558945	0.00692698	0.0301232	glu
LMD38_RS09025	31890.6	-1.48481	0.654385	0.00618049	0.0274796	glu
LMD38_RS09065	64.047	-1.65886	0.772042	0.005192	0.0239157	glu
LMD38_RS09070	111.192	2.38922	0.579438	1.94325e-06	2.80252e-05	glu
LMD38_RS09085	3107.02	1.95295	0.483571	7.8625e-06	9.68406e-05	glu
LMD38_RS09090	236.163	3.34019	0.613131	1.34728e-10	6.14172e-09	glu
LMD38_RS09095	410.641	2.54986	0.378098	7.33067e-13	5.38397e-11	glu
LMD38_RS09100	19400.9	3.50304	0.624147	2.66905e-11	1.39282e-09	glu
LMD38_RS09105	348.016	2.38359	0.412247	4.90907e-10	1.90876e-08	glu
LMD38_RS09135	58.074	-1.25571	0.511612	0.00597153	0.0267303	glu
LMD38_RS09140	189.29	-2.31322	0.442925	1.31811e-08	3.46201e-07	glu
LMD38_RS09145	159.602	-2.36613	0.511089	2.23471e-07	4.34454e-06	glu
LMD38_RS09170	105.573	-1.84838	0.577918	0.000219332	0.00173974	glu
LMD38_RS09175	983.537	-2.85853	0.574389	9.89448e-09	2.66949e-07	glu
LMD38_RS09210	264.181	-1.62111	0.49606	0.000276607	0.00210561	glu
LMD38_RS09245	228.746	2.98566	0.655719	4.57793e-08	1.068e-06	glu
LMD38_RS09250	169.153	2.9103	0.83699	3.74995e-06	5.00752e-05	glu
LMD38_RS09255	436.226	2.57748	0.340783	1.8234e-15	2.19139e-13	glu
LMD38_RS09285	160.508	1.4565	0.427599	0.000227063	0.00178323	glu
LMD38_RS09390	309.562	1.80604	0.395861	1.03816e-06	1.62741e-05	glu
LMD38_RS09485	199.783	1.18186	0.348479	0.000353851	0.0025736	glu
LMD38_RS09630	716.794	1.60746	0.326517	2.51265e-07	4.76803e-06	glu
LMD38_RS09670	147.885	1.3709	0.442591	0.000748388	0.00480276	glu
LMD38_RS09695	45.5711	-3.29673	0.929555	7.48648e-07	1.24232e-05	glu
LMD38_RS09760	204.285	1.71639	0.462183	4.61183e-05	0.000449398	glu
LMD38_RS09775	110.662	-1.4427	0.530873	0.00212897	0.011441	glu
LMD38_RS09785	183.213	1.38226	0.382467	0.000118278	0.00101976	glu
LMD38_RS09800	222.655	2.99989	0.414986	6.46167e-15	6.57103e-13	glu
LMD38_RS09805	465.045	2.98287	0.450786	4.82589e-13	3.68067e-11	glu
LMD38_RS09835	858.695	1.71218	0.435996	1.99855e-05	0.000222648	glu
LMD38_RS09910	1098.17	5.02926	0.501291	3.16763e-28	2.51257e-25	glu
LMD38_RS09925	240.268	-4.97228	0.636005	1.69058e-19	5.15758e-17	glu
LMD38_RS09930	148.429	-4.60731	0.740456	1.93774e-14	1.74661e-12	glu
LMD38_RS09940	86.4826	-1.57446	0.717216	0.00589818	0.0264617	glu
LMD38_RS10045	89.4625	1.71109	0.802983	0.00462813	0.0217995	glu
LMD38_RS10060	159.456	2.48074	0.541026	2.0274e-07	4.00033e-06	glu
LMD38_RS10065	288.057	-1.6241	0.370848	3.3324e-06	4.52614e-05	glu
LMD38_RS10090	98.1158	1.50549	0.559387	0.00204339	0.0110561	glu
LMD38_RS10185	613.466	-1.68809	0.437265	2.73099e-05	0.000291943	glu
LMD38_RS10190	59.1804	-2.74011	0.684368	1.06786e-06	1.65683e-05	glu
LMD38_RS10215	38.9526	-1.82199	0.775343	0.00225412	0.0119357	glu
LMD38_RS10255	217.742	2.27205	0.427741	8.99674e-09	2.44391e-07	glu
LMD38_RS10280	130.81	-1.58651	0.444921	0.000102074	0.000903629	glu
LMD38_RS10320	191.257	1.34011	0.51137	0.00333074	0.0165743	glu
LMD38_RS10325	141.687	1.42888	0.471206	0.000842028	0.00530919	glu
LMD38_RS10395	130.005	2.19124	0.604299	2.23251e-05	0.000245267	glu
LMD38_RS10510	227.859	-1.69038	0.501002	0.00016843	0.00139456	glu
LMD38_RS10805	364.173	-1.10368	0.33086	0.000474218	0.00325953	glu
LMD38_RS10840	146.75	-1.65321	0.904721	0.0082608	0.0349651	glu
LMD38_RS10865	134.753	1.88691	0.661672	0.00056852	0.00378314	glu
LMD38_RS10940	116.966	1.60083	0.846169	0.0091115	0.0377599	glu
LMD38_RS10945	258.098	2.60382	0.492538	4.45621e-09	1.31725e-07	glu
LMD38_RS11110	195.692	-1.14711	0.478534	0.00814439	0.0346202	glu
LMD38_RS11165	154.225	-1.30218	0.502517	0.00383998	0.0186635	glu
LMD38_RS11190	30.5968	-2.14703	0.986661	0.00103279	0.00633085	glu
LMD38_RS11205	56.5689	-1.78795	0.669753	0.00117954	0.0070347	glu
LMD38_RS11215	178.021	-1.23304	0.501252	0.00609484	0.0271597	glu
LMD38_RS11330	108.516	-1.37135	0.461892	0.00112942	0.00680743	glu
LMD38_RS11335	963.222	2.09319	0.34011	9.61958e-11	4.59654e-09	glu
LMD38_RS11355	57.067	1.82503	0.753934	0.00193117	0.0105547	glu
LMD38_RS11410	47.5476	-1.61892	1.00049	0.0103554	0.0419935	glu
LMD38_RS11515	170.942	1.35257	0.447392	0.000979151	0.00604877	glu
LMD38_RS11525	332.709	1.91403	0.513648	2.95415e-05	0.000312432	glu
LMD38_RS11530	720.969	2.26116	0.557641	3.60134e-06	4.84167e-05	glu
LMD38_RS11570	84.9846	1.59687	0.463819	0.000156999	0.00131086	glu
LMD38_RS11590	50.3133	-1.79776	0.977271	0.00490889	0.0227235	glu
LMD38_RS11785	99.9674	1.42266	0.440875	0.000447943	0.00312222	glu
LMD38_RS12110	197.258	-1.50853	0.59564	0.00311217	0.0156437	glu
LMD38_RS12115	915.275	-2.16883	0.546567	6.42772e-06	8.04175e-05	glu
LMD38_RS12315	255.671	-1.00376	0.281345	0.000225218	0.00177225	glu
LMD38_RS12350	163.732	-1.34637	0.602638	0.00881882	0.0366235	glu
LMD38_RS12355	777.362	-3.83457	0.477531	3.06326e-19	7.1464e-17	glu
LMD38_RS12360	334.899	2.60813	0.449715	2.50861e-10	1.04728e-08	glu
LMD38_RS12375	1641.77	2.53598	0.484039	6.89976e-09	1.92707e-07	glu
LMD38_RS12385	459.57	-1.54585	0.430454	9.95441e-05	0.000883204	glu
LMD38_RS12390	38.9267	-1.61592	1.12714	0.00936214	0.0385168	glu
LMD38_RS12405	513.235	1.11868	0.436844	0.00544497	0.0248501	glu
LMD38_RS12445	234.295	1.50397	0.48036	0.00053921	0.00363021	glu
LMD38_RS12450	251.734	1.60363	0.426997	4.80598e-05	0.000466027	glu
LMD38_RS12645	92.0011	1.63301	0.527265	0.000475114	0.00326004	glu
LMD38_RS12665	151.361	1.66288	0.539743	0.000472021	0.00325937	glu
LMD38_RS12705	246.036	1.06513	0.325965	0.000629825	0.00414013	glu
LMD38_RS12795	80.9741	1.43142	0.559289	0.00335979	0.016677	glu
LMD38_RS12805	42.3749	-2.05007	0.703424	0.000312535	0.0023387	glu
LMD38_RS12930	183.83	-1.40457	0.435189	0.000460027	0.00318963	glu
LMD38_RS13000	41.7847	-1.97633	0.802024	0.0011404	0.0068528	glu
LMD38_RS13015	64.3424	-1.30143	0.5969	0.0108281	0.0434657	glu
LMD38_RS13190	499.161	-1.16681	0.427988	0.00318314	0.01596	glu
LMD38_RS13315	103.508	1.81446	0.576446	0.00027816	0.00211338	glu
LMD38_RS13655	94.1533	-1.37971	0.449345	0.000806016	0.00512285	glu
LMD38_RS13675	82.8024	-1.75673	0.553096	0.000287139	0.00217327	glu
LMD38_RS13715	84.8179	1.40636	0.596268	0.00586981	0.0263942	glu
LMD38_RS13750	63.844	-1.25557	0.583821	0.0125562	0.049292	glu
LMD38_RS13785	667.65	-1.08013	0.404563	0.00419151	0.0201289	glu
LMD38_RS13820	217.053	1.35024	0.414783	0.000454428	0.00316186	glu
LMD38_RS13855	176.704	1.10861	0.409402	0.00362212	0.0177789	glu
LMD38_RS13885	456.645	2.26879	0.583142	6.78555e-06	8.46273e-05	glu
LMD38_RS14060	95.6921	-1.89343	0.718082	0.000979103	0.00604877	glu
LMD38_RS14145	31.5791	1.61609	0.80185	0.00731727	0.0316815	glu
LMD38_RS14225	121.9	2.16184	0.532647	4.52754e-06	5.94576e-05	glu
LMD38_RS14230	190.55	2.0941	0.485033	1.76004e-06	2.58531e-05	glu
LMD38_RS14245	44.7464	2.0659	0.909387	0.00120514	0.00714841	glu
LMD38_RS14260	188.732	-1.24341	0.453277	0.00272334	0.0140766	glu
LMD38_RS14335	217.128	-1.48407	0.458554	0.000392287	0.0027932	glu
LMD38_RS14340	209.452	-2.15244	0.495982	1.39777e-06	2.0919e-05	glu
LMD38_RS14345	56.3935	-1.48608	0.622214	0.0046696	0.0219427	glu
LMD38_RS14355	30.3257	-2.00978	1.00443	0.0020158	0.0109217	glu
LMD38_RS14360	148.652	-1.94565	0.44367	1.78525e-06	2.60306e-05	glu
LMD38_RS14365	134.994	-2.01526	0.595055	7.99082e-05	0.000733602	glu
LMD38_RS14380	59.7961	2.56582	0.790448	2.52743e-05	0.000274624	glu
LMD38_RS14440	1630.71	1.14114	0.505554	0.0116975	0.0463933	glu
LMD38_RS14445	96.3912	1.44092	0.635788	0.00681356	0.0296952	glu
LMD38_RS14465	165.24	1.38634	0.419609	0.000363726	0.00263237	glu
LMD38_RS14600	1390.51	1.61959	0.552863	0.000821508	0.00521296	glu
LMD38_RS14610	837.162	2.37984	0.410743	4.61474e-10	1.84869e-08	glu
LMD38_RS14665	412.289	2.10445	0.550986	1.34573e-05	0.000155602	glu
LMD38_RS14670	241.578	1.54514	0.406946	4.51033e-05	0.000444974	glu
LMD38_RS14750	384.799	1.27943	0.449587	0.00190146	0.0104593	glu
LMD38_RS14895	382.035	-1.0259	0.388533	0.0048653	0.0226685	glu
LMD38_RS14935	41.7683	-2.29344	0.883275	0.000315915	0.00235511	glu
LMD38_RS14985	1531.47	-2.95831	0.570474	2.43489e-09	7.72541e-08	glu
LMD38_RS14995	84.2037	2.18266	0.621508	3.4175e-05	0.000352968	glu
LMD38_RS15010	319.139	1.91986	0.386253	1.13277e-07	2.35212e-06	glu
LMD38_RS15025	100.129	1.61764	0.414074	2.56984e-05	0.000277711	glu
LMD38_RS15035	325.519	-2.00647	0.489023	5.3624e-06	6.88261e-05	glu
LMD38_RS15050	149.373	-2.5085	0.551142	2.19039e-07	4.27935e-06	glu
LMD38_RS15055	260.185	-1.68164	0.446168	3.96831e-05	0.000398438	glu
LMD38_RS15080	5670.11	1.91624	0.556517	8.2713e-05	0.000755321	glu
LMD38_RS15125	502.713	1.69675	0.519825	0.000242479	0.00188934	glu
LMD38_RS15250	231.385	-3.33505	0.673794	1.81292e-09	5.94218e-08	glu
LMD38_RS15255	537.864	-2.77214	0.47922	1.70387e-10	7.50841e-09	glu
LMD38_RS15300	341.17	2.24899	0.492273	3.95982e-07	6.94895e-06	glu
LMD38_RS15305	760.762	1.39395	0.361921	4.58878e-05	0.000448254	glu
LMD38_RS15315	70.8175	-1.63414	0.872357	0.00839695	0.0353374	glu
LMD38_RS15425	19927.7	2.10103	0.648818	0.000104781	0.000923472	glu
LMD38_RS15450	137.695	-1.15323	0.415195	0.00278292	0.0143152	glu
LMD38_RS15520	677.316	1.37376	0.468205	0.00125468	0.0073829	glu
LMD38_RS15660	102.052	-1.3959	0.644707	0.00934637	0.0384919	glu
LMD38_RS15690	151.557	-1.64097	0.581806	0.00108475	0.00656811	glu
LMD38_RS15695	1257.89	-1.26628	0.513957	0.00573039	0.0259142	glu
LMD38_RS15700	661.653	-1.55424	0.299819	7.02972e-08	1.55403e-06	glu
LMD38_RS15720	935.686	1.27046	0.472023	0.00304079	0.0153628	glu
LMD38_RS15730	265.63	1.75278	0.557403	0.000320655	0.00238596	glu
LMD38_RS15735	238.212	1.51133	0.46102	0.000324789	0.00240487	glu
LMD38_RS15740	423.751	1.01798	0.280867	0.000178805	0.00146517	glu
LMD38_RS15745	112.382	-1.02266	0.371935	0.00354336	0.0174571	glu
LMD38_RS15750	47.6327	-1.69895	0.653718	0.00174514	0.00980346	glu
LMD38_RS15780	158.255	-1.54161	0.741539	0.00800365	0.034095	glu
LMD38_RS15795	110.112	-1.27527	0.55176	0.00831906	0.0350971	glu
LMD38_RS15815	60.5183	-1.58095	0.649287	0.00341538	0.0168685	glu
LMD38_RS15855	392.314	1.01465	0.399572	0.00656443	0.0288631	glu
LMD38_RS15875	77.9908	-1.61281	0.611591	0.0019112	0.0104963	glu
LMD38_RS16105	135.64	-1.16616	0.445078	0.00432801	0.0207055	glu
LMD38_RS16145	1058.39	-1.34336	0.625187	0.0107447	0.0431747	glu
LMD38_RS16245	289.161	-2.79777	0.617078	9.71097e-08	2.04998e-06	glu
LMD38_RS16300	97.713	-1.54631	0.560449	0.00156195	0.00892609	glu
LMD38_RS16355	713.991	2.35998	0.384817	6.21862e-11	3.12191e-09	glu
LMD38_RS16365	213.931	1.43317	0.483895	0.00104492	0.00638545	glu
LMD38_RS16450	171.033	1.56141	0.373784	9.06173e-06	0.000108249	glu
LMD38_RS16485	1899.83	2.61205	0.703483	4.78417e-06	6.24145e-05	glu
LMD38_RS16505	318.548	-0.966253	0.283996	0.000431698	0.00302493	glu
LMD38_RS16620	187.583	-1.71129	0.500116	0.000136755	0.00116388	glu
LMD38_RS16630	608.901	1.98736	0.350428	2.18662e-09	7.0505e-08	glu
LMD38_RS16720	2220.84	1.89629	0.4863	1.55942e-05	0.00017772	glu
LMD38_RS16735	251.042	-2.05784	0.554384	2.26088e-05	0.000247697	glu
LMD38_RS16740	178.752	-1.09614	0.455862	0.00855808	0.0359035	glu
LMD38_RS16745	316.175	-1.02091	0.343025	0.00175693	0.00984179	glu
LMD38_RS16770	65.2877	2.26571	0.647212	2.83943e-05	0.00030272	glu
LMD38_RS16780	305.709	0.833746	0.325004	0.00732728	0.0316903	glu
LMD38_RS16785	97.6149	1.35428	0.482969	0.00192132	0.0105248	glu
LMD38_RS16790	491.985	3.05919	0.359397	2.04451e-19	5.4057e-17	glu
LMD38_RS16805	95.4852	1.49772	0.491037	0.000708048	0.00456605	glu
LMD38_RS16820	2032.97	1.12862	0.500867	0.0120225	0.0474915	glu
LMD38_RS16830	610.118	3.17524	0.452946	1.60301e-14	1.5137e-12	glu
LMD38_RS16905	445.792	-3.46917	0.556866	7.88789e-13	5.68789e-11	glu
LMD38_RS16910	262.549	-2.89699	0.510783	2.18042e-10	9.39949e-09	glu
LMD38_RS17125	340.695	0.681199	0.274909	0.0105666	0.042632	glu
LMD38_RS17160	580.59	-2.08778	0.682112	0.000186301	0.00151719	glu
LMD38_RS17165	5710.68	-2.20614	0.646573	4.50646e-05	0.000444974	glu
LMD38_RS17170	1155.14	-3.38977	0.521904	2.08401e-13	1.65303e-11	glu
LMD38_RS17175	1038.93	-2.19623	0.469244	2.64946e-07	5.00369e-06	glu
LMD38_RS17200	8508.73	-1.98133	0.68087	0.000380248	0.00271724	glu
LMD38_RS17260	69.0507	-1.18621	0.521411	0.0104762	0.0423911	glu
LMD38_RS17275	866.034	-2.51768	0.596065	8.91739e-07	1.43766e-05	glu
LMD38_RS17290	535.815	-1.64574	0.384319	4.96793e-06	6.43883e-05	glu
LMD38_RS17320	141.971	1.26382	0.523621	0.00655466	0.0288521	glu
LMD38_RS17390	126.035	1.96723	0.47779	5.49057e-06	7.02439e-05	glu
LMD38_RS17400	200.519	1.75499	0.527812	0.000175494	0.00144148	glu
LMD38_RS17410	99.7787	-1.54372	0.573604	0.00189881	0.0104593	glu
LMD38_RS17445	187.668	1.82676	0.433912	4.9055e-06	6.37875e-05	glu
LMD38_RS17500	130.187	-1.22998	0.465587	0.00372105	0.0181613	glu
LMD38_RS17530	78.5669	-1.56907	0.780596	0.00840222	0.0353374	glu
LMD38_RS17595	854.381	-2.11108	0.52963	6.86382e-06	8.53352e-05	glu
LMD38_RS17630	6102.54	-1.53427	0.624317	0.0035718	0.0175536	glu
LMD38_RS17705	353.831	1.10696	0.405274	0.00338651	0.0167852	glu
LMD38_RS17745	151.852	1.04682	0.406132	0.00568121	0.0257324	glu
LMD38_RS17775	921.463	1.5827	0.390419	1.48327e-05	0.000170019	glu
LMD38_RS17780	151.114	-1.93838	0.452068	2.7969e-06	3.89211e-05	glu
LMD38_RS17800	171.959	-2.26661	0.524497	1.15353e-06	1.75958e-05	glu
LMD38_RS17840	250.258	-1.00715	0.439234	0.0127626	0.0497843	glu
LMD38_RS17850	164.638	-2.86899	0.636152	8.4521e-08	1.81195e-06	glu
LMD38_RS17865	2080.02	1.50939	0.687699	0.00687703	0.0299389	glu
LMD38_RS17880	244.284	1.30697	0.29022	3.02178e-06	4.16125e-05	glu
LMD38_RS17895	1293.19	3.32402	0.448602	4.76191e-16	5.9018e-14	glu
LMD38_RS17900	88.1374	1.38539	0.470166	0.0011846	0.00705424	glu
LMD38_RS17940	128.917	-2.25972	0.657567	3.58538e-05	0.000366485	glu
LMD38_RS18040	91.0066	1.50282	0.718815	0.00860611	0.0360041	glu
LMD38_RS18075	86.5043	1.53299	0.658871	0.00488854	0.0227058	glu
LMD38_RS18135	501.768	1.06133	0.395578	0.00412682	0.0199112	glu
LMD38_RS18170	619.164	3.20706	0.621861	1.08365e-09	3.76997e-08	glu
LMD38_RS18175	536.41	1.99314	0.493213	7.14019e-06	8.84938e-05	glu
LMD38_RS18190	788.419	1.5886	0.488464	0.00030975	0.00232225	glu
LMD38_RS18240	71.087	-1.50896	0.523959	0.00117601	0.00702418	glu
LMD38_RS18245	127.088	-1.5837	0.538814	0.000855125	0.00536618	glu
LMD38_RS18305	659.926	1.11754	0.445332	0.00628276	0.0278718	glu
LMD38_RS18350	950.81	1.84135	0.330633	5.17356e-09	1.49556e-07	glu
LMD38_RS18445	1166.08	2.20195	0.812768	0.000334575	0.00246417	glu
LMD38_RS18455	1295.36	3.5186	0.570908	9.52648e-13	6.62843e-11	glu
LMD38_RS18470	20545.3	-2.67428	0.769606	8.67215e-06	0.000104893	glu
LMD38_RS18475	26935.1	-2.06434	0.760695	0.000503658	0.00342039	glu
LMD38_RS18480	431.665	2.11561	0.454956	3.66425e-07	6.57575e-06	glu
LMD38_RS18535	494.701	-1.63113	0.418514	2.60613e-05	0.000279667	glu
LMD38_RS18550	138968	2.31035	0.625132	1.26267e-05	0.000147721	glu
LMD38_RS18555	195.19	1.42934	0.572945	0.00399649	0.0193529	glu
LMD38_RS18565	94.3041	-1.83287	0.723874	0.00147536	0.00850479	glu
LMD38_RS18575	88.1759	-3.90992	1.3013	8.38675e-07	1.35763e-05	glu
LMD38_RS18625	599.166	1.20706	0.325183	0.000102867	0.00090862	glu
LMD38_RS18640	336.946	0.998485	0.380275	0.00523536	0.0240875	glu
LMD38_RS18645	132.649	1.4941	0.486705	0.000668889	0.00437037	glu
LMD38_RS18665	677.618	1.81481	0.323927	4.48382e-09	1.31725e-07	glu
LMD38_RS18670	429.164	1.70422	0.357441	4.64009e-07	8.03606e-06	glu
LMD38_RS18675	213.811	0.917185	0.370677	0.00872847	0.0364008	glu
LMD38_RS18685	184.058	2.29228	0.393953	4.87895e-10	1.90876e-08	glu
LMD38_RS18695	143.797	3.19205	0.39876	8.3297e-18	1.43633e-15	glu
LMD38_RS18760	617.234	1.11043	0.359534	0.00110001	0.00665039	glu
LMD38_RS18765	412.094	1.68471	0.301103	5.85376e-09	1.67022e-07	glu
LMD38_RS18785	110.353	2.07556	0.487574	2.38985e-06	3.37301e-05	glu
LMD38_RS18795	124.9	1.27972	0.449511	0.0018941	0.0104479	glu
LMD38_RS18860	2994.58	1.84639	0.495644	3.41754e-05	0.000352968	glu
LMD38_RS18875	263.982	1.13878	0.439863	0.00490251	0.0227235	glu
LMD38_RS18880	283.168	1.18781	0.366177	0.000591396	0.00391565	glu
LMD38_RS18905	312.403	1.44804	0.418448	0.000189249	0.00153804	glu
LMD38_RS18910	303.279	1.70482	0.322922	3.29532e-08	7.87304e-07	glu
LMD38_RS18915	143.139	1.95779	0.43251	9.13283e-07	1.46643e-05	glu
LMD38_RS18920	73.252	1.09931	0.483608	0.0119251	0.0472006	glu
LMD38_RS18930	487.056	1.17125	0.321936	0.000143096	0.00121265	glu
LMD38_RS18965	471.452	1.05895	0.289787	0.000152734	0.00127794	glu
LMD38_RS19035	104.469	2.77236	0.686481	8.36571e-07	1.35763e-05	glu
LMD38_RS19050	8703.86	3.00478	0.67918	7.50393e-08	1.6352e-06	glu
LMD38_RS19065	104.653	-1.61245	0.605097	0.00177598	0.00990651	glu
LMD38_RS19080	386.165	0.827583	0.331058	0.0088579	0.0367473	glu
LMD38_RS19090	546.274	1.71324	0.27608	1.40098e-10	6.31395e-09	glu
LMD38_RS19100	140.313	2.46121	0.460401	4.74647e-09	1.38416e-07	glu
LMD38_RS19110	10856.4	1.77815	0.623755	0.00073866	0.00475573	glu
LMD38_RS19130	286.025	-1.33503	0.533304	0.00461628	0.0217695	glu
LMD38_RS19140	202.831	-1.81059	0.434388	6.06253e-06	7.63302e-05	glu
LMD38_RS19145	93.6464	-3.59447	0.85036	1.84841e-08	4.69922e-07	glu
LMD38_RS19150	166.347	1.36672	0.313966	5.57144e-06	7.10493e-05	glu
LMD38_RS19160	96.5436	1.47547	0.696123	0.00866647	0.0361802	glu
LMD38_RS19165	2752.62	2.35638	0.581541	2.84047e-06	3.93892e-05	glu
LMD38_RS19170	2085.51	1.67704	0.604331	0.00114389	0.00686129	glu
LMD38_RS19185	830.854	-1.05263	0.392613	0.00419225	0.0201289	glu
LMD38_RS19190	1000.67	1.78476	0.496918	6.39959e-05	0.000607196	glu
LMD38_RS19200	118.035	-1.20584	0.464581	0.00438826	0.0209685	glu
LMD38_RS19205	154.554	2.29511	0.539572	1.44086e-06	2.14829e-05	glu
LMD38_RS19210	176.07	3.06062	0.881679	2.22359e-06	3.14956e-05	glu
LMD38_RS19215	187.791	1.94591	0.433375	1.10734e-06	1.70222e-05	glu
LMD38_RS19220	101.495	1.39126	0.521831	0.00269297	0.0139612	glu
LMD38_RS19225	1160.51	2.39789	0.37665	1.29525e-11	7.23516e-10	glu
LMD38_RS19230	472.029	2.6151	0.404731	4.09131e-12	2.45851e-10	glu
LMD38_RS19235	446.113	2.19503	0.346269	2.413e-11	1.29324e-09	glu
LMD38_RS19265	188.851	-1.21874	0.421789	0.00181309	0.010071	glu
LMD38_RS19270	672.111	1.22027	0.444404	0.00279239	0.0143454	glu
LMD38_RS19345	404.008	-1.48361	0.406622	8.87434e-05	0.000799901	glu
LMD38_RS19350	178.046	-1.78911	0.436459	8.47695e-06	0.000103445	glu
LMD38_RS19360	195.752	-1.1595	0.524674	0.0127662	0.0497843	glu
LMD38_RS19375	186.252	-2.9454	0.629762	3.03351e-08	7.29145e-07	glu
LMD38_RS19395	222.795	1.29683	0.371422	0.000211359	0.00169002	glu
LMD38_RS19410	142.468	-1.72616	0.522835	0.00020151	0.00162768	glu
LMD38_RS19420	373.514	1.6335	0.509819	0.000334894	0.00246417	glu
LMD38_RS19485	618.293	2.43614	0.298413	2.14892e-17	3.40904e-15	glu
LMD38_RS19490	491.639	1.41093	0.511663	0.00200598	0.0108833	glu
LMD38_RS19495	81.9794	1.73439	0.914389	0.00588578	0.026436	glu
LMD38_RS19500	1755.11	1.56463	0.427941	7.54255e-05	0.000700556	glu
LMD38_RS19515	261.58	-1.87576	0.518276	4.79252e-05	0.000465861	glu
LMD38_RS19570	151.191	1.33338	0.410249	0.000474167	0.00325953	glu
LMD38_RS19580	75.677	1.62259	0.516332	0.000418623	0.00294895	glu
LMD38_RS19585	211.493	2.10757	0.422483	7.05309e-08	1.55403e-06	glu
LMD38_RS19595	857.726	1.90607	0.39489	2.39503e-07	4.56708e-06	glu
LMD38_RS19615	103.395	1.91326	0.461075	5.35783e-06	6.88261e-05	glu
LMD38_RS19670	1057.29	1.00131	0.338727	0.00191348	0.0104963	glu
LMD38_RS19735	90.1625	-2.04372	0.642257	0.000144936	0.00122562	glu
LMD38_RS19765	421.939	-1.2848	0.383139	0.000354307	0.0025736	glu
LMD38_RS19770	547.625	-1.13484	0.442352	0.0052621	0.0241825	glu
LMD38_RS19780	162.733	-1.32811	0.459973	0.00155656	0.0089081	glu
LMD38_RS19785	631.387	-1.53906	0.529406	0.00102517	0.00629384	glu
LMD38_RS19805	139.074	-2.56911	0.586469	3.9299e-07	6.9271e-06	glu
LMD38_RS19810	903.151	2.76219	0.3841	1.78915e-14	1.65018e-12	glu
LMD38_RS19825	1718.88	1.62752	0.524647	0.000472551	0.00325937	glu
LMD38_RS19830	2961.06	1.73146	0.461496	3.86784e-05	0.000390327	glu
LMD38_RS19835	1024.13	1.43072	0.347905	1.46882e-05	0.00016885	glu
LMD38_RS19845	445.743	2.28296	0.413671	2.80623e-09	8.62754e-08	glu
LMD38_RS19850	133.124	1.78735	0.474455	3.27243e-05	0.000341538	glu
LMD38_RS19855	236.88	1.66542	0.386855	4.33941e-06	5.75588e-05	glu
LMD38_RS19930	677.784	-2.97501	0.41066	6.28275e-15	6.5572e-13	glu
LMD38_RS19940	217.808	-1.86209	0.436688	3.61627e-06	4.84531e-05	glu
LMD38_RS19975	166.258	-2.16717	0.520198	2.85888e-06	3.95064e-05	glu
LMD38_RS20150	283.803	1.07467	0.304154	0.000238073	0.00186232	glu
LMD38_RS20170	53.7664	-1.49532	0.754805	0.0106917	0.0430489	glu
LMD38_RS20195	109.518	-1.61401	0.641001	0.0025915	0.013488	glu
LMD38_RS20210	85.8194	-1.5903	0.689731	0.00450076	0.0213262	glu
LMD38_RS20220	162.813	-1.34845	0.572842	0.00660374	0.0289717	glu
LMD38_RS20225	286.438	-1.5809	0.403414	2.60394e-05	0.000279667	glu
LMD38_RS20240	86.4544	-1.56136	0.515989	0.000681899	0.00443346	glu
LMD38_RS20255	668.628	1.79707	0.64365	0.000832951	0.00527713	glu
LMD38_RS20380	483.055	1.53369	0.389519	2.6091e-05	0.000279667	glu
LMD38_RS20385	383.606	1.30804	0.392139	0.000365139	0.00263778	glu
LMD38_RS20390	369.41	1.21343	0.46997	0.00450855	0.0213376	glu
LMD38_RS20420	2597.12	1.49997	0.521835	0.00121531	0.00717252	glu
LMD38_RS20455	1383.69	-2.78346	0.502456	6.61249e-10	2.45095e-08	glu
LMD38_RS20490	497.408	-0.870574	0.354147	0.00954998	0.0392489	glu
LMD38_RS20520	86.3692	-1.4859	0.696934	0.00825311	0.0349651	glu
LMD38_RS20565	113.11	-2.85524	0.541531	2.21803e-09	7.09413e-08	glu
LMD38_RS20570	371.096	1.3482	0.455597	0.00120762	0.00714841	glu
LMD38_RS20595	898.9	3.66038	0.399162	3.8372e-23	1.90229e-20	glu
LMD38_RS20660	1759.28	-1.91306	0.483283	1.18715e-05	0.00013971	glu
LMD38_RS20665	169.548	-1.22262	0.475063	0.00455267	0.021513	glu
LMD38_RS20685	509.037	-1.03181	0.34824	0.00181148	0.010071	glu
LMD38_RS20775	34.6479	-1.74598	0.850572	0.00470718	0.0220688	glu
LMD38_RS20780	95.3634	-2.803	0.618795	9.71748e-08	2.04998e-06	glu
LMD38_RS20845	145.619	-1.00972	0.439412	0.0125654	0.049292	glu
LMD38_RS20850	176.819	2.57491	0.618425	9.64092e-07	1.52944e-05	glu
LMD38_RS20930	180.678	-1.37523	0.440713	0.000689252	0.00446662	glu
LMD38_RS20945	65.6466	-2.10075	0.593719	3.83885e-05	0.00038839	glu
LMD38_RS20960	1115.88	-1.67758	0.298626	5.2039e-09	1.49556e-07	glu
LMD38_RS20995	190.747	-1.44647	0.585864	0.00413431	0.019923	glu
LMD38_RS21005	461.227	2.76902	0.422333	1.42767e-12	9.59688e-11	glu
LMD38_RS21010	97.2023	1.79338	0.755662	0.00232718	0.0122571	glu
LMD38_RS21020	1091.03	-4.72058	0.607294	1.93807e-19	5.4057e-17	glu
LMD38_RS21095	324.082	-1.07168	0.449587	0.00932839	0.0384583	glu
LMD38_RS21100	478.277	1.68073	0.357354	6.62369e-07	1.10842e-05	glu
LMD38_RS21105	747.724	2.26339	0.338501	2.09505e-12	1.36213e-10	glu
LMD38_RS21115	160.561	1.45239	0.500038	0.00120637	0.00714841	glu
LMD38_RS21125	202.211	1.28623	0.477951	0.00297236	0.0150747	glu
LMD38_RS21215	142.719	-1.54534	0.465015	0.000262267	0.0020158	glu
LMD38_RS21235	682.572	-1.69335	0.344003	2.18474e-07	4.27935e-06	glu
LMD38_RS21275	17974.4	-1.67333	0.665893	0.00229455	0.0121174	glu
LMD38_RS21280	2954.34	-3.58824	0.594596	1.52684e-12	1.00924e-10	glu
LMD38_RS21285	143.087	-1.26403	0.523513	0.00653762	0.0288091	glu
LMD38_RS21300	90.5187	-1.53216	0.798984	0.0107322	0.0431681	glu
LMD38_RS21320	1901.18	-4.48925	0.598384	1.99517e-18	3.59674e-16	glu
LMD38_RS21325	578.714	-4.97624	0.472967	1.66521e-30	2.20141e-27	glu
LMD38_RS21335	642.988	1.14896	0.394204	0.00183818	0.0101677	glu
LMD38_RS21390	343.518	1.96257	0.478156	5.85454e-06	7.41824e-05	glu
LMD38_RS21480	660.821	1.04384	0.449382	0.0113086	0.0450752	glu
LMD38_RS21560	297.897	1.05892	0.334721	0.000907345	0.00565807	glu
LMD38_RS21640	149.488	-1.60232	0.5471	0.000851582	0.00535241	glu
LMD38_RS21650	585.976	-1.5566	0.369746	7.92352e-06	9.72288e-05	glu
LMD38_RS21665	2673.23	3.1395	0.604094	1.15809e-09	3.9939e-08	glu
LMD38_RS21670	5721.48	3.79882	0.473895	4.11704e-19	8.59377e-17	glu
LMD38_RS21690	179.023	-1.32522	0.435758	0.000963375	0.00596992	glu
LMD38_RS21715	302.233	1.6447	0.534332	0.000493609	0.00336945	glu
LMD38_RS21720	288.868	2.2866	0.366602	3.80126e-11	1.9579e-09	glu
LMD38_RS21725	400.666	2.29285	0.435467	1.10117e-08	2.91149e-07	glu
LMD38_RS21730	280.336	0.900125	0.315786	0.00295353	0.0149983	glu
LMD38_RS21735	353.43	0.751629	0.297774	0.00881457	0.0366235	glu
LMD38_RS21740	1290.94	2.58039	0.406822	9.64605e-12	5.54438e-10	glu
LMD38_RS21785	31.7695	-1.87264	0.806283	0.00205206	0.0110878	glu
LMD38_RS21810	76.1268	-1.64805	0.680852	0.0030329	0.0153424	glu
LMD38_RS21850	135.086	-3.51452	0.613731	1.32401e-11	7.29307e-10	glu
LMD38_RS21855	469.578	-3.26422	0.420108	3.97377e-17	6.06152e-15	glu
LMD38_RS21860	315.742	-3.85892	0.594298	2.40903e-14	2.12315e-12	glu
LMD38_RS21970	137.149	1.64453	0.688646	0.00329529	0.0164391	glu
LMD38_RS21975	859.949	2.07159	0.371256	3.12525e-09	9.41222e-08	glu
LMD38_RS21980	1006.76	1.64212	0.428595	3.3318e-05	0.000346822	glu
LMD38_RS21985	1474.33	1.88692	0.40559	5.81284e-07	9.85202e-06	glu
LMD38_RS21990	2403.22	1.0887	0.478968	0.0121006	0.0476574	glu
LMD38_RS21995	144.981	-1.46517	0.537509	0.00199751	0.0108522	glu
LMD38_RS22090	167.41	2.01825	0.479164	3.28931e-06	4.48295e-05	glu
LMD38_RS22135	126.149	-1.65836	0.452041	6.10065e-05	0.000583016	glu
LMD38_RS22140	323.278	1.24987	0.409573	0.00103797	0.00635278	glu
LMD38_RS22190	102.833	-2.00854	0.722988	0.000502996	0.00342039	glu
LMD38_RS22210	366.016	2.02134	0.327624	1.00749e-10	4.7568e-09	glu
LMD38_RS22225	517.539	2.18433	0.468811	3.0089e-07	5.52468e-06	glu
LMD38_RS22230	277.347	2.99706	0.326232	6.21506e-22	2.46489e-19	glu
LMD38_RS22235	1362.06	3.27716	0.347304	2.10274e-23	1.19135e-20	glu
LMD38_RS22240	1179.74	2.85935	0.325738	3.84539e-20	1.38644e-17	glu
LMD38_RS22260	140.434	1.56031	0.570174	0.00161988	0.00923054	glu
LMD38_RS22315	696.246	1.42439	0.44925	0.000540047	0.00363021	glu
LMD38_RS22455	35.6326	-1.4996	0.802679	0.0126097	0.049417	glu
LMD38_RS22475	277.391	-1.7416	0.349579	1.48401e-07	3.00285e-06	glu
LMD38_RS22590	196.756	-1.94837	0.541203	4.39421e-05	0.000437876	glu
LMD38_RS22595	217.298	-1.57674	0.361306	3.86468e-06	5.1434e-05	glu
LMD38_RS22660	229.527	-1.04314	0.370337	0.00282614	0.0145	glu
LMD38_RS22670	1328.81	-1.27114	0.493088	0.00418259	0.0201289	glu
LMD38_RS22685	24112.9	4.07583	0.674943	1.98772e-13	1.60883e-11	glu
LMD38_RS22715	1489.54	-1.51041	0.463893	0.000351083	0.00255955	glu
LMD38_RS22745	178.009	-1.31463	0.49395	0.00309482	0.015596	glu
LMD38_RS22750	425.378	-0.970437	0.308433	0.00105579	0.00642521	glu
LMD38_RS22765	150.066	-1.66061	0.569808	0.000791581	0.00504728	glu
LMD38_RS22770	168.938	-1.92991	0.460804	4.39017e-06	5.8038e-05	glu
LMD38_RS22780	194.526	-1.51229	0.364179	1.09095e-05	0.000128772	glu
LMD38_RS22785	1289.92	-1.63099	0.423347	3.12194e-05	0.000327556	glu
LMD38_RS22815	72.4436	-1.40736	0.640761	0.0085301	0.0358373	glu
LMD38_RS22850	175.306	-1.70599	0.551704	0.00041747	0.00294606	glu
LMD38_RS22880	392.327	1.9522	0.337257	1.17809e-09	4.02785e-08	glu
LMD38_RS22900	75.9091	-1.66888	0.763013	0.00470757	0.0220688	glu
LMD38_RS22910	5012.05	1.81444	0.480495	2.99487e-05	0.000315896	glu
LMD38_RS22925	228.217	-1.4316	0.388427	8.35023e-05	0.000757827	glu
LMD38_RS22950	619.378	1.84904	0.29842	1.17665e-10	5.4901e-09	glu
LMD38_RS22960	35.8683	-1.72403	0.768543	0.00364647	0.0178542	glu
LMD38_RS22980	109.002	-1.25801	0.424578	0.00136384	0.00790804	glu
LMD38_RS23000	109.138	-1.3806	0.41354	0.000325015	0.00240487	glu
LMD38_RS23005	444.066	-3.56173	0.739704	1.38888e-09	4.66806e-08	glu
LMD38_RS23015	404.674	1.4623	0.504624	0.00121056	0.00715514	glu
LMD38_RS23030	571.955	-1.27834	0.364133	0.000201978	0.00162814	glu
LMD38_RS23055	193.142	-2.48739	0.514057	6.00047e-08	1.35988e-06	glu
LMD38_RS23075	929.732	-3.67777	0.566424	5.51703e-14	4.75664e-12	glu
LMD38_RS23090	352.815	1.0741	0.27154	4.48264e-05	0.000444454	glu
LMD38_RS23105	3704.92	-2.10945	0.571744	2.17356e-05	0.000240121	glu
LMD38_RS23110	4917.31	-2.16398	0.652573	6.91564e-05	0.000651482	glu
LMD38_RS23155	1005.82	1.42338	0.422918	0.000276503	0.00210561	glu
LMD38_RS23180	666.837	2.0527	0.389111	1.75784e-08	4.49781e-07	glu
LMD38_RS23240	175.617	2.10153	0.458761	5.23675e-07	9.02998e-06	glu
LMD38_RS23265	932.251	-1.38262	0.39123	0.000159678	0.00132486	glu
LMD38_RS23270	6081.17	-1.50607	0.613373	0.00380504	0.0185163	glu
LMD38_RS23275	509.198	-1.15478	0.390686	0.00160259	0.00914512	glu
LMD38_RS23280	4728.39	-1.49482	0.533655	0.00152392	0.00874655	glu
LMD38_RS23335	326.67	1.77805	0.307766	1.72903e-09	5.71443e-08	glu
LMD38_RS23370	727.167	1.51261	0.390656	3.52268e-05	0.000361942	glu
LMD38_RS23465	77.9009	-2.73521	0.582994	5.82132e-08	1.32978e-06	glu
LMD38_RS23475	131.266	1.31273	0.592892	0.00982165	0.0402403	glu
LMD38_RS23505	625.469	-1.0417	0.406862	0.00599873	0.0268218	glu
LMD38_RS23525	44.9413	-1.61946	0.745786	0.00552241	0.0251456	glu
LMD38_RS23540	107.073	-1.06835	0.471841	0.012707	0.0496513	glu
LMD38_RS23585	87.5182	-1.99882	0.561371	4.52344e-05	0.00044516	glu
LMD38_RS23600	285764	2.10977	0.708556	0.000222469	0.0017541	glu
LMD38_RS23605	241204	1.92622	0.684122	0.000568024	0.00378314	glu
LMD38_RS23645	840.676	-1.59669	0.322864	2.28215e-07	4.41513e-06	glu
LMD38_RS23655	43.5205	-1.90038	0.73182	0.00105791	0.00642521	glu
LMD38_RS23690	194.937	-1.39507	0.585009	0.00562428	0.0255508	glu
LMD38_RS23720	6265.9	2.24784	0.447673	4.37798e-08	1.0274e-06	glu
LMD38_RS23775	33.9126	-1.91172	0.857586	0.00214027	0.0114862	glu
LMD38_RS23795	182.561	1.28759	0.344646	8.43724e-05	0.000763975	glu
LMD38_RS23800	1646.65	1.29042	0.507315	0.00445693	0.0212199	glu
LMD38_RS23805	231.137	1.10327	0.397483	0.00298131	0.0151007	glu
LMD38_RS23815	2281.77	1.95487	0.332828	7.06359e-10	2.57011e-08	glu
LMD38_RS23830	760.991	2.3629	0.356613	2.53576e-12	1.59632e-10	glu
LMD38_RS23835	2060.34	2.45501	0.428806	5.75105e-10	2.1666e-08	glu
LMD38_RS23840	1306.5	2.29182	0.34696	3.40534e-12	2.07778e-10	glu
LMD38_RS23865	53.3168	-1.50771	0.717353	0.00832738	0.0350971	glu
LMD38_RS23870	340.481	-1.68693	0.339776	1.78049e-07	3.58448e-06	glu
LMD38_RS23875	227.823	-1.2617	0.31057	2.29497e-05	0.00025074	glu
LMD38_RS23915	87.037	2.67868	0.59863	1.86197e-07	3.71084e-06	glu
LMD38_RS23920	276.589	1.26503	0.367877	0.000267796	0.00205431	glu
LMD38_RS23940	266.348	1.06514	0.356947	0.00163105	0.00928084	glu
LMD38_RS23955	77.1369	1.29364	0.454507	0.00185925	0.0102699	glu
LMD38_RS23985	1962.65	2.49296	0.305913	2.12708e-17	3.40904e-15	glu
LMD38_RS23990	129.612	-1.3578	0.565986	0.0058075	0.0261436	glu
LMD38_RS23995	255.008	-1.82961	0.484052	2.86471e-05	0.000304021	glu
LMD38_RS24010	242.412	-2.63997	0.340283	3.45333e-16	4.5653e-14	glu
LMD38_RS24025	105.875	-1.4691	0.579731	0.00334736	0.0166361	glu
LMD38_RS24065	142.725	0.991366	0.37641	0.00515554	0.0237754	glu
LMD38_RS24150	105.382	-2.33577	0.524439	5.39982e-07	9.2309e-06	glu
LMD38_RS24155	47.5252	-1.56348	0.610546	0.00258852	0.013488	glu
LMD38_RS24190	335.34	-1.7367	0.354718	2.31712e-07	4.46103e-06	glu
LMD38_RS24195	162.982	-1.25525	0.569818	0.011144	0.0445984	glu
LMD38_RS24200	160.267	-1.36007	0.512045	0.00291854	0.0148587	glu
LMD38_RS24205	136.502	-1.53743	0.50022	0.000612408	0.00404128	glu
LMD38_RS24345	256.763	1.78648	0.414352	3.39027e-06	4.57435e-05	glu
LMD38_RS24360	6549.68	-1.34107	0.586309	0.00786245	0.0336018	glu
LMD38_RS24375	1806.11	0.882537	0.346802	0.00742568	0.0320111	glu
LMD38_RS24425	277.643	-1.52202	0.391502	3.2566e-05	0.000340783	glu
LMD38_RS24430	647.957	-1.57986	0.262761	5.7907e-10	2.1666e-08	glu
LMD38_RS24590	240.347	1.22514	0.525304	0.00856398	0.0359035	glu
LMD38_RS24615	261.751	-1.42614	0.408579	0.000175551	0.00144148	glu
LMD38_RS24620	147.01	-1.60514	0.647025	0.00289686	0.0147718	glu
LMD38_RS24635	35789.2	1.89411	0.598922	0.000221761	0.00175277	glu
LMD38_RS24645	163.439	-1.45891	0.434767	0.00027071	0.00207266	glu
LMD38_RS24670	114.306	1.30892	0.552234	0.00679439	0.0296442	glu
LMD38_RS24680	236.404	1.7152	0.336999	8.89599e-08	1.89686e-06	glu
LMD38_RS24810	64.4109	-1.94493	0.882314	0.00199714	0.0108522	glu
LMD38_RS24825	1425.12	1.06912	0.468163	0.0120926	0.0476574	glu
LMD38_RS24840	323.83	-2.22339	0.339546	5.78205e-12	3.42263e-10	glu
LMD38_RS24845	230.372	-1.52323	0.336517	1.99098e-06	2.86095e-05	glu
LMD38_RS24850	432.452	-2.94018	0.462661	3.07593e-12	1.90612e-10	glu
LMD38_RS24880	457.17	0.665362	0.245301	0.00542517	0.0247883	glu
LMD38_RS24920	368.981	-1.18144	0.429363	0.00289619	0.0147718	glu
LMD38_RS24945	314.975	-1.15715	0.437107	0.00405478	0.0196113	glu
LMD38_RS24990	83.8801	2.06059	0.632926	0.000110037	0.000952852	glu
LMD38_RS25050	1136.64	2.15247	0.358751	2.21844e-10	9.46055e-09	glu
LMD38_RS25060	516.529	-4.12684	0.478607	4.93216e-22	2.17344e-19	glu
LMD38_RS25065	844.562	-1.20677	0.494448	0.00667007	0.0291981	glu
LMD38_RS25120	2187.3	2.30614	0.325833	1.24441e-13	1.05007e-11	glu
LMD38_RS25155	94.5271	-1.44795	0.501741	0.00128676	0.00753807	glu
LMD38_RS25175	360.139	-0.700587	0.284947	0.0109928	0.0440378	glu
LMD38_RS25275	482.434	3.43653	0.487312	3.81749e-15	4.2056e-13	glu
LMD38_RS25280	374.966	1.36136	0.494283	0.00219973	0.0117063	glu
LMD38_RS25285	84.7722	-1.75567	0.567145	0.000372411	0.00268055	glu
LMD38_RS25310	1002.86	-1.5051	0.516658	0.0010712	0.00649596	glu
LMD38_RS25320	1450.13	1.13604	0.338866	0.000430285	0.00302037	glu
LMD38_RS25330	360.829	-2.46308	0.429753	5.43858e-10	2.07398e-08	glu
LMD38_RS25410	225.996	-2.24856	0.466777	1.21243e-07	2.49145e-06	glu
LMD38_RS25445	435.415	1.5243	0.43847	0.00015772	0.00131251	glu
LMD38_RS25450	181.499	1.13144	0.490873	0.0105358	0.0425509	glu
LMD38_RS25455	588.337	1.36415	0.347739	3.58244e-05	0.000366485	glu
LMD38_RS25460	816.919	1.80785	0.363922	1.41831e-07	2.88463e-06	glu
LMD38_RS25470	16083.7	2.01143	0.555213	3.50506e-05	0.000361066	glu
LMD38_RS25475	1715.83	1.44307	0.482696	0.000941787	0.00585443	glu
LMD38_RS25480	2283.42	1.60509	0.625183	0.00233113	0.0122616	glu
LMD38_RS25490	614.775	4.18834	0.588658	8.16031e-17	1.11599e-14	glu
LMD38_RS25495	8297.95	2.51224	0.559487	2.85755e-07	5.29582e-06	glu
LMD38_RS25500	3248.99	4.26214	0.381348	1.78393e-33	3.53753e-30	glu
LMD38_RS25505	13926.6	2.38618	0.477581	3.56714e-08	8.47142e-07	glu
LMD38_RS25510	3573.24	1.39654	0.54145	0.00339005	0.0167852	glu
LMD38_RS25515	4740.66	1.8101	0.531571	0.000118791	0.00102196	glu
LMD38_RS25520	12875.4	1.2628	0.581617	0.0118342	0.0468877	glu
LMD38_RS25525	4366.44	1.72316	0.569562	0.000496479	0.00338322	glu
LMD38_RS25530	7392.99	1.34691	0.571492	0.00657518	0.0288784	glu
LMD38_RS25535	2913.99	1.35482	0.565842	0.00590684	0.0264707	glu
LMD38_RS25545	4379.69	1.51392	0.525641	0.00116471	0.00696715	glu
LMD38_RS25550	2557.76	1.57971	0.585927	0.00174435	0.00980346	glu
LMD38_RS25555	2471.36	1.57396	0.55795	0.00123878	0.00730016	glu
LMD38_RS25560	2038.48	1.73138	0.569195	0.000463874	0.00321069	glu
LMD38_RS25570	5297.68	1.42993	0.588956	0.00473173	0.0221304	glu
LMD38_RS25625	2911.73	1.31395	0.49419	0.00312165	0.0156714	glu
LMD38_RS25650	351.265	1.12194	0.392406	0.00225963	0.0119489	glu
LMD38_RS25665	3468.48	1.35429	0.567704	0.00604354	0.0269918	glu
LMD38_RS25670	2804.33	1.84934	0.50064	3.82677e-05	0.000388158	glu
LMD38_RS25730	790.412	1.2492	0.3353	9.24271e-05	0.000828551	glu
LMD38_RS25735	942.338	0.979382	0.301787	0.00074508	0.00478928	glu
LMD38_RS25805	334.52	-2.02569	0.615789	0.000107611	0.000937985	glu
LMD38_RS25845	2112.15	1.02084	0.442052	0.0120418	0.04752	glu
LMD38_RS25855	53.4898	2.06448	0.735002	0.000397377	0.00281932	glu
LMD38_RS25865	202.537	1.31358	0.34955	7.47053e-05	0.000695496	glu
LMD38_RS25870	372.971	1.10762	0.327115	0.0003944	0.00280321	glu
LMD38_RS25875	444.147	1.70872	0.33138	6.32982e-08	1.42637e-06	glu
LMD38_RS25880	383.715	1.09144	0.378983	0.00219871	0.0117063	glu
LMD38_RS25885	774.116	0.791622	0.256258	0.00149983	0.00862079	glu
LMD38_RS25890	3979.62	2.06929	0.563336	2.54193e-05	0.000275445	glu
LMD38_RS25905	8148.43	1.50219	0.441819	0.000215455	0.00171585	glu
LMD38_RS25910	1474.1	1.88935	0.530551	5.76273e-05	0.000553798	glu
LMD38_RS25915	2828.34	1.30314	0.455837	0.00176438	0.00986042	glu
LMD38_RS25940	190.135	1.15754	0.51739	0.011989	0.0474062	glu
LMD38_RS25950	275.125	1.97752	0.521122	1.9794e-05	0.000221135	glu
[truncated: 2,623 more rows]
